# Supplementary material for: Systematic photophysical, thermal and electrochemical analysis of a series of phenothiazine cored conjugated aromatic unit appended D–π–A based high-solid state luminescent materials: their applications in reversible mechanofluorochromic and volatile acid sensing
Source: Royal Society of Chemistry journal article supplement (doi:10.1039/d1ma01162f), 2022-01-01
Supplement: d1ma01162f1.pdf [file d1ma01162f1.pdf]

# 1 Supporting Information

## 2 **photophysical, thermal and electrochemical analysis of a series of** 3 **phenothiazine cored conjugated aromatic unit appended D- $\pi$ -A based** 4 **high-solid state luminescence materials: their applications in reversible** 5 **mechano-fluorochromism and volatile acid sensing**

6  
7 *Bhaswati Sarkar,<sup>†</sup> Edamana Prasad,<sup>\*,†</sup> Ramesh. L. Gardas<sup>\*,†</sup>*

8 <sup>†</sup>Department of Chemistry, Indian Institute of Technology Madras, Chennai, 600036, India

9 \*Corresponding authors' email: [pre@iitm.ac.in](mailto:pre@iitm.ac.in) (EP) [gardas@iitm.ac.in](mailto:gardas@iitm.ac.in) (RLG)

---

10

11

12

13

14

15

16

17

18

19

20

21

22

23 **TABLE OF CONTENTS**24 **No table of figures entries found.**

| Sl. No. | Description                                                                               | Page No. |
|---------|-------------------------------------------------------------------------------------------|----------|
| 1       | Experimental Details                                                                      | S3-S7    |
| 2       | $^1\text{H}$ and $^{13}\text{C}$ NMR                                                      | S8-S25   |
| 3       | DFT Study                                                                                 | S26-S27  |
| 4       | Table for properties obtained from DFT                                                    | S27      |
| 5       | Determination of quantum yield and life plot                                              | S27-S28  |
| 6       | Time-resolved fluorescence decay parameters of PT derivatives                             | S29      |
| 7       | Absorption spectra in different solvents                                                  | S30      |
| 8       | Photographs of the solutions in different solvents                                        | S31      |
| 9       | Absorption spectra for AIE study                                                          | S32      |
| 10      | Emission Intensity vs. $f_w$ (%)                                                          | S33      |
| 11      | Emission wavelength ( $\lambda_{\text{Peak}}$ ) vs. $f_w$ (%) plot                        | S34      |
| 12      | TGA plots                                                                                 | S35      |
| 13      | Extraction of HOMO                                                                        | S35      |
| 14      | CV plots                                                                                  | S36-S42  |
| 15      | Tables for HOMO-LUMO calculations                                                         | S43      |
| 16      | HOMO-LUMO energy calculations                                                             | S44      |
| 17      | Fluorescence spectra of PT-derivatives upon grinding–fuming cycles                        | S44      |
| 18      | Absorption spectra of PT-C2-(Ph) $_2$ upon grinding–fuming cycles                         | S44      |
| 19      | Time-resolved fluorescence decay parameters of solid PT-C2-(Ph) $_2$ in its pristine      | S45      |
| 20      | Fluorescence emission spectra of PT-C2-(Pn) $_2$ thin film under TFA and TEA              | S45      |
| 21      | $^1\text{H}$ NMR spectra of PT-C2-(Pn) $_2$ in $\text{CDCl}_3$ in presence of TFA and TEA | S45      |
| 22      | TD-DFT calculation                                                                        | S46-S49  |
| 23      | $\Delta E_{\text{ST}}$ calculations                                                       | S50      |

25

26

27

## 28 Experimental details

### 29 Materials

30 All reagents were used as purchased from commercial sources. All reactions were carried out in oven-dried  
31 glassware under an atmosphere of nitrogen (N<sub>2</sub>) gas and were magnetically stirred. Dichloromethane was distilled  
32 over CaH<sub>2</sub>. Toluene was distilled over sodium. The reactions were monitored by thin-layer chromatography (TLC)  
33 analysis using Merck silica gel (60 F254) pre-coated plates (0.25 mm), and compounds were visualized under a UV  
34 chamber or using phosphomolybdic acid (PMA) solution. Column chromatography was performed on silica gel (100–  
35 200 mesh or 60–120 mesh).

### 36 Instrumentation

37 <sup>1</sup>H (400 MHz) and <sup>13</sup>C (100 MHz) NMR spectra were obtained using a Bruker Avance 400 MHz FT-NMR spectrometer  
38 in deuterated chloroform (CDCl<sub>3</sub>) with TMS as an internal reference unless otherwise stated. All chemical shifts are  
39 reported in parts per million (ppm,  $\delta$ ): <sup>1</sup>H NMR spectra are referenced to the residual proton solvent peak (CDCl<sub>3</sub>,  $\delta$   
40 = 7.26 ppm); <sup>13</sup>C NMR spectra are referenced to the residual proton solvent peak (CDCl<sub>3</sub>,  $\delta$  = 77.16 ppm). The  
41 following abbreviations are used for the proton spectra multiplicities: s, singlet; d, doublet; t, triplet; q, quartet; qt,  
42 quintet; m, multiplet. Coupling constants (*J*) are reported in hertz (Hz). High-resolution mass spectra (HRMS) were  
43 recorded on a Q-Tofmicro micromass spectrometer. The infrared spectra of compounds were recorded on a JASCO  
44 FT/IR-4100 Fourier transform infrared spectrometer. Spectroscopic grade solvents (i.e., dichloromethane)  
45 purchased commercially were used for recording UV–vis absorption spectra (Shimadzu UV-3100 UV–vis–NIR  
46 absorption spectrophotometer). Fluorescence spectra were recorded using JASCO FP-6300 spectrofluorometer.  
47 Powder XRD (P-XRD) patterns have been performed on Bruker D8 Advance X-ray diffractometer using Cu K $\alpha$   
48 radiation ( $\lambda$  = 1.54178 Å). Thermogravimetric analyses (TGA) and Differential Scanning Calorimetry (DSC) studies  
49 were performed on SDT Q600 V20.9 Build 20 (Module- DSC TGA Standard and InstSerial 0600-1572) under nitrogen  
50 gas atmosphere at a heating rate of 10 °C/min. The voltammetric measurements were conducted using the  
51 electrochemical workstation (CH Instruments 660A) with the conventional three-electrode system. All DFT and TD-  
52 DFT calculations were performed using the Gaussian 09 program package.

### 53 Synthetic procedure and characterization of the fluorophore

#### 54 Synthesis of 10-ethyl-10H-phenothiazine (8a) and 10-dodecyl-10H-phenothiazine (8b):

55 Alkylation reaction of phenothiazine was done according to the previous report.<sup>1</sup> A portion of 30 mL of 50% NaOH  
56 aqueous solution (30 mL) was added into a dried, two-neck, round-bottom flask furnished with a magnetic stir bar  
57 containing 10H-phenothiazine (10.0 g, 50.2 mmol) dissolved in toluene (30 mL). Afterward, tetrabutylammonium  
58 bromide (TBAB) (367 mg, 1.14 mmol) was added to the mixture. Then, 1-bromoalkane (4.46 mL, 60.2 mmol and  
59 14.46 mL, 60.2 mmol for ethylbromide and dodecylbromide, respectively) was added very slowly in a dropwise  
60 manner into the final mixture and allowed to stir under reflux condition overnight. The reaction growth was checked  
61 by thin-layer chromatography (TLC). Immediately after the starting material was consumed fully (as verified by TLC),  
62 the reaction mixture was allowed to cool to room temperature. Then the organic compounds were extracted by  
63 ethyl acetate (30  $\times$  7 mL). The combined organic layer was washed with brine, dried over anhydrous Na<sub>2</sub>SO<sub>4</sub>, filtered,  
64 and concentrated at the rotary evaporator. The crude product was then purified using hexane as the eluent to  
65 obtain the desired compound by silica gel column chromatography.

#### 67 10-ethyl-10H-phenothiazine (8a):

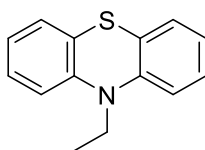

68

69 Time: 12 h. Yield: 11.07g, 97%. flexy greenish white solid. <sup>1</sup>H NMR (400 MHz, CDCl<sub>3</sub>):  $\delta$  7.14 (t, *J* = 8.0 Hz, 2H) (PT-  
70 H), 7.12 (d, *J* = 7.6 Hz, 2H) (PT-H), 6.90 (t, *J* = 7.6 Hz, 2H) (PT-H), 6.86 (d, *J* = 8.4 Hz, 2H) (PT-H), 3.93 (q, *J* = 6.8 Hz, 2H)

71 (-CH<sub>2</sub>-), 1.42 (t, *J* = 6.8 Hz, 3H) (-CH<sub>3</sub>). <sup>13</sup>C NMR (100 MHz, CDCl<sub>3</sub>): δ 145.1, 127.5, 127.3, 124.6, 122.4, 115.2, 41.9,  
72 13.2.

73

74 **10-dodecyl-10H-phenothiazine (8b):**

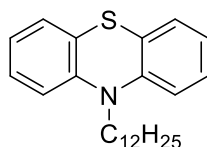

75

76 Time: 12 h. Yield: 17.52 g, 95%. waxy type yellowish-green liquid. <sup>1</sup>H NMR (400 MHz, CDCl<sub>3</sub>): δ 7.14 (t, *J* = 8.0 Hz,  
77 2H) (PT-H), 7.13 (d, *J* = 7.6 Hz, 2H) (PT-H), 6.90 (t, *J* = 7.2 Hz, 2H) (PT-H), 6.86 (d, *J* = 8.0 Hz, 2H) (PT-H), 3.84 (q, *J* =  
78 7.2 Hz, 2H) (-CH<sub>2</sub>-), 1.80 (qt, *J* = 7.2 Hz, 2H) (-CH<sub>2</sub>-), 1.42 (qt, *J* = 7.2 Hz, 2H) (-CH<sub>2</sub>-), 1.34-1.22 (m, 16H) (8 × -CH<sub>2</sub>-),  
79 0.89 (t, *J* = 6.8 Hz, 3H) (-CH<sub>3</sub>). <sup>13</sup>C NMR (100 MHz, CDCl<sub>3</sub>): δ 145.5, 127.5, 127.3, 125.0, 122.4, 115.5, 47.5, 32.1, 29.8  
80 (× 2), 29.7 (× 2), 29.5, 29.4, 27.1, 27.0, 22.9, 14.3.

81

82 **Synthesis of 10-ethyl-10H-phenothiazine-3-carbaldehyde (7a) and 10-dodecyl-10H-phenothiazine-3-carbaldehyde (7b):**

83 The compound was synthesized according to previous literature with slight modifications.<sup>2</sup> In a two-neck, round-  
84 bottom flask, a freshly distilled dimethylformamide (DMF) solution was kept under an N<sub>2</sub> atmosphere and allowed  
85 to cool under an ice bath for 15 min. Then POCl<sub>3</sub> was added very slowly in a dropwise manner keeping under the  
86 ice for 30 min. Then the ice bath was removed and heated the Vilsmeier-Haack reagent at 45 °C for another 30 min.  
87 Afterward, the heating oil bath was removed, was allowed to cool to room temperature, and again kept under an  
88 ice bath. Then, after 10 min, the DCM solution of the N-alkyl-phenothiazine (4 g) was slowly added. Now, after 10  
89 mins, the ice bath was removed and warmed to room temperature. Finally, the resulting mixture was heated at 80  
90 °C for 3-4 hrs. The reaction progress was checked by thin-layer chromatography (TLC). After that, the reaction  
91 mixture was cooled to room temperature. Then, the reaction was quenched with 50-60 ml water, neutralized with  
92 a few drops of saturated Na<sub>2</sub>CO<sub>3</sub> solution to remove POCl<sub>3</sub> altogether. Now, the reaction mixture was neutralized  
93 by 2N HCl, and the organic components were extracted by ethyl acetate (EtOAc). The combined organic layer was  
94 washed with ice-cold water and brine solution, then dried over anhydrous Na<sub>2</sub>SO<sub>4</sub>, filtered, and concentrated at the  
95 rotary evaporator. The crude product was then purified by silica gel column chromatography using hexane-ethyl  
96 acetate mixtures (5% ethyl acetate in hexanes) as the eluent to obtain the desired compound.

97

98 **10-ethyl-10H-phenothiazine-3-carbaldehyde (7a):**

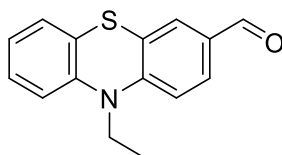

99

100 Time: 3 h. Yield: 2.92 g, 65%. Highly viscous yellowish-green liquid. <sup>1</sup>H NMR (400 MHz, CDCl<sub>3</sub>): δ 9.79 (s, 1H) (-  
101 CH=O), 7.63 (dd, *J*<sub>1</sub> = 8.8 Hz and *J*<sub>2</sub> = 1.6 Hz, 1H) (PT-H), 7.57 (s, 1H) (PT-H), 7.16 (t, *J* = 8.0 Hz, 1H) (PT-H), 7.10 (d,  
102 *J* = 7.6 Hz, 1H) (PT-H), 6.96 (t, *J* = 7.6 Hz, 1H) (PT-H), 6.91 (d, *J* = 5.2 Hz, 1H) (PT-H), 6.89 (d, *J* = 5.2 Hz, 1H) (PT-H),  
103 3.98 (q, *J* = 7.2 Hz, 1H) (-CH<sub>2</sub>-), 1.45 (t, *J* = 7.2 Hz, 3H) (-CH<sub>3</sub>). <sup>13</sup>C NMR (100 MHz, CDCl<sub>3</sub>): δ 190.1, 150.4, 143.2, 131.1,  
104 130.3, 128.3, 127.7, 127.6, 124.6, 123.7, 123.4, 115.7, 114.5, 42.6, 13.0.

105

106 **10-dodecyl-10H-phenothiazine-3-carbaldehyde (7b):**

107

108

109

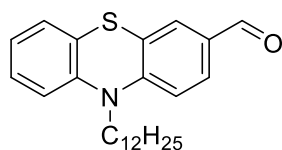

110 Time: 3 h. Yield: 2.58 g, 60%. Highly viscous yellowish-green liquid. <sup>1</sup>H NMR (400 MHz, CDCl<sub>3</sub>): δ 9.79 (s, 1H) (-CH=O),  
111 7.64 (dd, *J*<sub>1</sub> = 8.8 Hz and *J*<sub>2</sub> = 1.6 Hz, 1H) (PT-H), 7.58 (s, 1H) (PT-H), 7.16 (t, *J* = 7.6 Hz, 1H) (PT-H), 7.11 (d, *J* = 7.6 Hz,  
112 1H) (PT-H), 6.96 (t, *J* = 7.6 Hz, 1H) (PT-H), 6.89 (t, *J* = 8.0 Hz, 1H) (PT-H), 6.89 (d, *J* = 7.6 Hz, 1H) (PT-H), 3.89 (q, *J* = 7.2  
113 Hz, 2H) (-CH<sub>2</sub>-), 1.81 (t, *J* = 7.2 Hz, 2H) (-CH<sub>2</sub>-), 1.43 (qt, *J* = 7.2 Hz, 2H) (-CH<sub>2</sub>-), 1.31-1.24 (m, 16H) (-CH<sub>2</sub>-), 0.86 (t, *J*

114 = 7.2 Hz, 3H) (-CH<sub>3</sub>). <sup>13</sup>C NMR (100 MHz, CDCl<sub>3</sub>): δ 190.1, 150.8, 143.5, 131.1, 130.2, 128.4, 127.6, 125.1, 123.9,  
115 123.6, 116.0, 114.9, 48.1, 32.01, 29.7, 29.6, 29.4, 29.3, 26.9, 26.8, 22.8, 14.2.  
116

### 117 **Synthesis of 3-(2,2-dibromovinyl)-10-ethyl-10H-phenothiazine (6a) and 3-(2,2-dibromovinyl)-10-dodecyl-10H-** 118 **phenothiazine (6b)**

119 In a two-neck, round-bottom flask, CBr<sub>4</sub> (10% 13C, 2.2 equiv.) was taken and dissolved in CH<sub>2</sub>Cl<sub>2</sub> (30 mL). To this,  
120 PPh<sub>3</sub> (4 equiv.) was added and purged with nitrogen three minutes.<sup>3</sup> Then, the resulting solution was stirred for 10  
121 minutes under ambient temperature. **7a/7b** (1 equiv.) in CH<sub>2</sub>Cl<sub>2</sub> (3 mL) was added at 0 °C and slowly, the reaction  
122 mixture was warmed to room temperature, stirred for 1 h. The solvent was removed under reduced pressure, and  
123 the residue was purified by flash column chromatography to give the **6a/6b** (96%) as a highly viscous yellowish-  
124 green liquid which was used for the next step.

125

### 126 **3-(2,2-dibromovinyl)-10-ethyl-10H-phenothiazine (6a):**

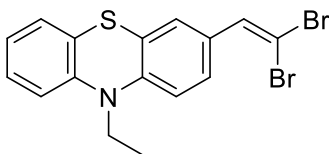

127

128 Time: 10 mins. Yield: 13.92 g, 96%. Highly viscous yellowish-green transparent liquid. <sup>1</sup>H NMR (400 MHz, CDCl<sub>3</sub>): δ  
129 7.36-7.29 (m, 2H) (PT-H), 7.31 (s, 1H) (-CHBr<sub>2</sub>), 7.14 (t, J = 7.2 Hz, 1H) (PT-H), 7.10 (d, J = 7.6 Hz, 1H) (PT-H), 6.91 (t,  
130 J = 7.2 Hz, 1H) (PT-H), 6.85 (d, J = 8.4 Hz, 1H) (PT-H), 6.81 (d, J = 8.8 Hz, 1H) (PT-H), 3.92 (q, J = 7.2 Hz, 2H) (-CH<sub>2</sub>-),  
131 1.42 (t, J = 7.2 Hz, 3H) (-CH<sub>3</sub>). <sup>13</sup>C NMR (100 MHz, CDCl<sub>3</sub>): δ 145.2, 144.3, 139.9, 135.7, 129.5, 127.9, 127.5, 127.1,  
132 124.2, 123.7, 122.8, 115.2, 114.6, 87.9, 42.0, 13.0.  
133

### 134 **3-(2,2-dibromovinyl)-10-dodecyl-10H-phenothiazine (6b):**

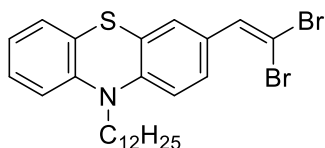

135

136

137

138 Time: 10 mins. Yield: 2.77 g, 96%. Highly viscous yellowish-green transparent liquid. <sup>1</sup>H NMR (400 MHz, CDCl<sub>3</sub>): δ  
139 7.36-7.29 (m, 2H) (PT-H), 7.31 (s, 1H) (-CHBr<sub>2</sub>), 7.14 (t, J = 8.0 Hz, 1H) (PT-H), 7.11 (d, J = 8.0 Hz, 1H) (PT-H), 6.91 (t,  
140 J = 8.0 Hz, 1H) (PT-H), 6.84 (d, J = 8.0 Hz, 1H) (PT-H), 6.80 (d, J = 8.0 Hz, 1H) (PT-H), 3.82 (q, J = 8.0 Hz, 2H) (-CH<sub>2</sub>-),  
141 1.81 (qt, J = 7.2 Hz, 2H) (-CH<sub>2</sub>-), 1.42 (qt, J = 8.0 Hz, 2H) (-CH<sub>2</sub>-), 1.38-1.24 (m, 16H) (-CH<sub>2</sub>-), 0.88 (t, J = 7.2 Hz, 3H) (-  
142 CH<sub>3</sub>). <sup>13</sup>C NMR (100 MHz, CDCl<sub>3</sub>): δ 145.5, 144.6, 135.7, 129.4, 127.8, 127.6, 127.4, 127.1, 124.7, 124.2, 122.8, 115.5,  
143 114.9, 87.8, 47.6, 32.0, 29.8, 29.7, 29.5, 29.3, 27.0, 27.0, 26.9, 22.8, 14.3.  
144

### 145 **Synthesis of 3-(2,2-di(aryl-2-yl)vinyl)-10-alkyl-10H-phenothiazine [PT-Cn-(Ar)<sub>2</sub>, where n=2 and 12 and Ar = phenyl,** 146 **Naphthyl, anthracenyl, phenanthryl, and Pyrenyl] (1-5):**

147 The following compounds were synthesized using the Suzuki-Miyaura cross-coupling mechanism.<sup>4</sup> In a one-necked  
148 round-bottom flask, compound **6** (1equiv.) was added in an oven-dried under N<sub>2</sub> atmosphere; then, a mixture of  
149 freshly distilled toluene/methanol (3:1) (24mL) was added into the flux under continuous N<sub>2</sub> purging. Then,  
150 potassium carbonate (5 equiv.) and Aryl-boronic acid (Ar-B(OH)<sub>2</sub>) (2.5 equiv.) and Pd(PPh<sub>3</sub>)<sub>4</sub> (0.08 equiv.) were  
151 added into the solution. The resulting mixture was purged with nitrogen gas for 20 min. Then the reaction mixture  
152 was allowed reflux at 80 °C under vigorous stirring overnight under the nitrogen gas atmosphere. The progress of  
153 the reaction was supervised through thin layer chromatography (TLC). As soon as the reaction was completed, the  
154 mixture was quenched with water and extracted with ethyl acetate (20 mL × 3). The combined organic layers were  
155 dried over anhydrous Na<sub>2</sub>SO<sub>4</sub>, filtered, and the filtrate was concentrated under a high vacuum. The crude product  
156 thus obtained was purified by silica-gel column chromatography using hexane-ethyl acetate mixtures (0-5% ethyl  
157 acetate in hexanes) as the eluant.  
158

159 **3-(2,2-diphenylvinyl)-10-ethyl-10H-phenothiazine [PT-C2-(Ph)<sub>2</sub>] (1a):**

160

161

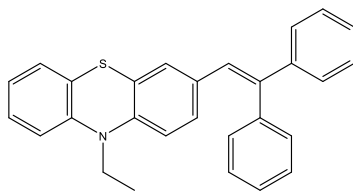

162 Time: 36h. Yield: 91%, 681.3 mg. Green solid. <sup>1</sup>H NMR (400 MHz, CDCl<sub>3</sub>): δ 7.36 (s, 2H) (Ph-H), 7.85 (d, *J* = 1.6 Hz, 1H) (Ph-H), 7.30-7.29 (m, 5H) (Ph-H), 7.22-7.20 (m, 2H) (Ph-H), 7.10 (t, *J* = 8.0 Hz, 1H) (PT-H), 7.05 (t, *J* = 8.0 Hz, 1H) (PT-H), 6.86 (t, *J* = 8.0 Hz, 1H) (PT-H), 6.82 (s, 1H) (PT-CH(Ph)<sub>2</sub>), 6.80 (d, *J* = 8.0 Hz, 1H) (PT-H), 6.76 (s, 1H) (PT-H), 6.76-6.73 (m, 1H) (PT-H), 6.58 (d, *J* = 8.0 Hz, 1H) (PT-H), 3.84 (q, *J* = 6.8 Hz, 2H) (-CH<sub>2</sub>-), 1.36 (t, *J* = 6.8 Hz, 3H) (-CH<sub>3</sub>). <sup>13</sup>C NMR (100 MHz, CDCl<sub>3</sub>): δ 140.6, 130.4, 128.9, 128.7, 128.3, 127.56, 127.52, 127.4, 127.3, 115.0, 114.4. HRMS (ESI-TOF) *m/z*: 406.1624 [M + H]<sup>+</sup> calcd. For C<sub>28</sub>H<sub>24</sub>NS, found 406.1600.

168

169 **3-(2,2-diphenylvinyl)-10-dodecyl-10H-phenothiazine [PT-C2-(Ph)<sub>2</sub>] (1b):**

170

171

172

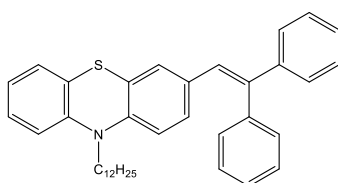

173 Time: 36h. Yield: 91%, 681.3 mg. Sticky green solid. <sup>1</sup>H NMR (400 MHz, CDCl<sub>3</sub>): δ 7.60 (s, *J* = 8 Hz, 1H) (Ph-H), 7.50-7.48 (m, 1H) (Ph-H), 7.48 (s, 1H) (Ph-H), 7.44 (t, *J* = 4 Hz, 1H) (Ph-H), 7.33-7.26 (m, 9H) (Ph-H), 7.16-7.10 (m, 3H) (PT-7.26-92 (t, *J* = 8 Hz, 1H) (PT-H), 6.85 (d, *J* = 8 Hz, 1H) (PT-H), 6.79 (d, *J* = 8 Hz, 1H) (PT-H), 3.83 (q, *J* = 7.2 Hz, 2H) (-CH<sub>2</sub>-), 1.79 (qt, *J* = 7.2 Hz, 2H) (-CH<sub>2</sub>-), 1.42 (qt, *J* = 7.2 Hz, 2H) (-CH<sub>2</sub>-), 1.30-1.24 (m, 16H) (-CH<sub>2</sub>-), 0.88 (t, *J* = 7.2 Hz, 3H) (-CH<sub>3</sub>). <sup>13</sup>C NMR (100 MHz, CDCl<sub>3</sub>): δ 130.4, 128.9, 128.6, 128.3, 127.5, 115.3, 114.7, 32.0, 29.8, 29.7, 29.5, 29.4, 27.0, 22.8, 14.3. HRMS (ESI-TOF) *m/z*: 568.3008 [M + Na]<sup>+</sup> calcd. For C<sub>38</sub>H<sub>43</sub>NSNa, found 568.2979.

178

179

180 **3-(2,2-di(naphthalen-2-yl)vinyl)-10-ethyl-10H-phenothiazine [PT-C2-(Nap)<sub>2</sub>] (2a):**

182

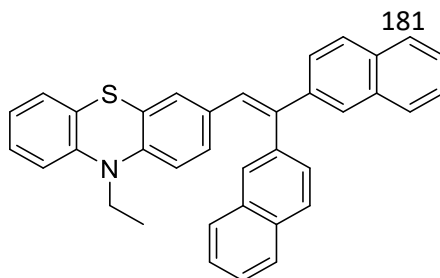

183 Time: 36h. Yield: 722 mg, 90 %. Bright yellow solid powder. <sup>1</sup>H NMR (400 MHz, CDCl<sub>3</sub>): δ 7.90 (d, *J* = 8.0 Hz, 1H) (Nap-H), 7.85 (d, *J* = 8.4 Hz, 1H) (Nap-H), 7.83-7.70 (m, 4H) (Nap-H), 7.75 (s, 1H) (Nap-H), 7.68 (s, 1H) (Nap-H), 7.55-7.47 (m, 2H) (Nap-H), 7.50 (d, *J* = 8.8 Hz, 1H) (Nap-H), 7.47-7.41 (m, 2H) (Nap-H), 7.39 (d, *J* = 8.4 Hz, 1H) (Nap-H), 7.10 (t, *J* = 8.0 Hz, 1H) (PT-H), 7.04 (d, *J* = 6.0 Hz, 1H) (PT-H), 7.03 (s, 1H) (PT-CH(Nap)<sub>2</sub>), 6.93 (s, 1H) (PT-H), 6.86 (t, *J* = 7.2 Hz, 1H) (PT-H), 6.79 (d, *J* = 8.0 Hz, 1H) (PT-H), 6.73 (d, *J* = 8.4 Hz, 1H) (PT-H), 6.50 (d, *J* = 8.8 Hz, 1H) (PT-H), 3.81 (q, *J* = 7.2 Hz, 2H) (-CH<sub>2</sub>-), 1.33 (t, *J* = 6.8 Hz, 3H) (-CH<sub>3</sub>). <sup>13</sup>C NMR (100 MHz, CDCl<sub>3</sub>): δ 144.5, 143.6, 141.1, 141.0, 138.2, 133.9, 133.5, 132.9, 132.87, 131.8, 129.5, 128.9, 128.8, 128.5, 128.4, 128.34, 128.32, 128.0, 127.9, 127.8, 127.6, 127.4, 127.3, 126.9, 126.3, 126.2, 126.1, 126.0, 125.8, 123.9, 123.5, 122.4, 115.0, 114.5, 41.8, 13.0. HRMS (ESI-TOF) *m/z*: 505.1864 [M]<sup>+</sup> calcd. For C<sub>36</sub>H<sub>27</sub>NS, found 505.1842.

192

193 **3-(2,2-dinaphthalenylvinyl)-10-dodecyl-10H-phenothiazine [PT-C12-(Nap)<sub>2</sub>] (2b):**



219 Time: 36h. Yield: 681 mg, 91%. Light yellow solid. <sup>1</sup>H NMR (400 MHz, CDCl<sub>3</sub>): δ 8.80-8.71 (m, 3H) (Pn-H), 8.67 (s, 1H)  
 220 (Pn-H), 8.65 (s, 1H) (Pn-H), 8.24 (d, *J* = 8.0 Hz, 1H) (Pn-H), 7.79 (s, 1H) (Pn-H), 7.78 (d, *J* = 6.4 Hz, 1H) (Pn-H), 7.70-  
 221 7.64 (m, 4H) (Pn-H), 7.63-7.54 (m, 4H) (Pn-H), 7.50 (t, *J* = 7.6 Hz, 1H) (Pn-H), 7.43 (t, *J* = 6.8 Hz, 1H) (Pn-H), 7.10 (s,  
 222 1H) (PT-CH(Pn<sub>2</sub>)), 7.07 (t, *J* = 7.2 Hz, 1H) (PT-H), 7.01 (d, *J* = 7.2 Hz, 1H) (PT-H), 6.91 (s, 1H) (PT-H), 6.84 (t, *J* = 7.6 Hz,  
 223 1H) (PT-H), 6.74 (d, *J* = 8.4 Hz, 1H) (PT-H), 6.70 (d, *J* = 8.8 Hz, 1H) (PT-H), 6.35 (d, *J* = 8.4 Hz, 1H) (PT-H), 3.71 (q, *J* =  
 224 6.8 Hz, 2H) (-CH<sub>2</sub>-), 1.25 (t, *J* = 6.8 Hz, 3H) (-CH<sub>3</sub>). <sup>13</sup>C NMR (100 MHz, CDCl<sub>3</sub>): δ 144.5, 143.8, 140.6, 137.8, 136.7,  
 225 134.0, 132.0, 131.5, 131.4, 131.1, 130.5, 130.4, 130.0, 129.0, 128.9, 128.7, 127.8, 127.4, 127.3, 127.2, 126.9, 126.8,  
 226 126.77, 126.7, 126.5, 123.5, 123.3, 123.1, 122.7, 122.5, 122.4, 115.0, 114.6, 41.8, 12.9. HRMS (ESI-TOF) *m/z*:  
 227 605.2177 [M]<sup>+</sup> calcd. For C<sub>44</sub>H<sub>31</sub>NS, found 605.2150.

228 **3-(2,2-diphenanthrenvinyl)-10-ethyl-10H-pyrene [PT-C2-(Pr)<sub>2</sub>] (5):**

229

230

231

232

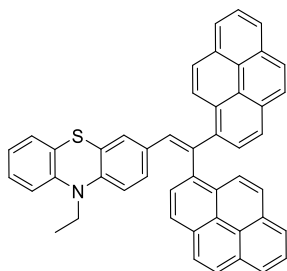

233

234

235 Time: 36h. Yield: 371.2 mg, 68%. Orange solid. <sup>1</sup>H NMR (500 MHz, CDCl<sub>3</sub>): δ 8.94 (d, *J* = 9.5 Hz, 1H) (Pr-H), 8.31 (d, *J*  
 236 = 9.5 Hz, 1H) (Pr-H), 8.20-8.16 (m, 4H) (Pr-H), 8.13-8.08 (m, 4H) (Pr-H), 8.06-7.96 (m, 5H) (Pr-H), 7.93 (d, *J* = 8.0 Hz,  
 237 1H) (Pr-H), 7.88 (d, *J* = 9.5 Hz, 1H) (Pr-H), 7.71 (d, *J* = 8.0 Hz, 1H) (Pr-H), 7.20 (s, 1H) (PT-CH(Pr<sub>2</sub>)), 7.06 (t, 1H) (PT-H),  
 238 7.01-6.96 (m, 1H) (PT-H), 6.90 (d, *J* = 2.0 Hz, 1H) (PT-H), 6.85-6.81 (m, 1H) (PT-H), 6.73 (d, *J* = 8.0 Hz, 1H) (PT-H),  
 239 6.59-6.55 (m, 1H) (PT-H), 6.33 (d, *J* = 8.5 Hz, 1H) (PT-H), 3.71 (q, *J* = 7.0 Hz, 2H) (-CH<sub>2</sub>-), 1.23 (t, *J* = 7.0 Hz, 3H) (-CH<sub>3</sub>).  
 240 HRMS (ESI-TOF) *m/z*: 654.2250 [M]<sup>+</sup> calcd. For C<sub>48</sub>H<sub>31</sub>NS, found 654.2176.  
 241

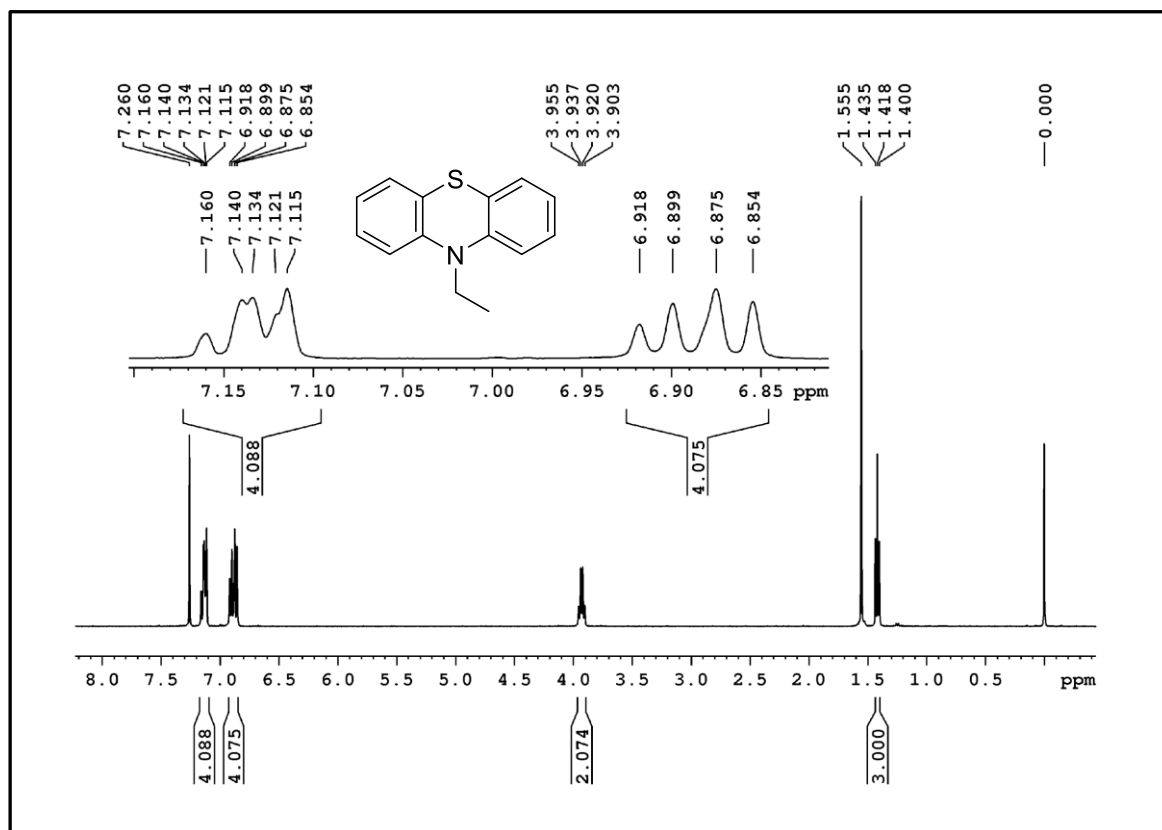

242

243 **Figure S1.** 400 MHz <sup>1</sup>H NMR spectrum of **8a** in CDCl<sub>3</sub>.



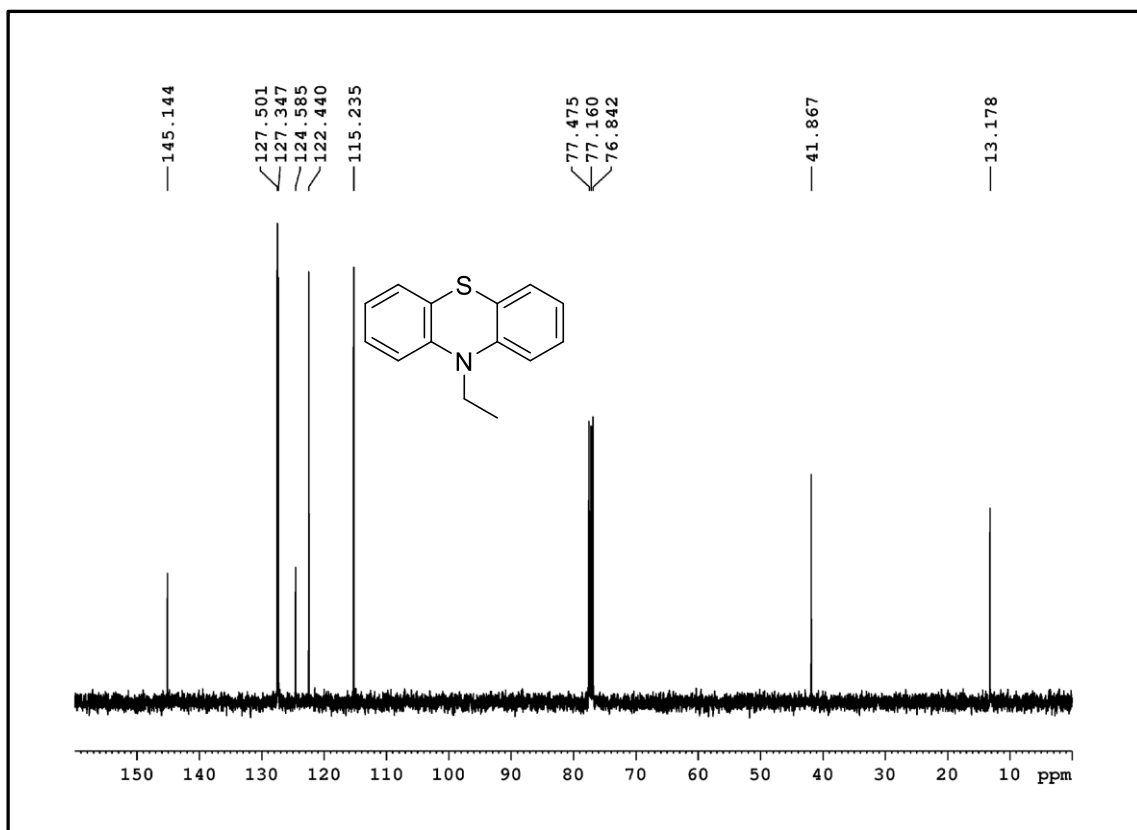

244

245 Figure S2. 100 MHz  $^{13}\text{C}$  NMR spectrum of **8a** in  $\text{CDCl}_3$ .

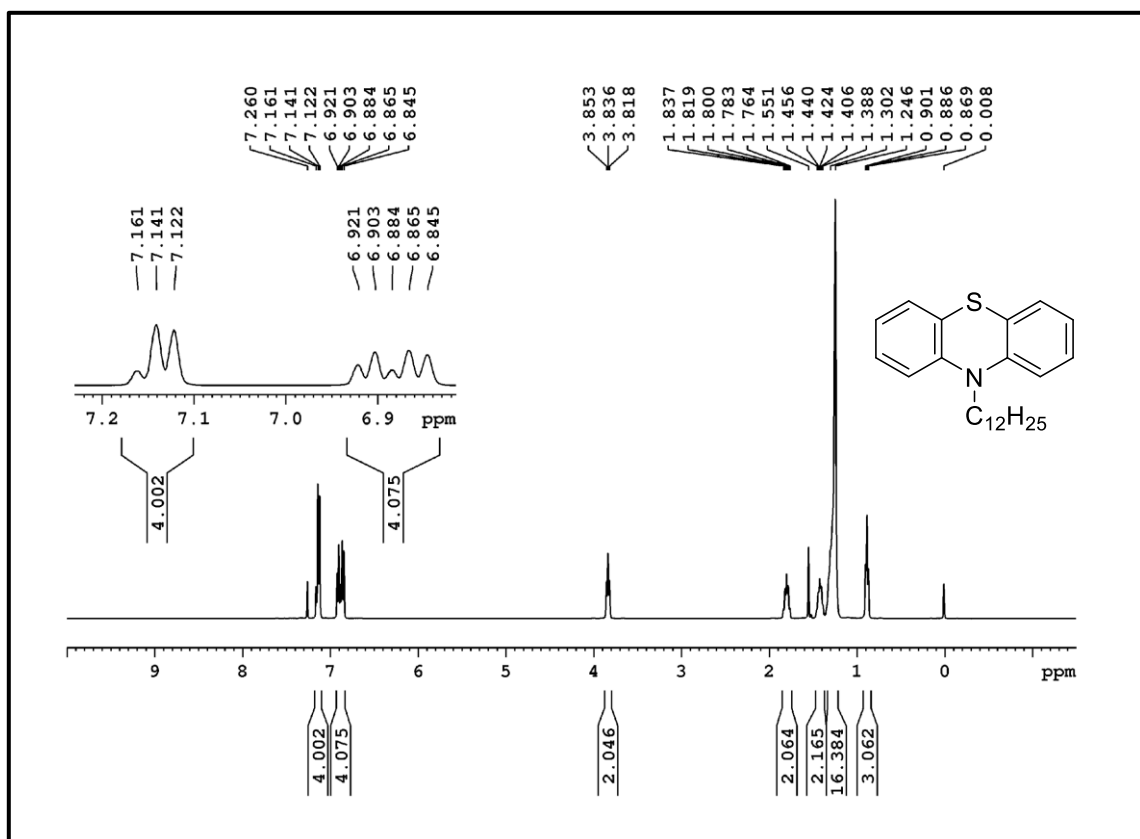

246

247 Figure S3. 400 MHz  $^1\text{H}$  NMR spectrum of **8b** in  $\text{CDCl}_3$ .

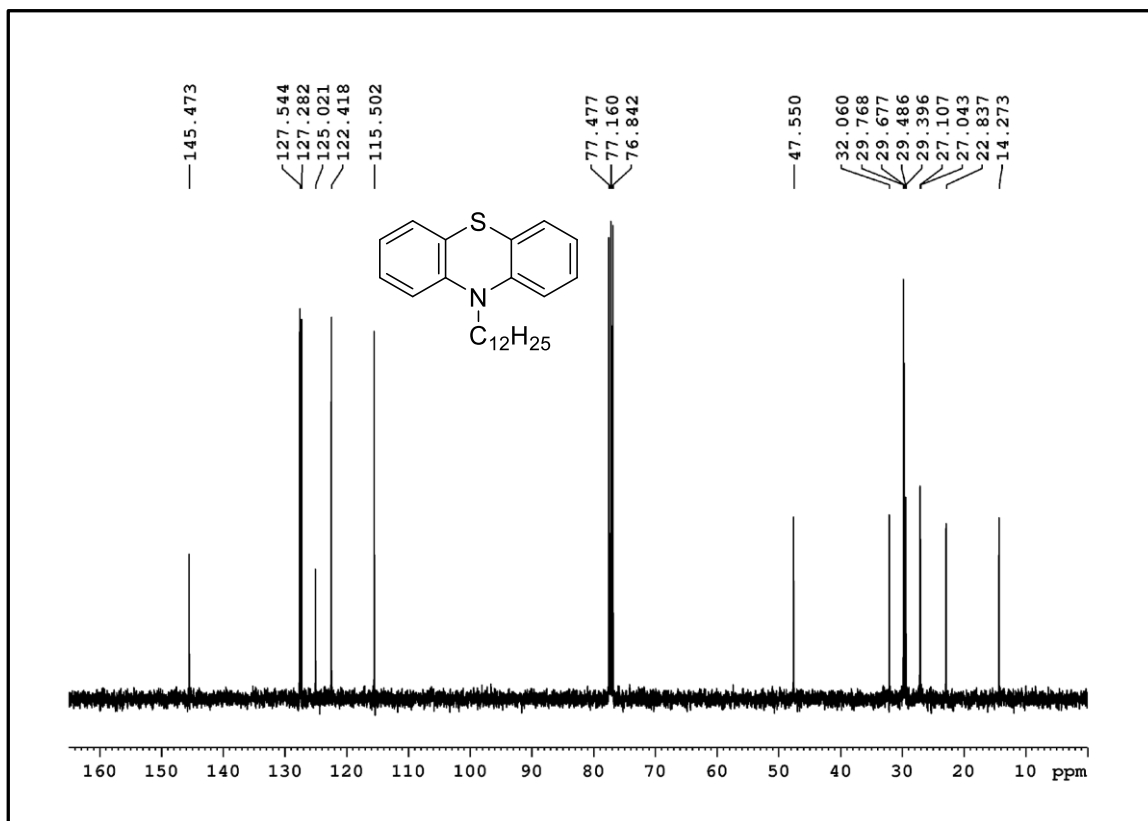

248

249 Figure S4. 400 MHz <sup>13</sup>C NMR spectrum of **8b** in CDCl<sub>3</sub>.

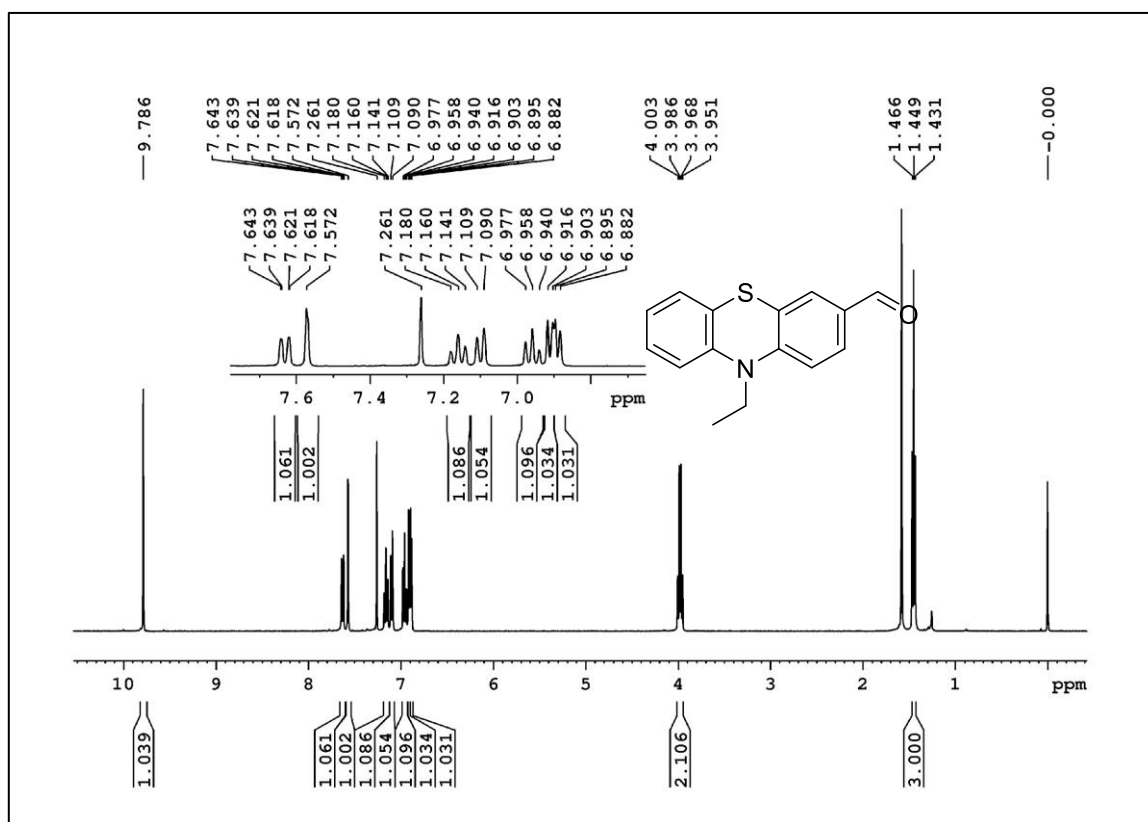

250

251 Figure S5. 400 MHz <sup>1</sup>H NMR spectrum of **7a** in CDCl<sub>3</sub>.

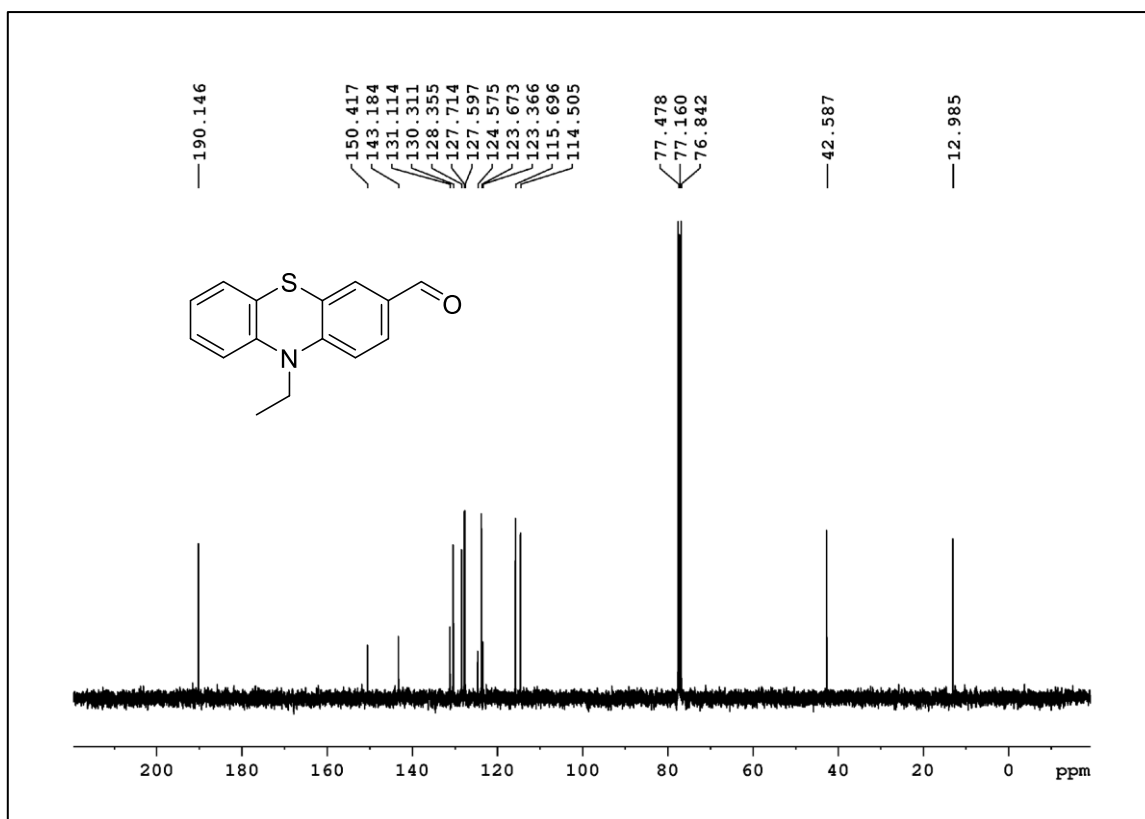

252

253 Figure S6. 400 MHz  $^{13}\text{C}$  NMR spectrum of **7a** in  $\text{CDCl}_3$ .

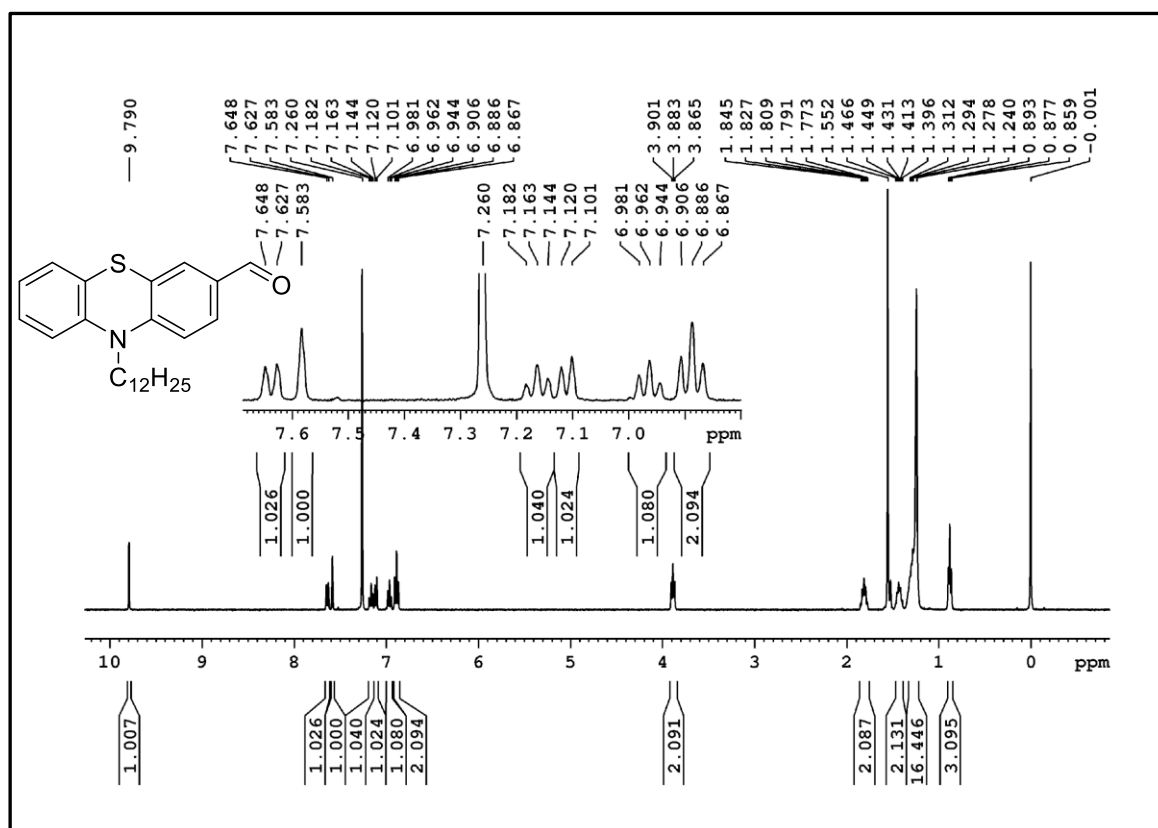

254

255 Figure S7. 400 MHz  $^1\text{H}$  NMR spectrum of **7b** in  $\text{CDCl}_3$ .

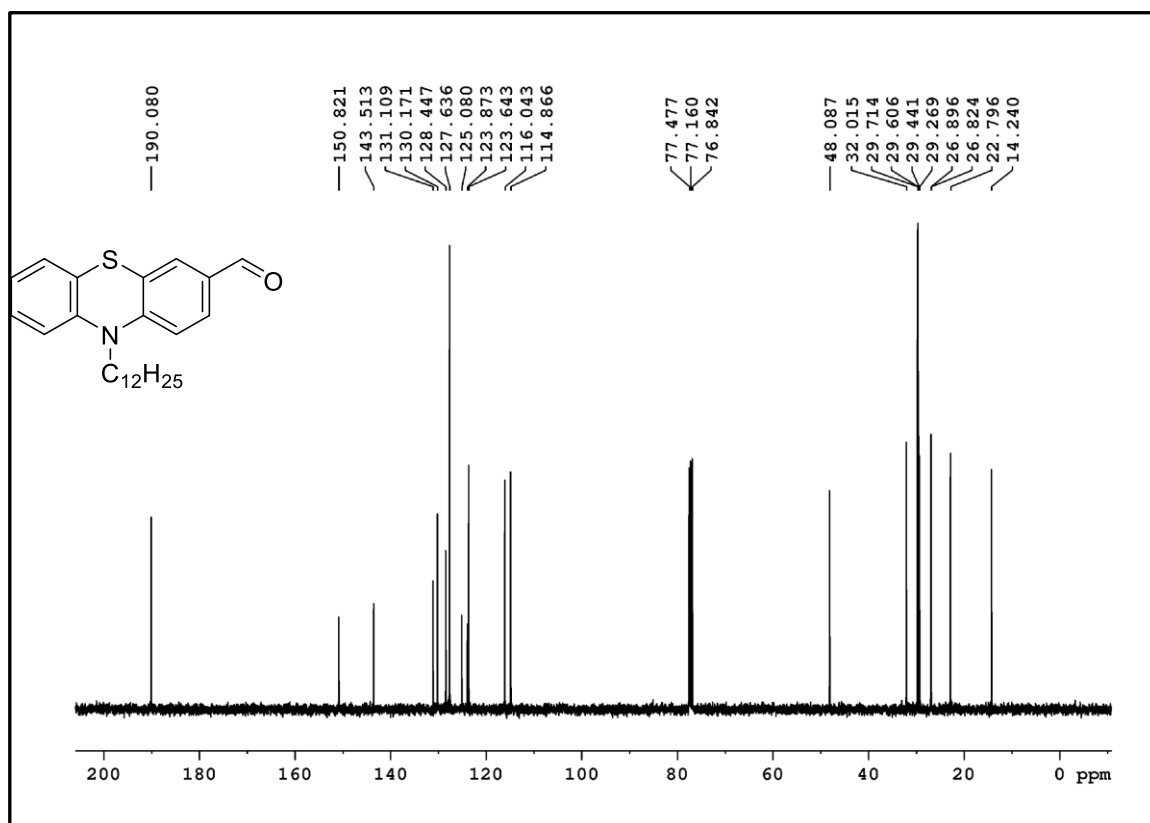

256

257

Figure S8. 400 MHz  $^{13}\text{C}$  NMR spectrum of **7b** in  $\text{CDCl}_3$ .

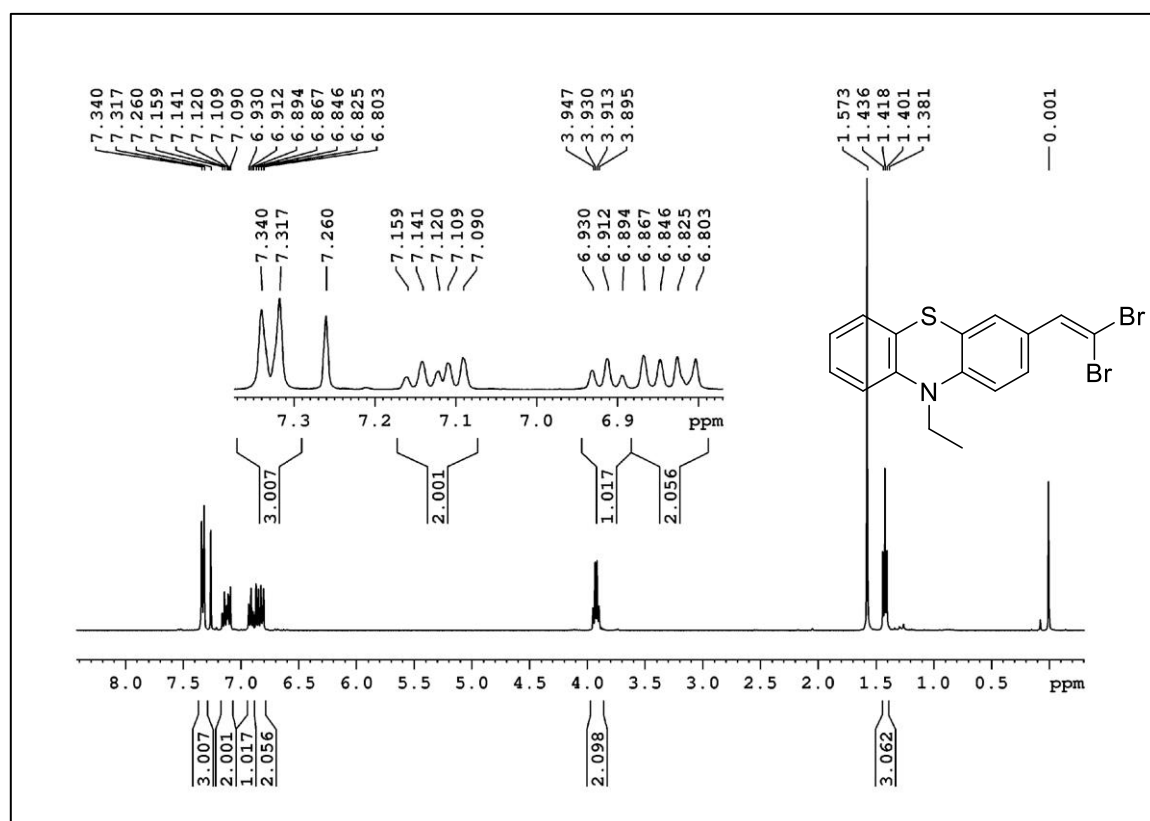

258

259

Figure S9. 400 MHz  $^1\text{H}$  NMR spectrum of **6a** in  $\text{CDCl}_3$ .

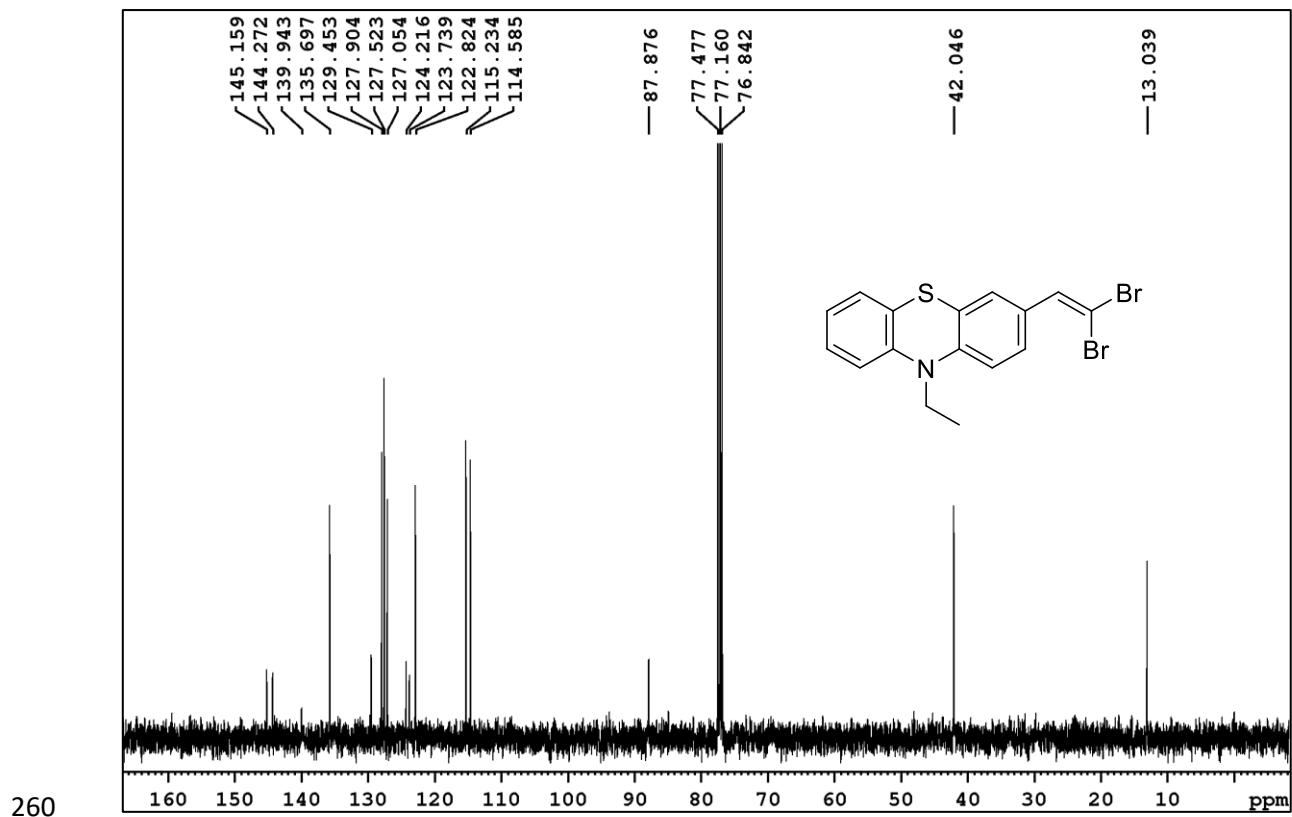

261 Figure S10. 400 MHz  $^1\text{H}$  NMR spectrum of **6a** in  $\text{CDCl}_3$ .

262

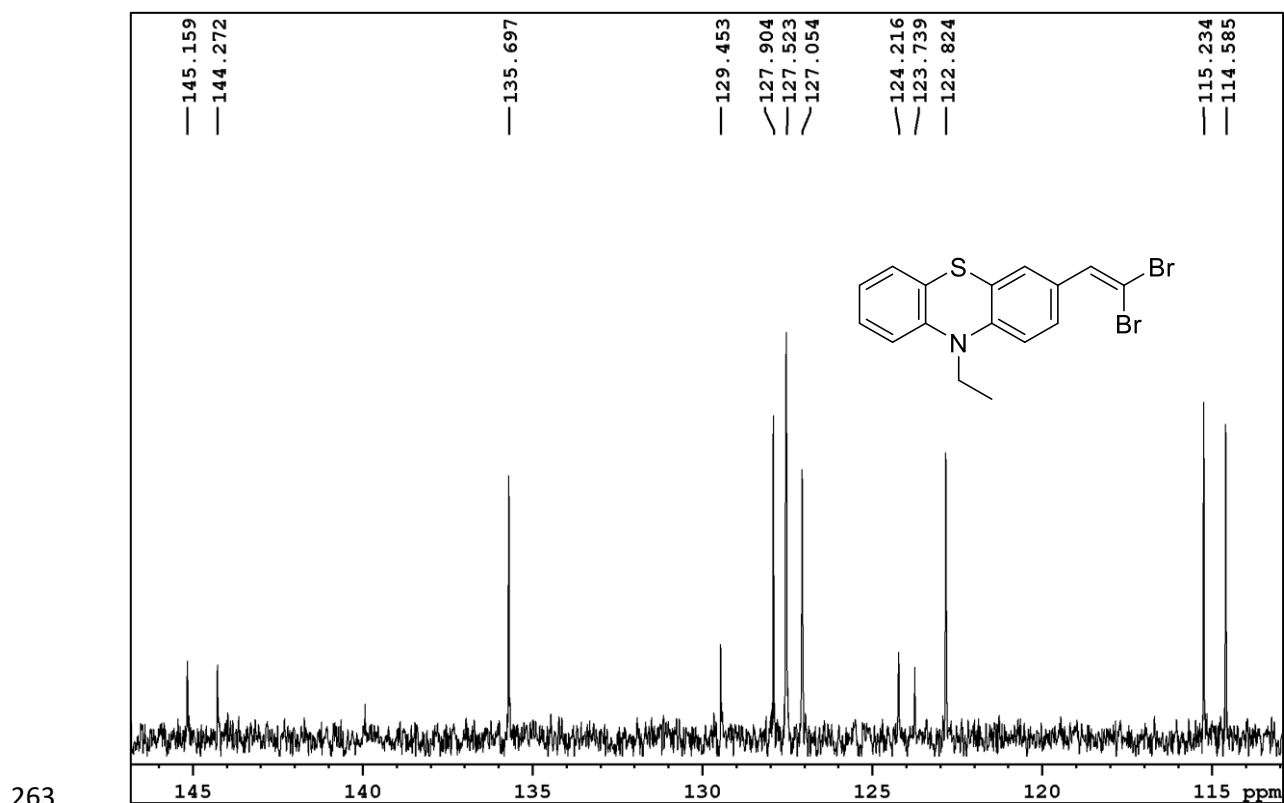

264 Figure S11. 400 MHz  $^{13}\text{C}$  NMR spectrum of **6a** in  $\text{CDCl}_3$ .

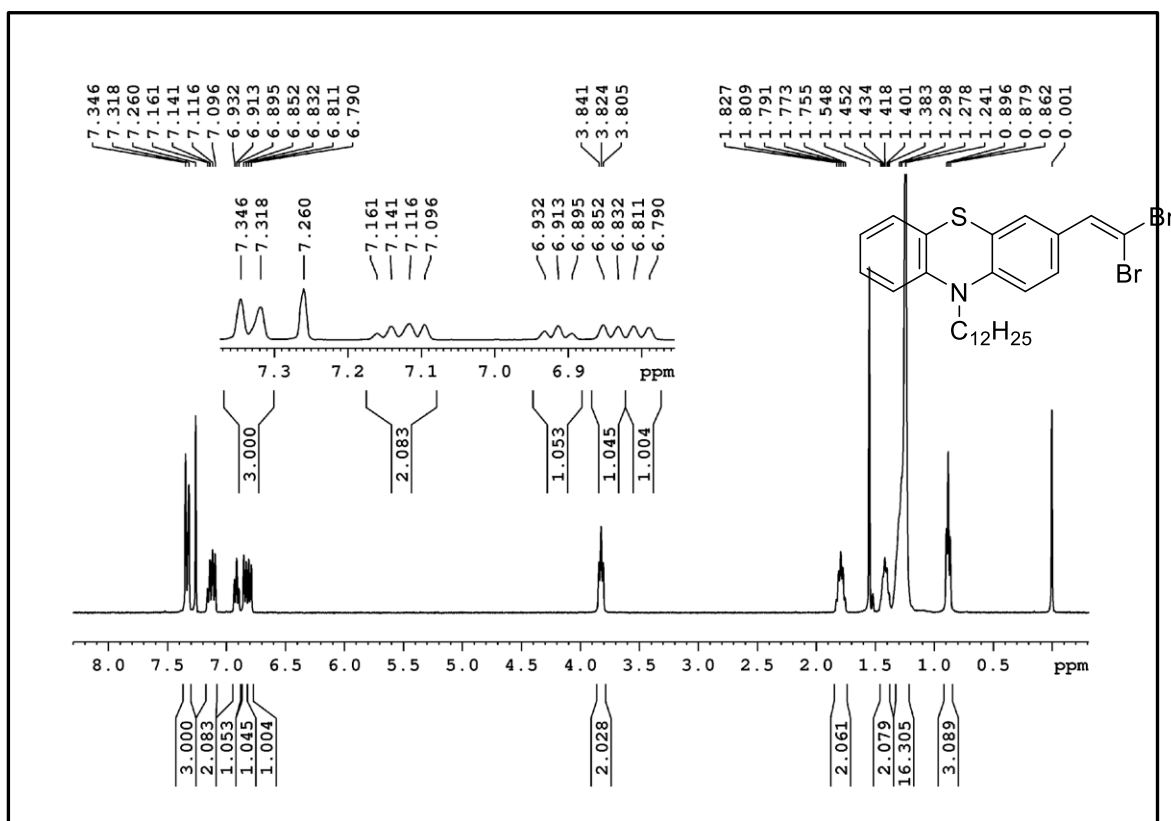

265

266 Figure S12. 400 MHz  $^1\text{H}$  NMR spectrum of **6b** in  $\text{CDCl}_3$ .

267

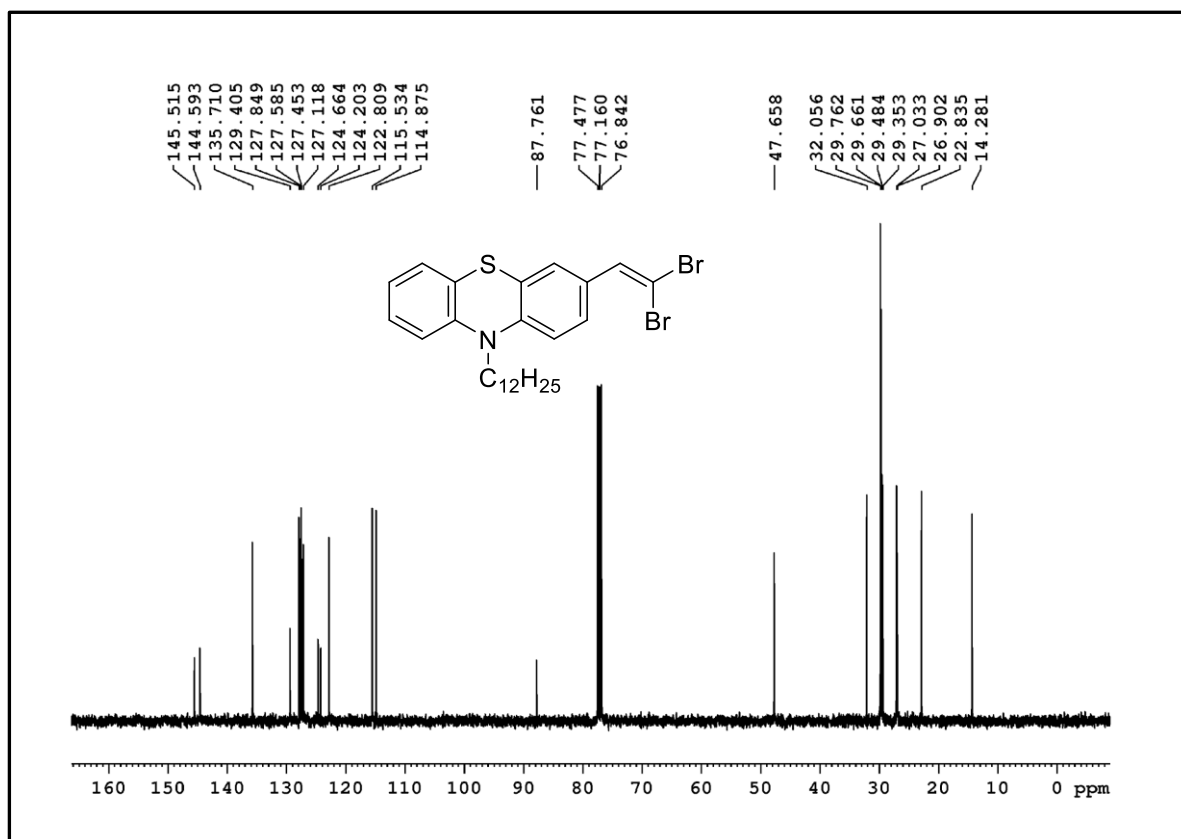

268

269 Figure S13. 400 MHz  $^{13}\text{C}$  NMR spectrum of **6b** in  $\text{CDCl}_3$ .

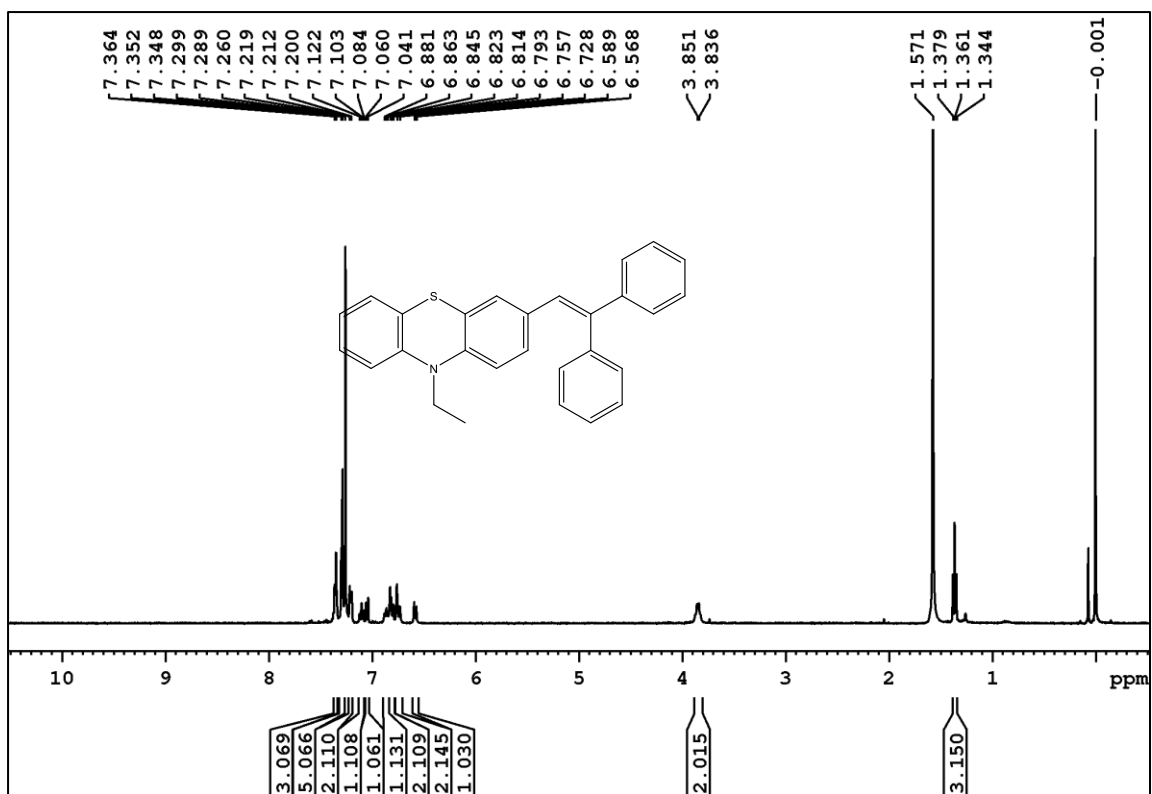

270

271

Figure S14. 400 MHz  $^1\text{H}$  NMR spectrum of **1a** in  $\text{CDCl}_3$ .

272

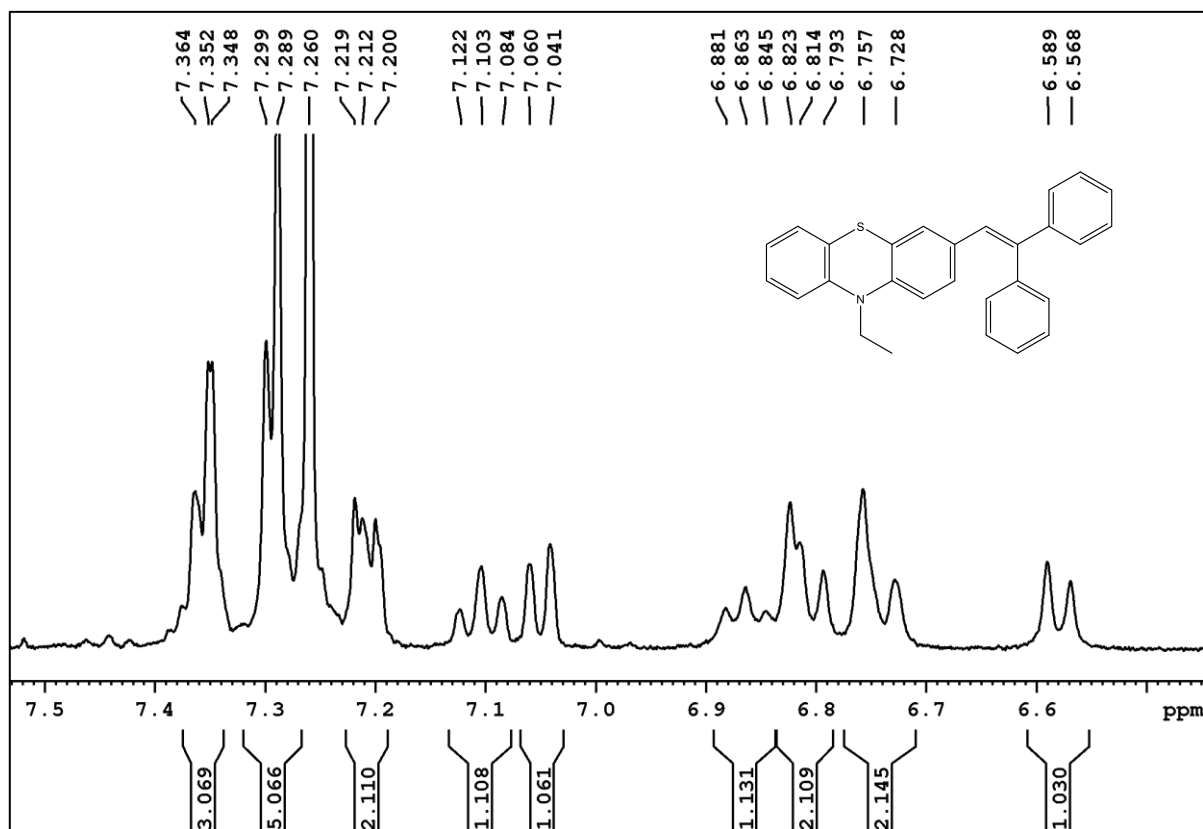

273

274

Figure S15. 400 MHz  $^1\text{H}$  NMR (expanded) spectrum of **1a** in  $\text{CDCl}_3$ .

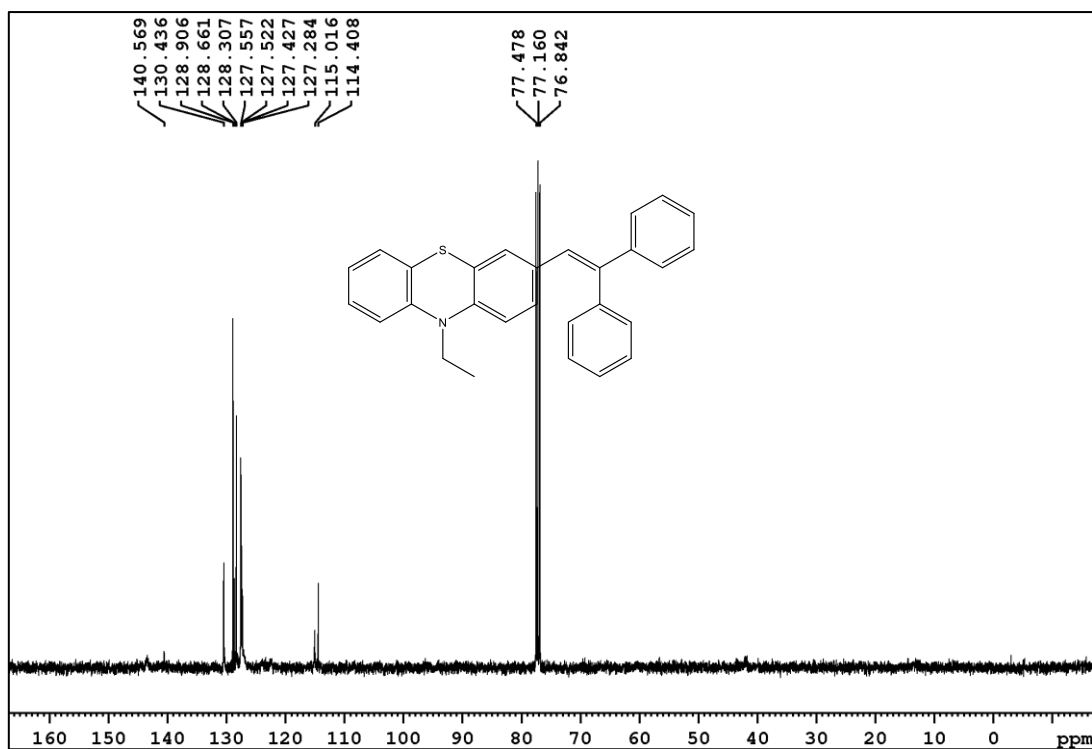

275

276 Figure S16. 400 MHz <sup>13</sup>C NMR spectrum of 1a in CDCl<sub>3</sub>.

277

278

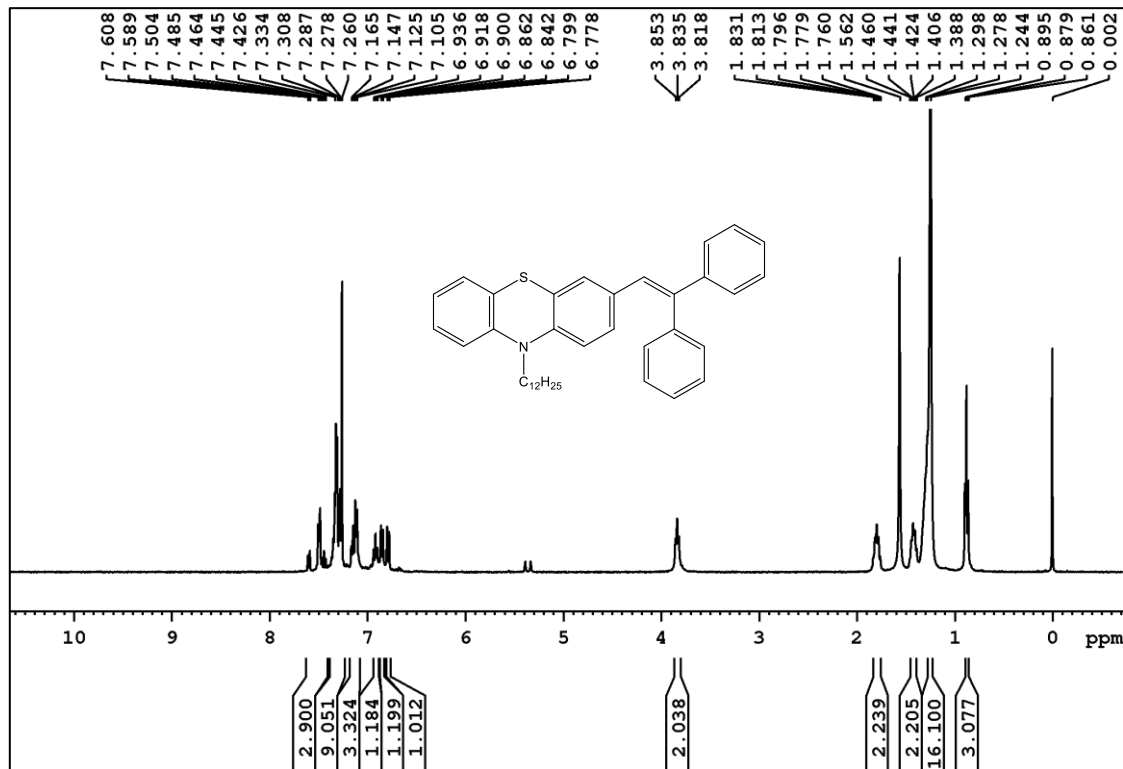

279

280 Figure S17. 400 MHz <sup>1</sup>H NMR spectrum of 2a in CDCl<sub>3</sub>.



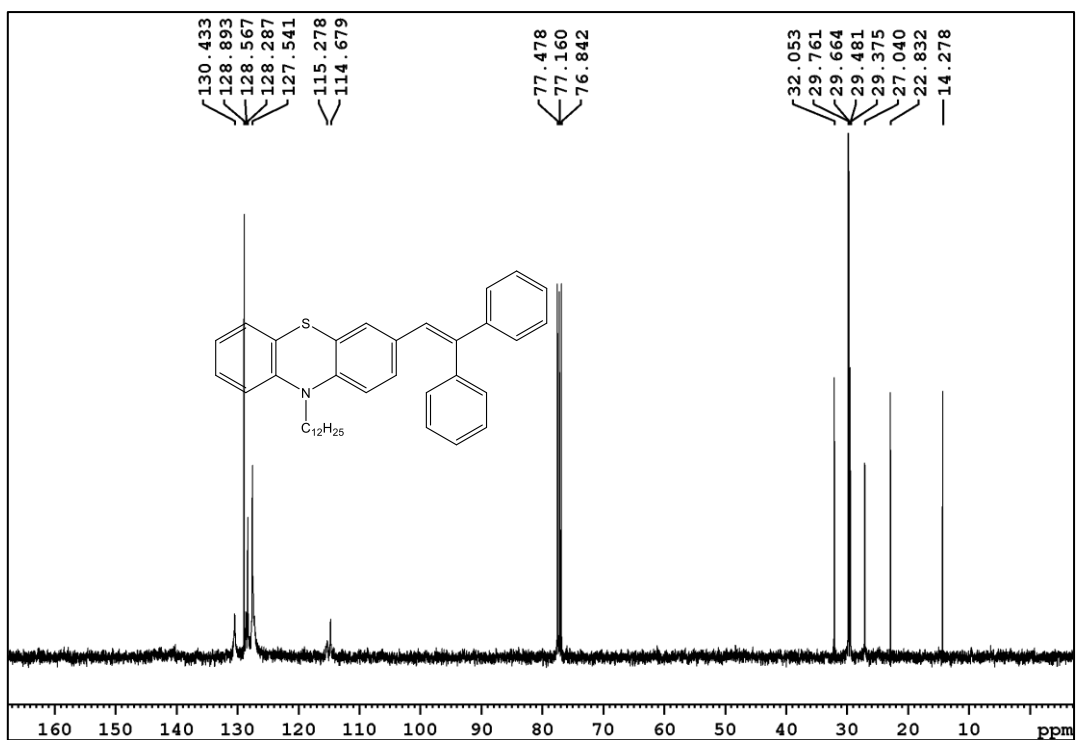

281

282 Figure S18. 400 MHz <sup>13</sup>C NMR spectrum of **1b** in CDCl<sub>3</sub>.

283

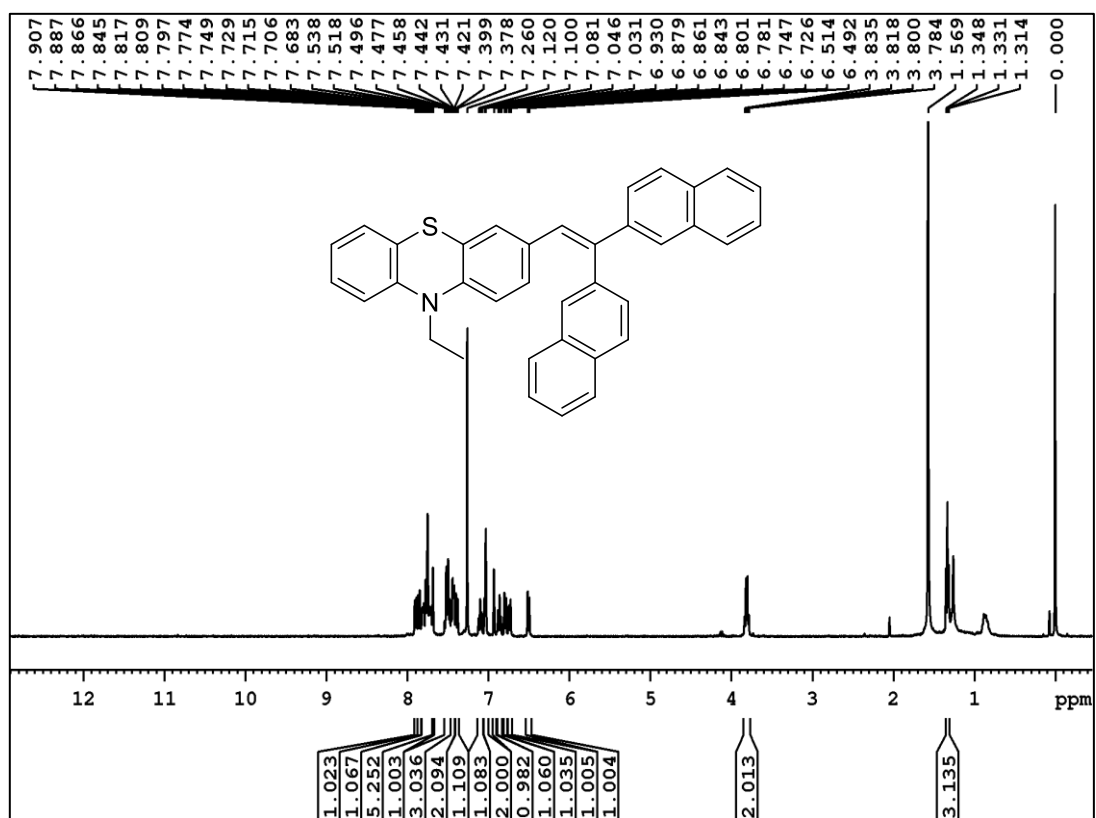

284

285 Figure S19. 400 MHz <sup>1</sup>H NMR spectrum of **2a** in CDCl<sub>3</sub>.

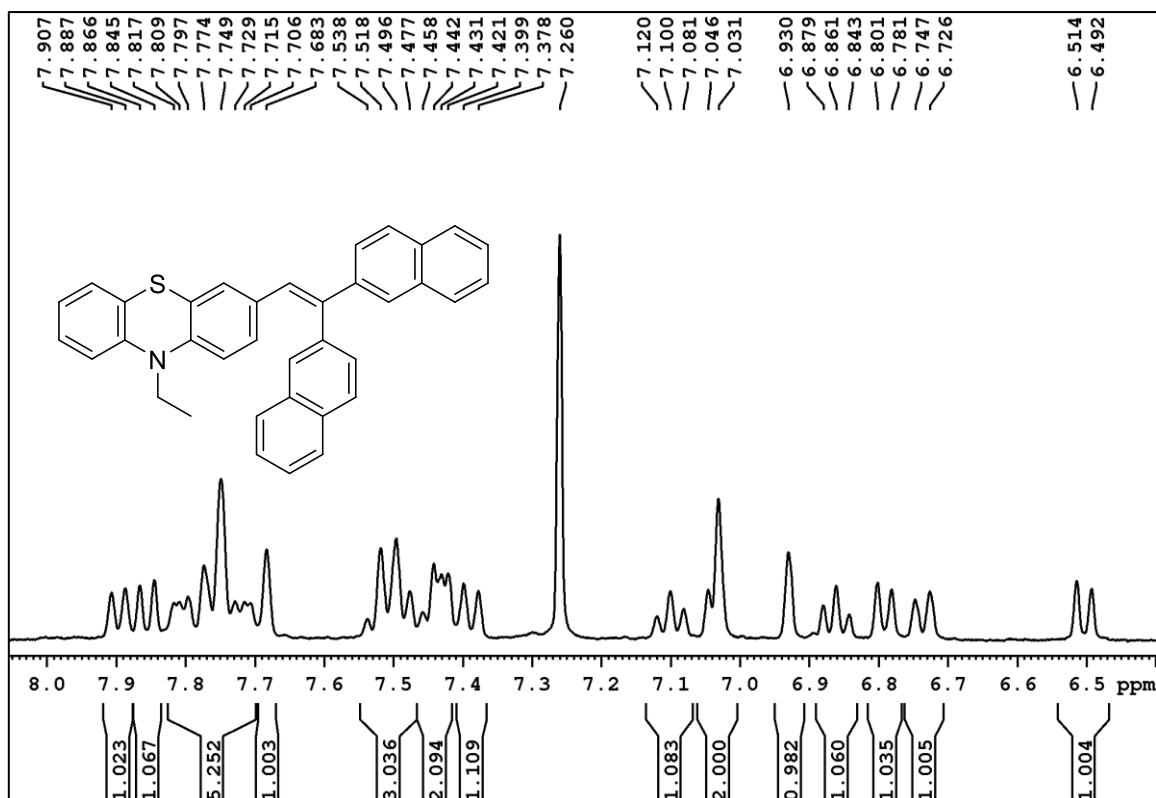

286

287

Figure S20. 400 MHz <sup>1</sup>H NMR (expanded) spectrum of 2a in CDCl<sub>3</sub>.

288

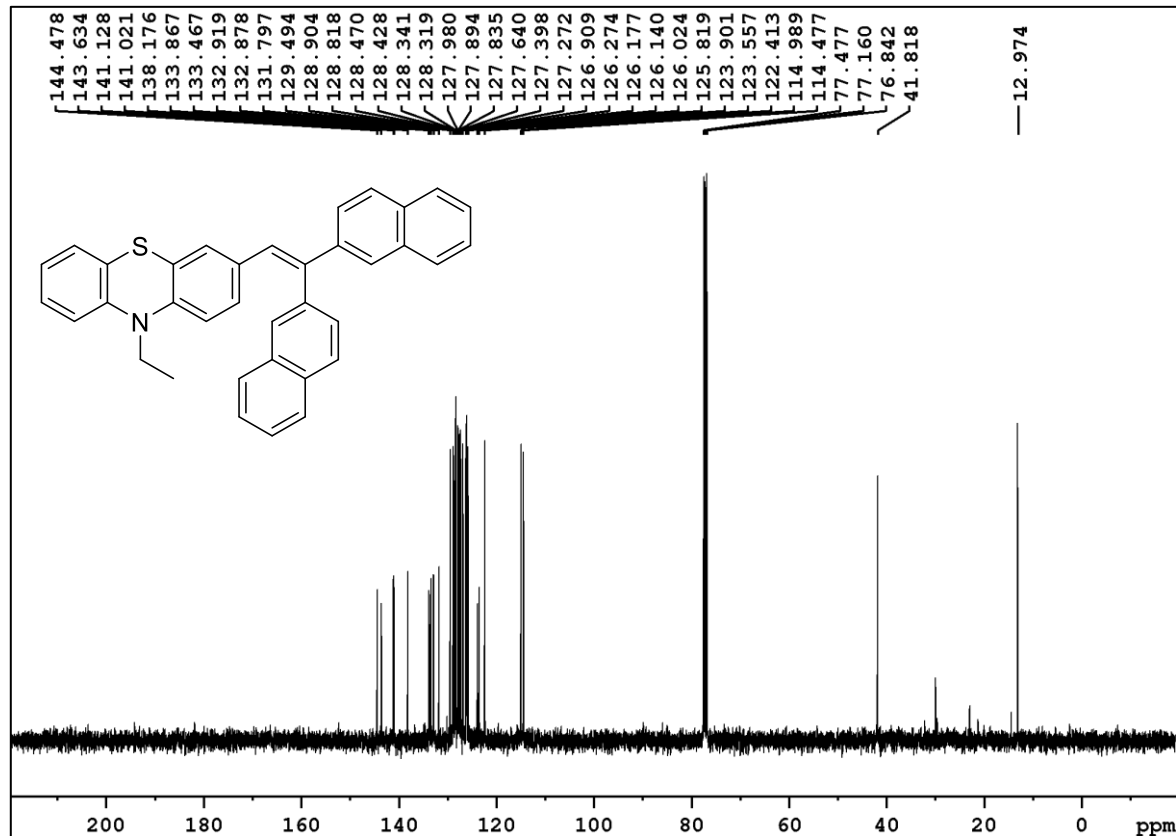

289

290

Figure S21. 100 MHz <sup>13</sup>C NMR spectrum of 2a in CDCl<sub>3</sub>.

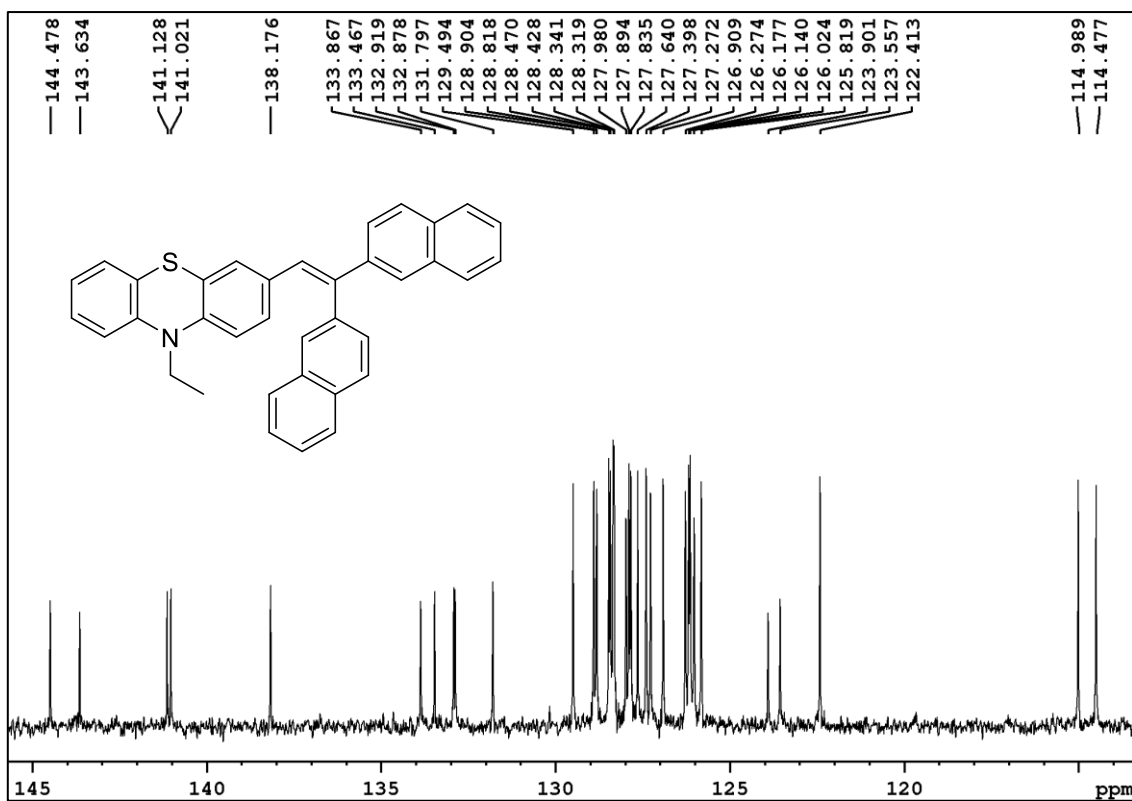

291

292

Figure S22. 100 MHz <sup>13</sup>C NMR (expanded) spectrum of 2a in CDCl<sub>3</sub>.

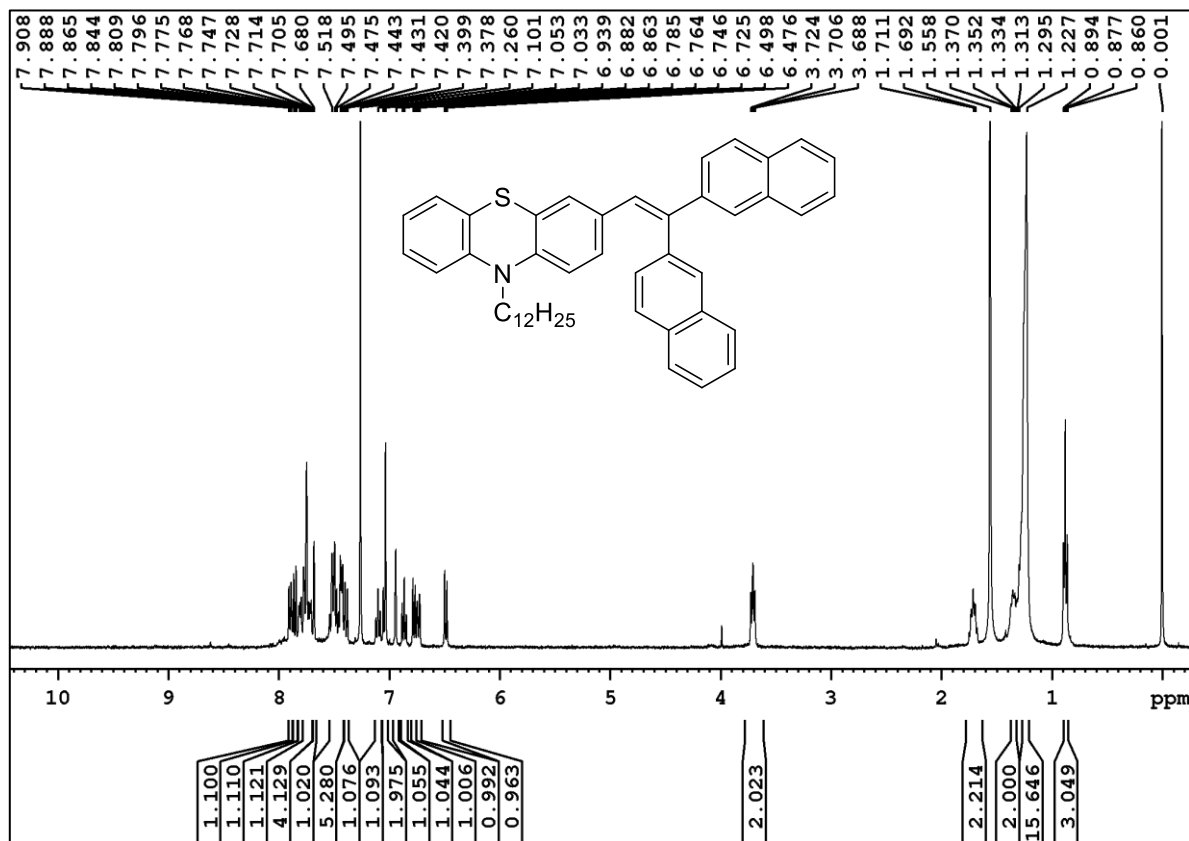

293

294

Figure S23. 400 MHz <sup>1</sup>H NMR spectrum of 2b in CDCl<sub>3</sub>.

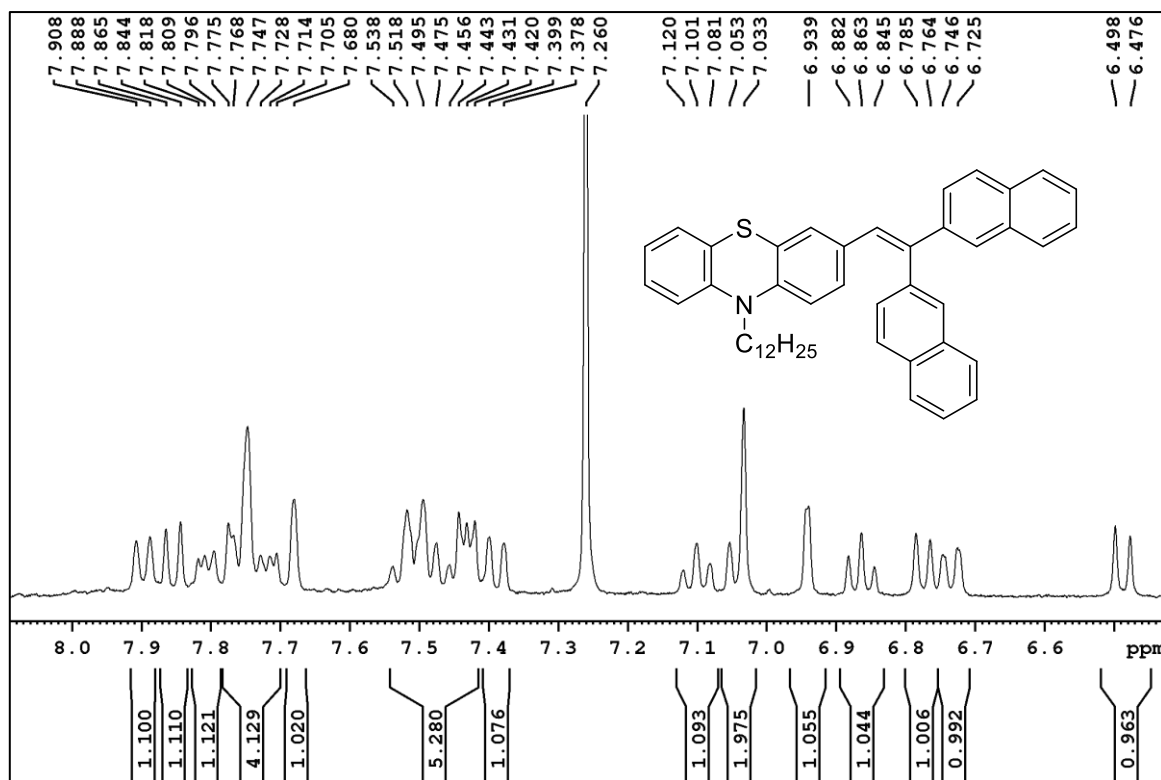

295

296

Figure S24. 400 MHz  $^1H$  NMR (expanded) spectrum of **2b** in  $CDCl_3$ .

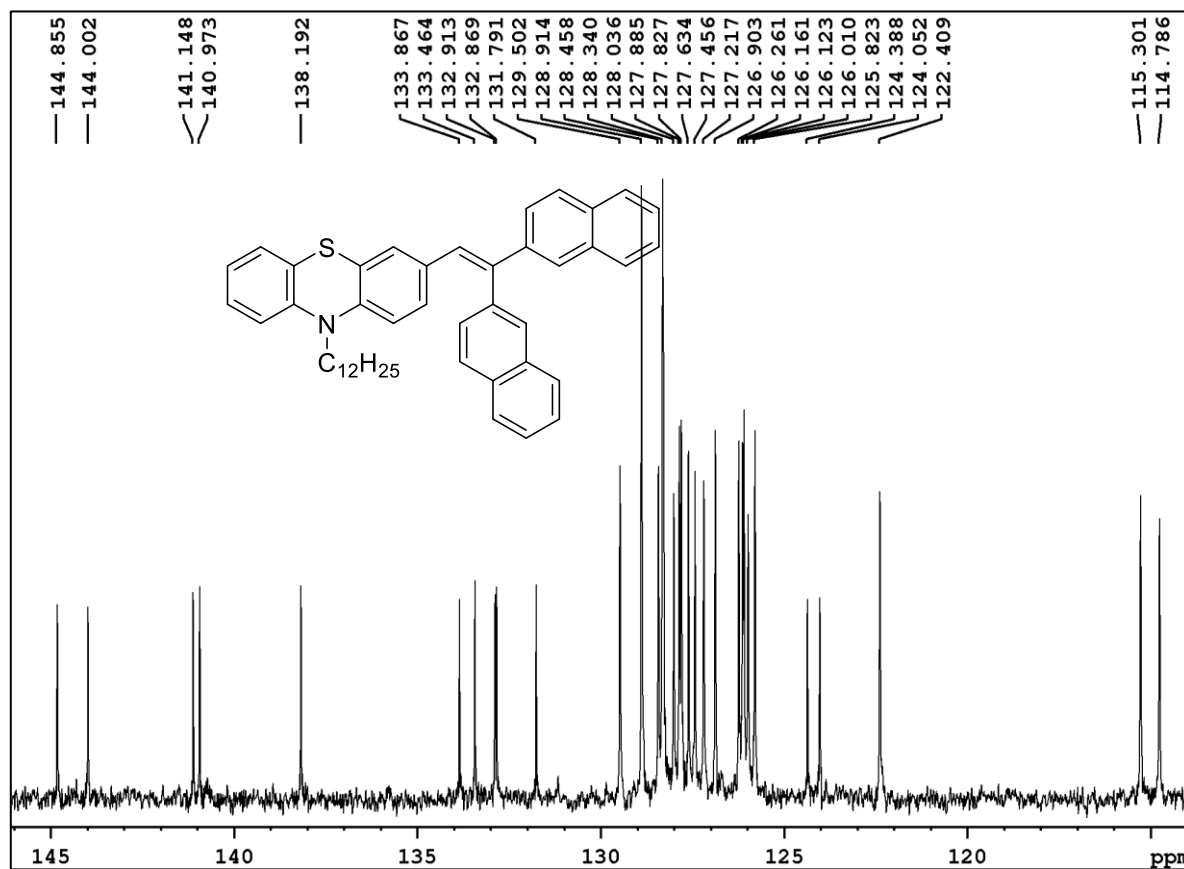

297

298

Figure S25. 400 MHz  $^{13}C$  NMR (expanded) spectrum of **2b** in  $CDCl_3$ .

299

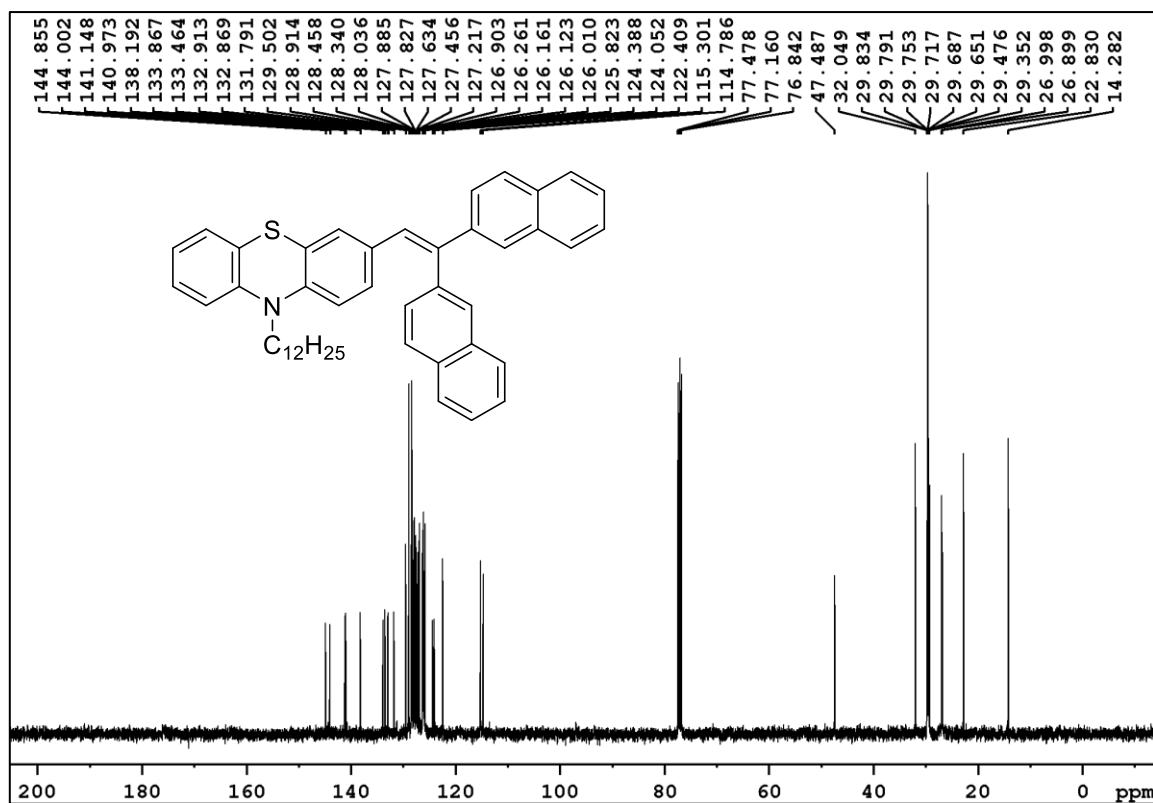300 Figure S26. 400 MHz  $^{13}\text{C}$  NMR spectrum of **2b** in  $\text{CDCl}_3$ .

301

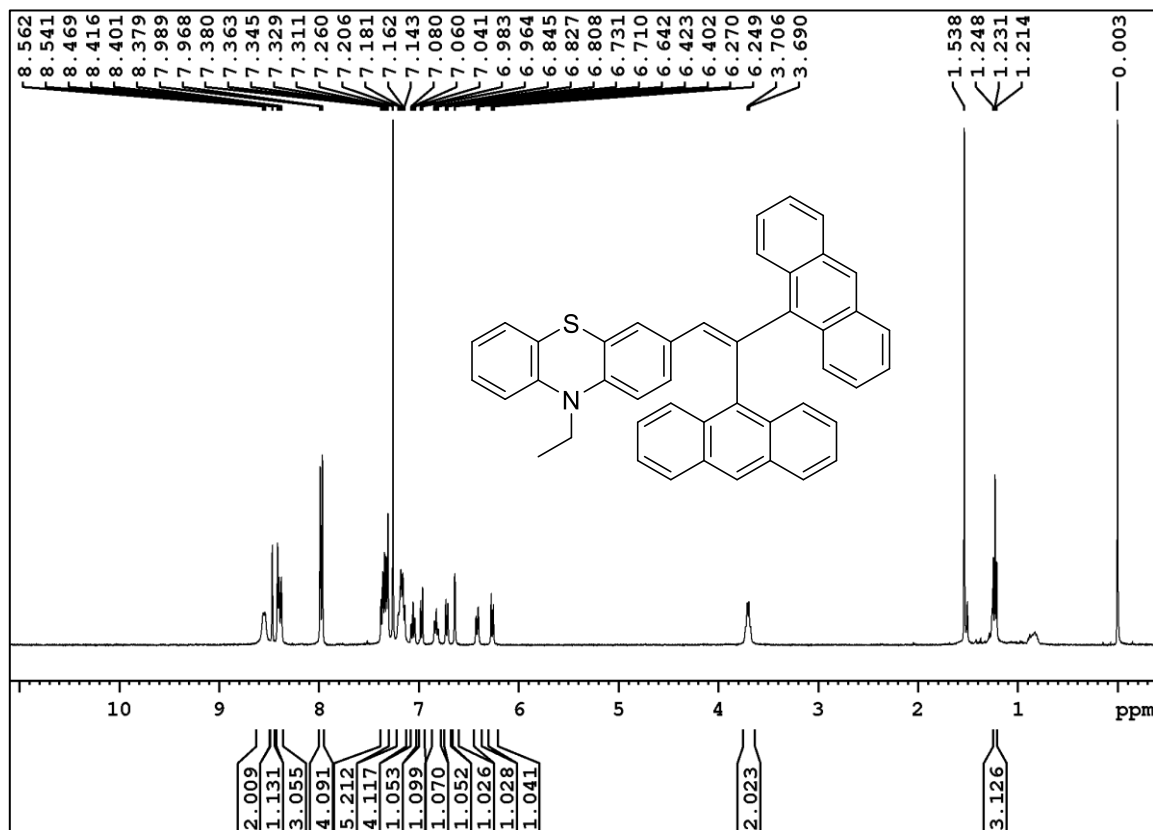302 Figure S27. 400 MHz  $^1\text{H}$  NMR spectrum of **3** in  $\text{CDCl}_3$ .

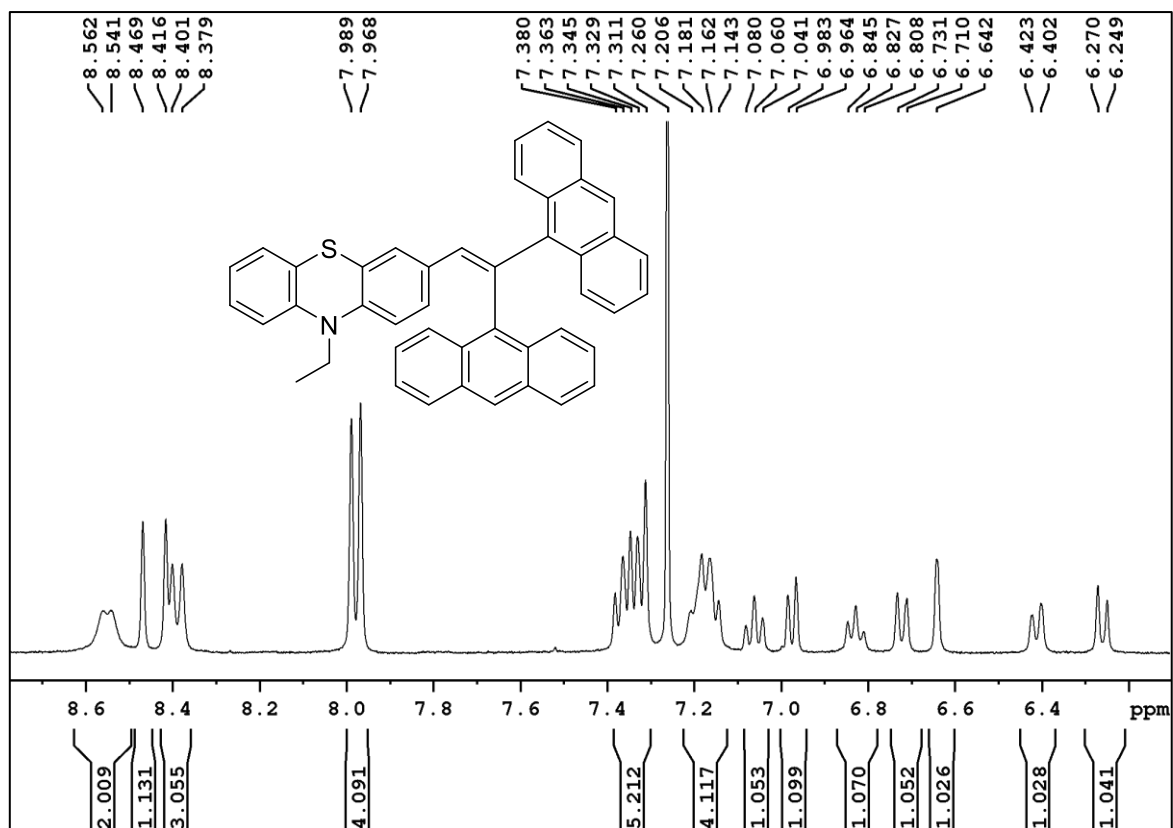

303

304

Figure S28. 400 MHz  $^1\text{H}$  NMR (expanded) spectrum of **3** in  $\text{CDCl}_3$ .

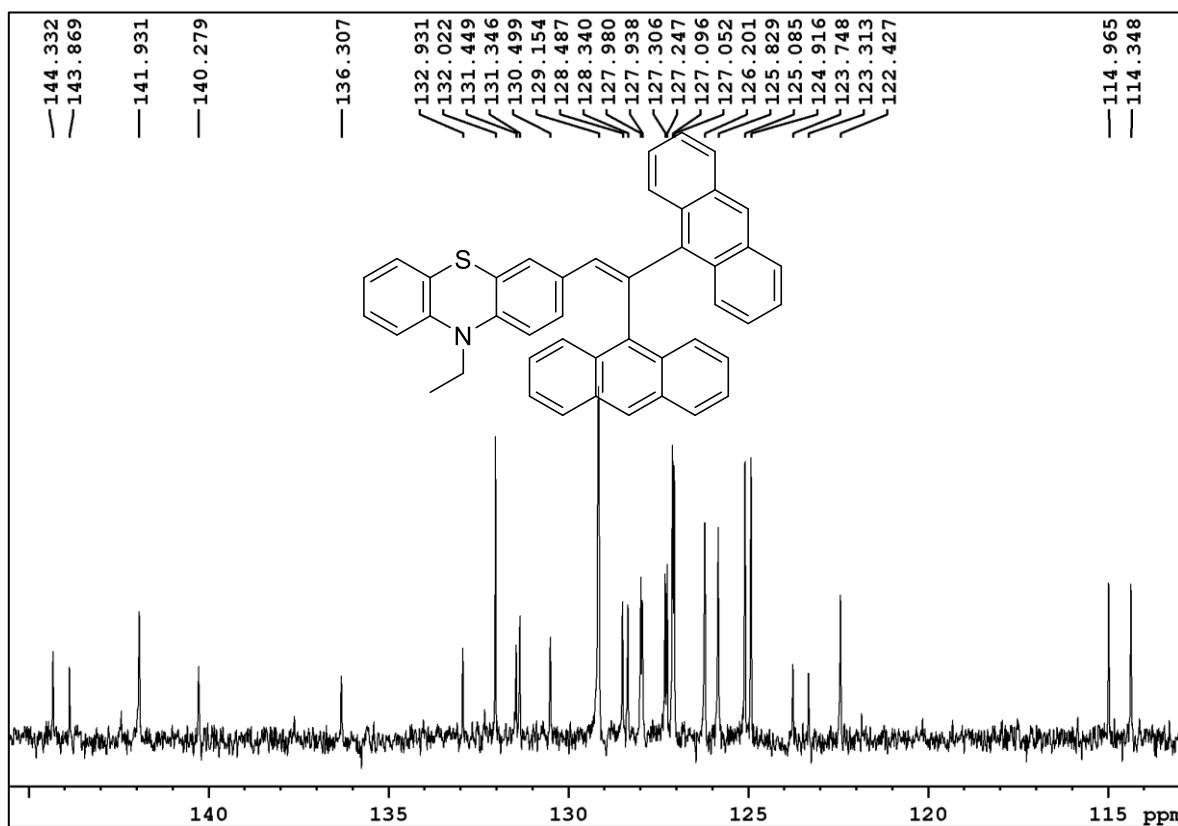

305

306

Figure S29. 100 MHz  $^{13}\text{C}$  NMR (expanded) spectrum of **3** in  $\text{CDCl}_3$ .

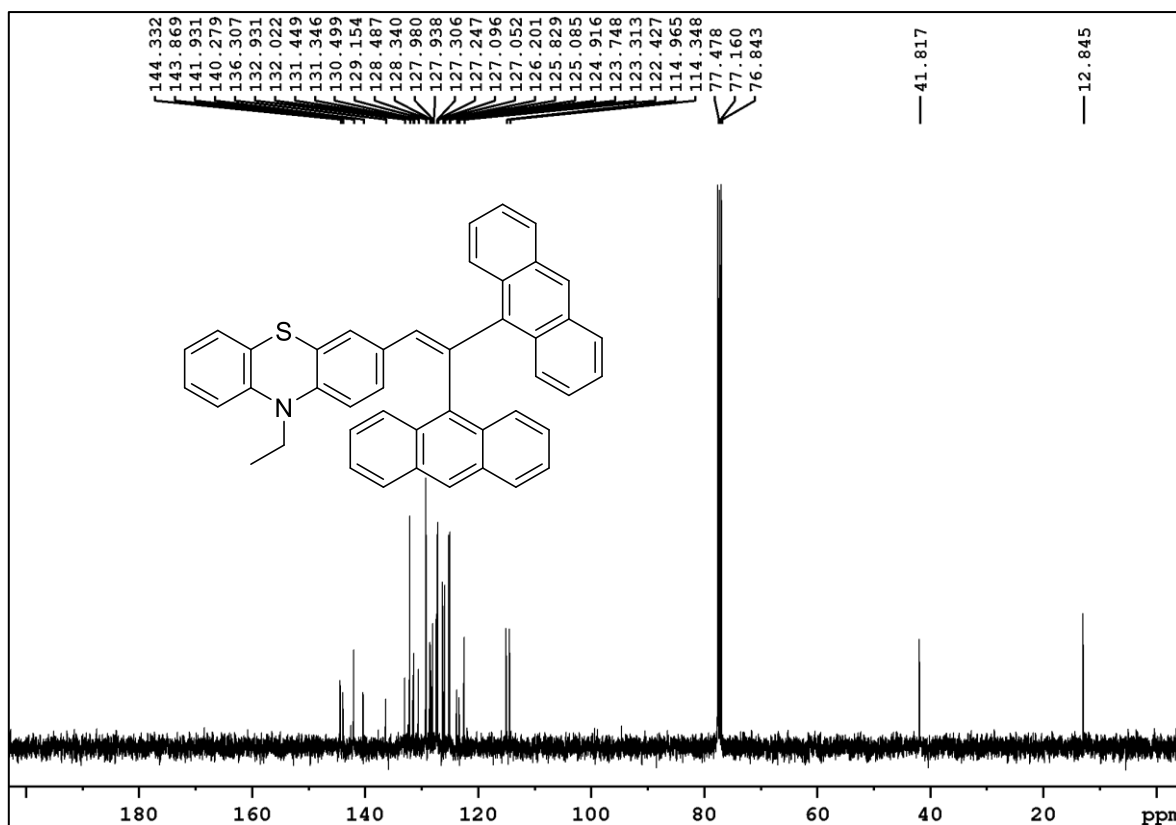

307

308

Figure S30. 100 MHz <sup>13</sup>C NMR spectrum of 3 in CDCl<sub>3</sub>.

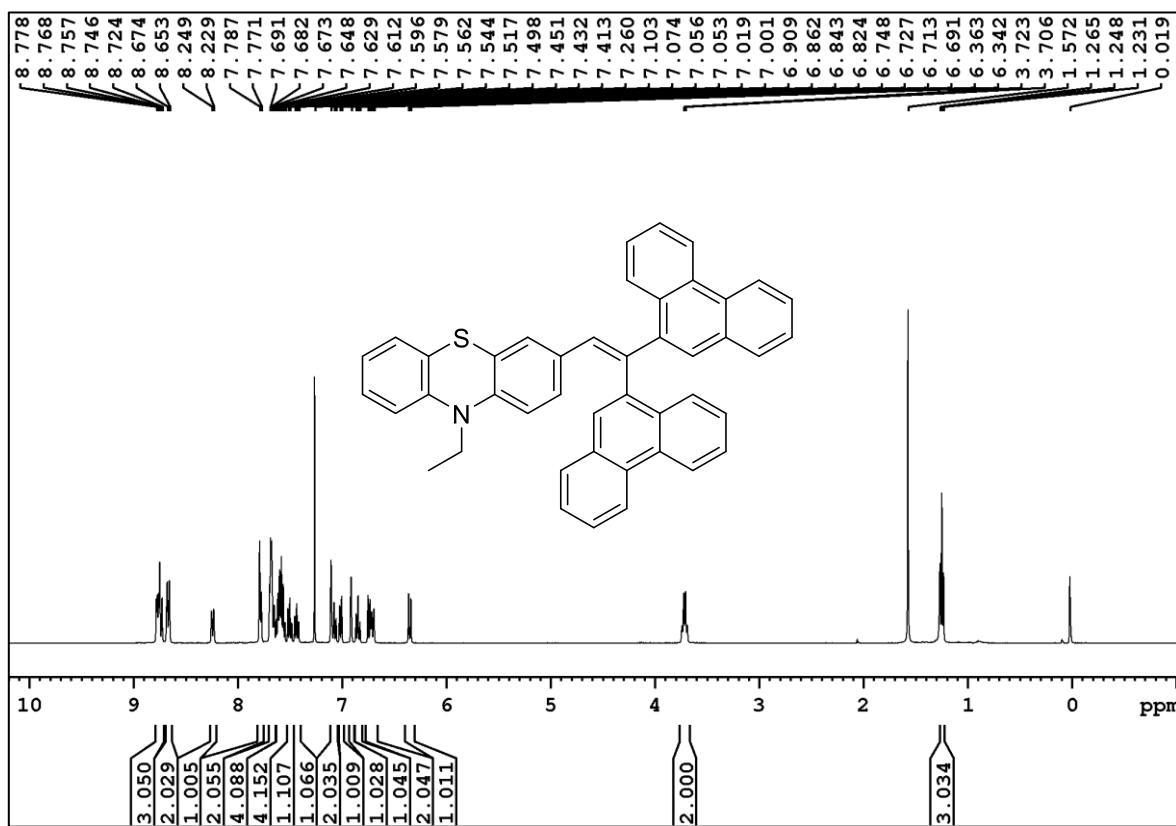

309

310

Figure S31. 400 MHz <sup>1</sup>H NMR spectrum of 4 in CDCl<sub>3</sub>.

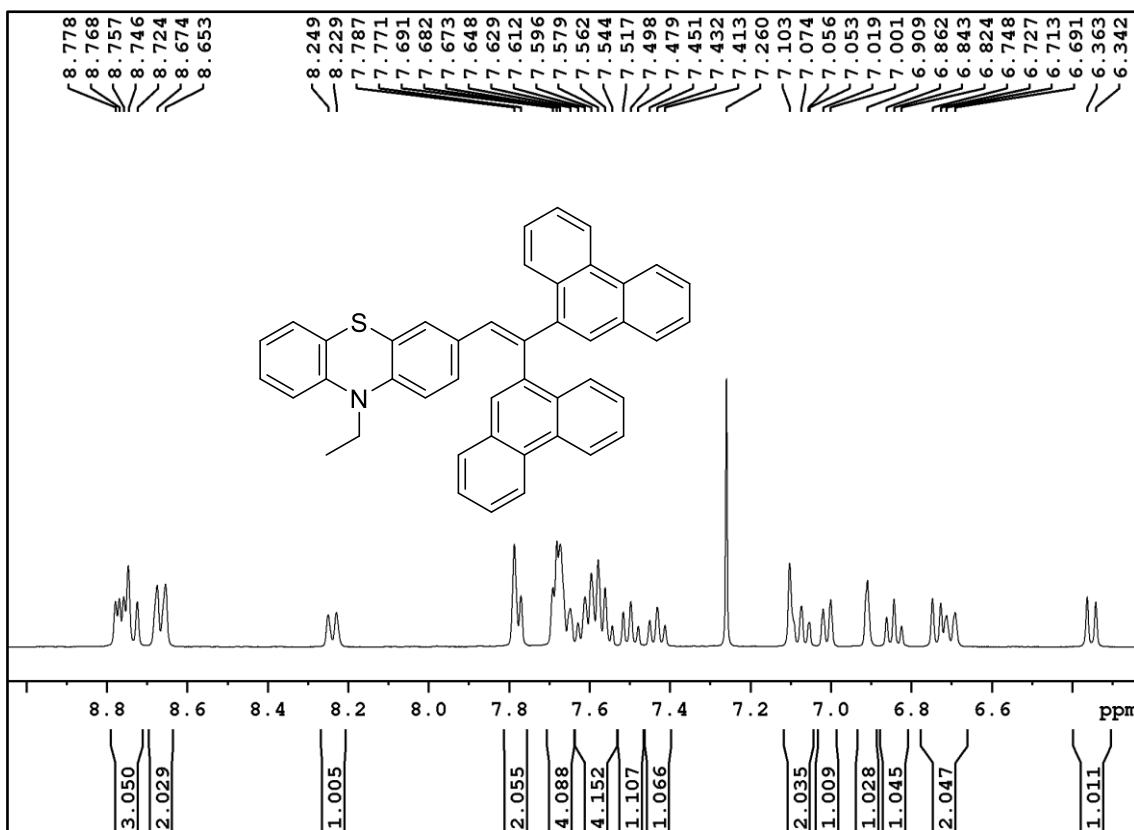

311

312

Figure S32. 400 MHz  $^1\text{H}$  NMR (expanded) spectrum of **4** in  $\text{CDCl}_3$ .

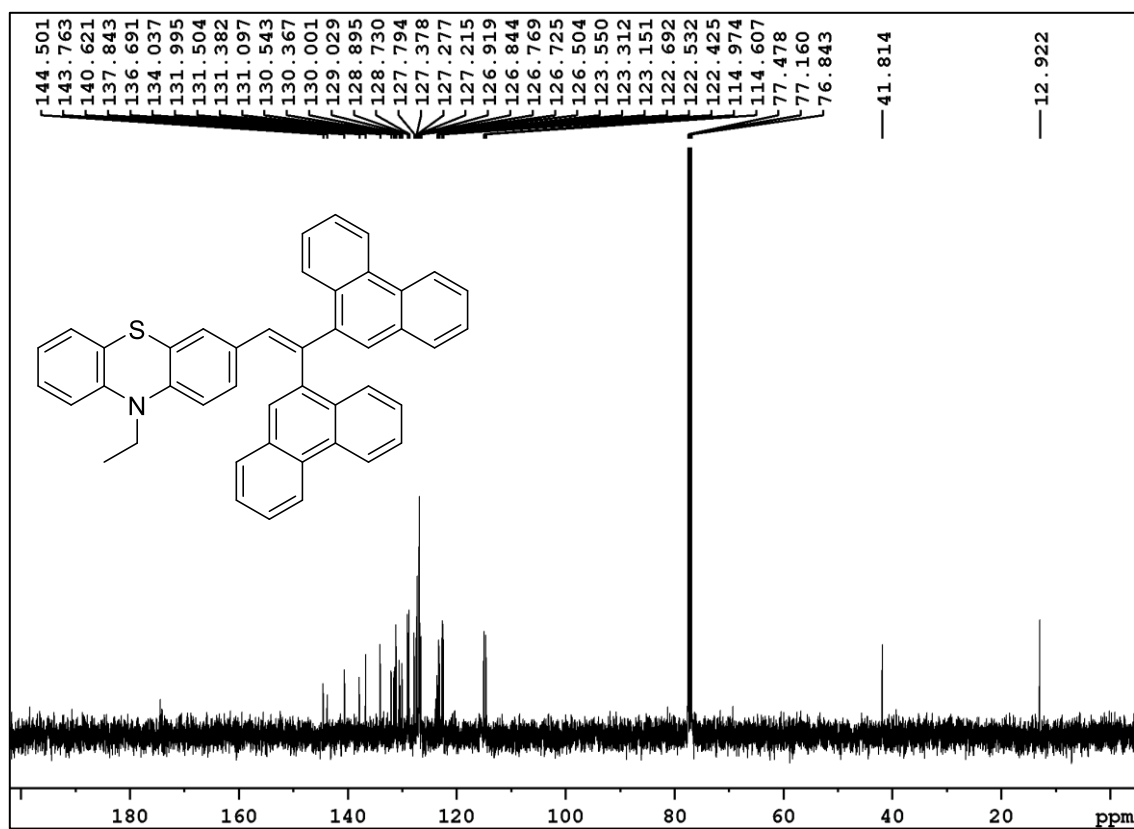

313

314

Figure S33. 100 MHz  $^{13}\text{C}$  NMR spectrum of **4** in  $\text{CDCl}_3$ .



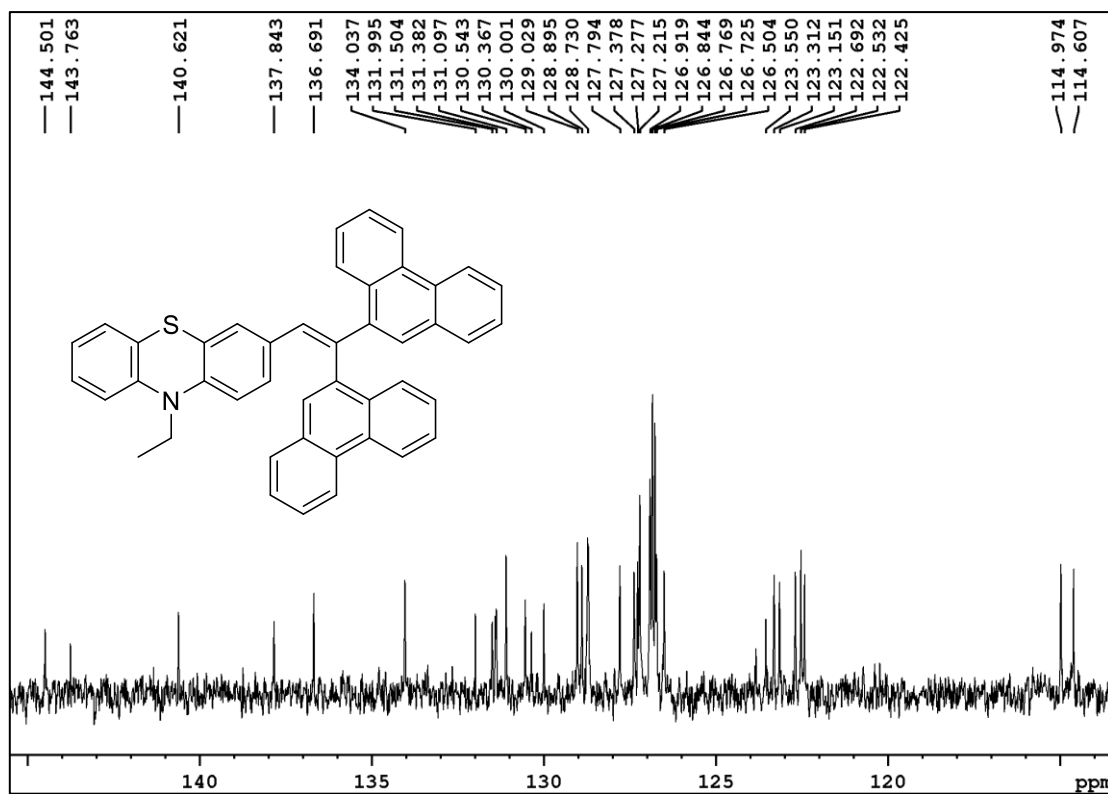

315

316

Figure S34. 100 MHz <sup>13</sup>C NMR (expanded) spectrum of 4 in CDCl<sub>3</sub>.

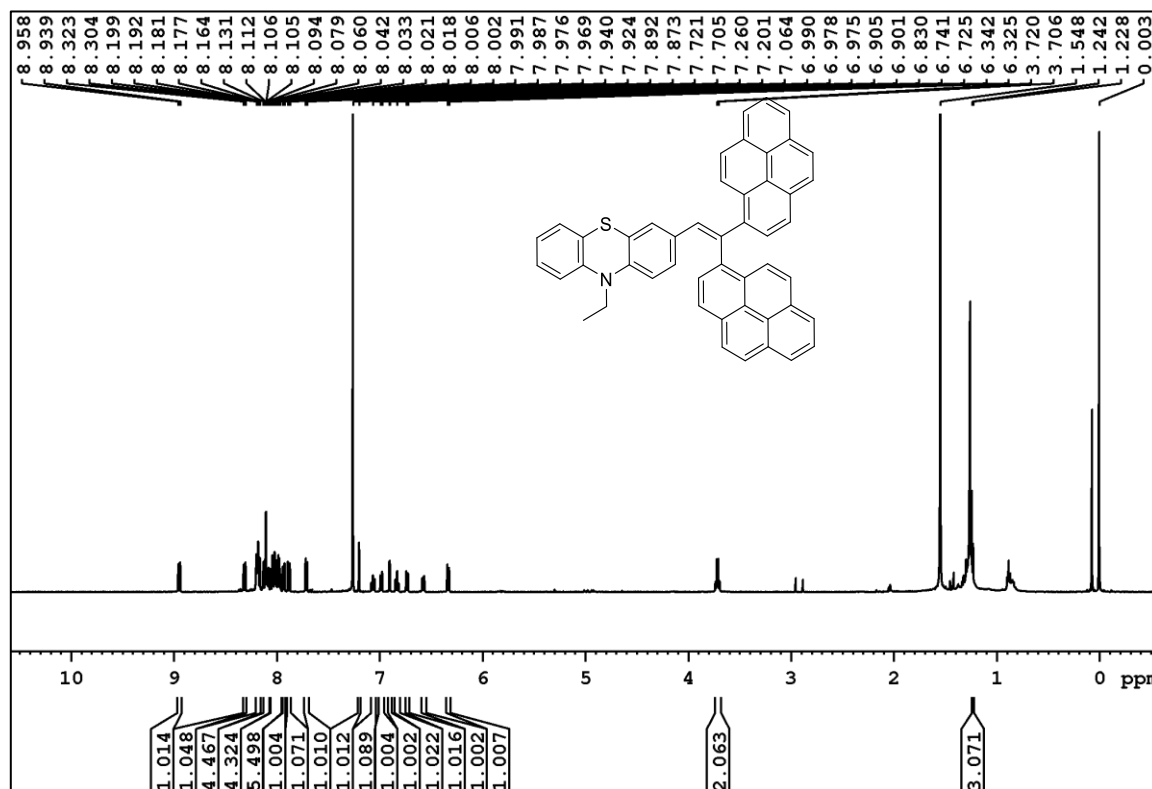

317

318

Figure S35. 100 MHz <sup>1</sup>H NMR spectrum of 5 in CDCl<sub>3</sub>.

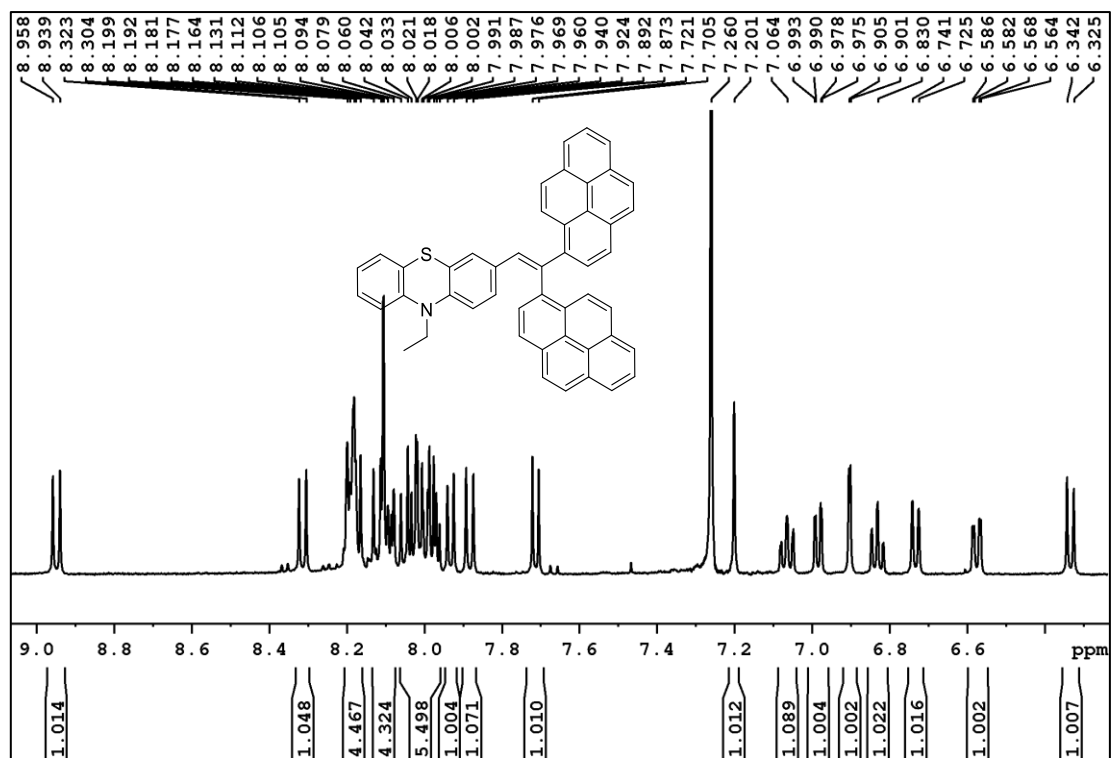

319

320 Figure S36. 100 MHz  $^1\text{H}$  NMR (expanded) spectrum of **5** in  $\text{CDCl}_3$ .

321

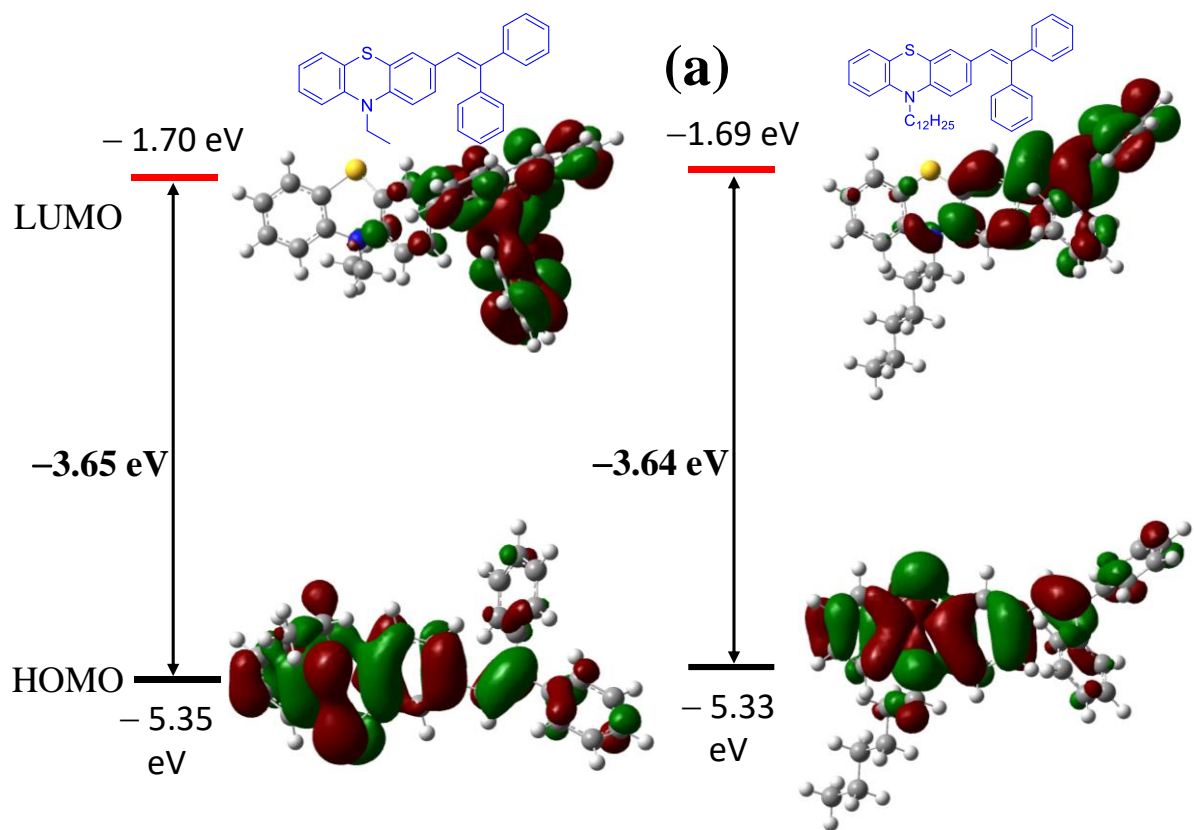

322

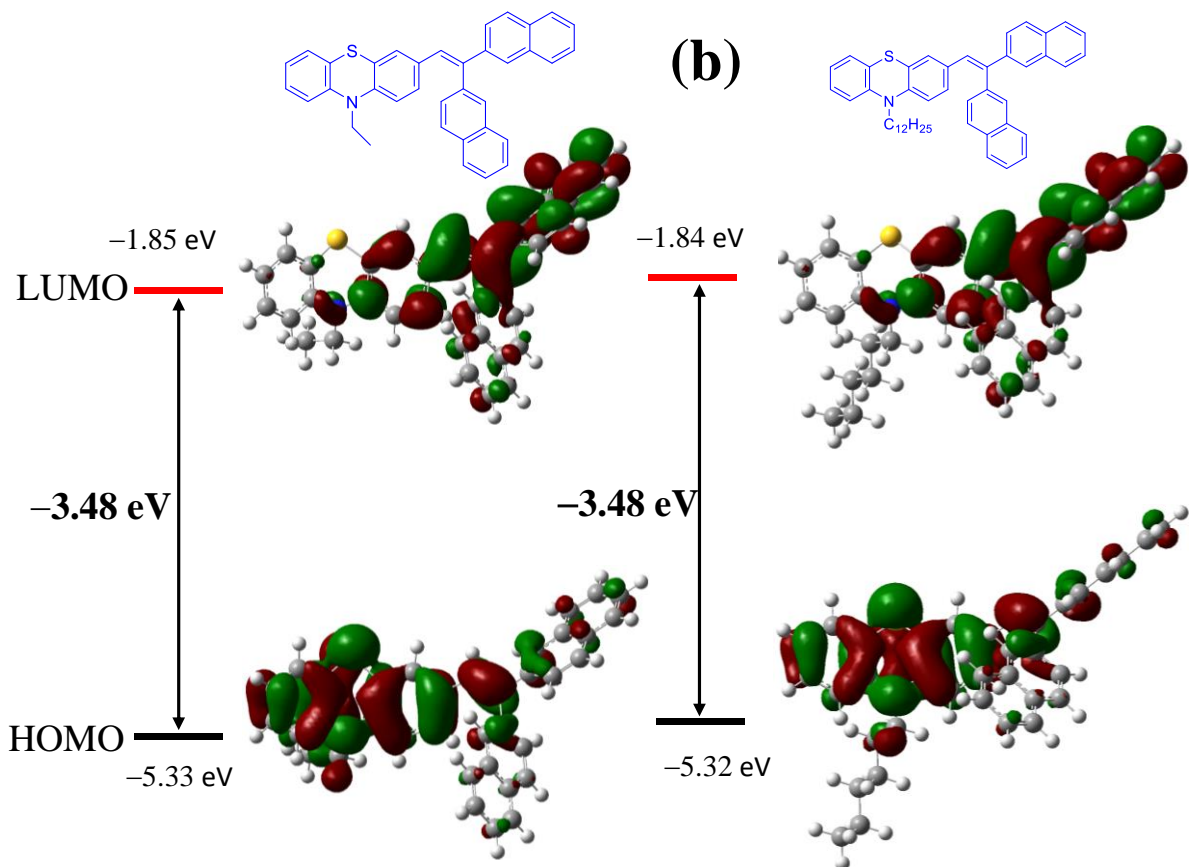

323

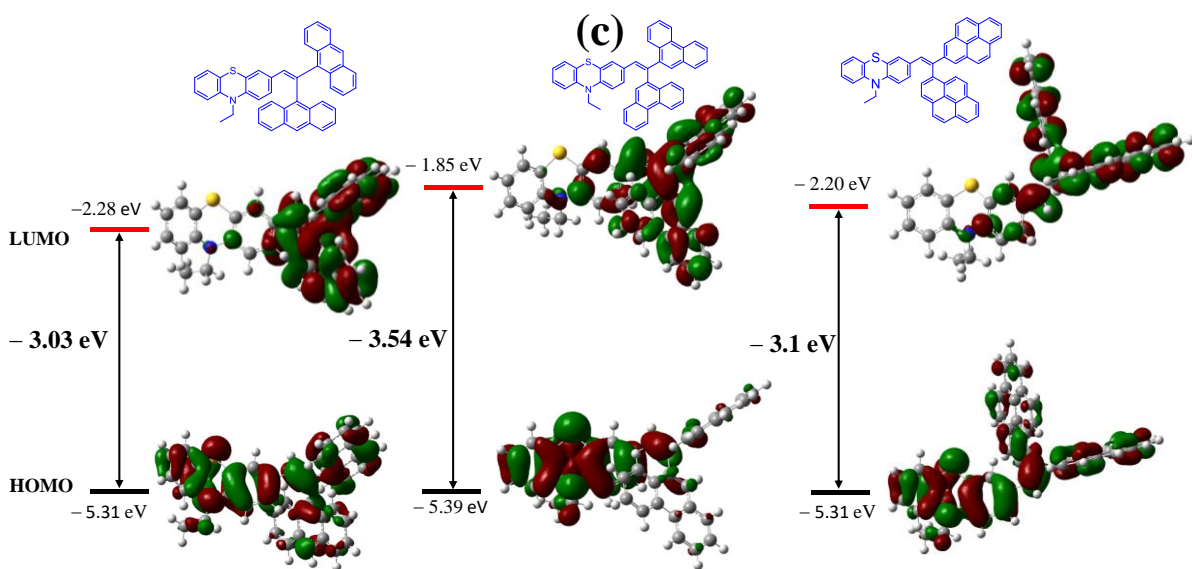

324

325  
326

**Figure S37.** (a) (PT-C2-(Ph)<sub>2</sub> and PT-C12-(Ph)<sub>2</sub>), (b) (PT-C2-(Nap)<sub>2</sub> and PT-C12-(Nap)<sub>2</sub>), (c) (PT-C2-(An)<sub>2</sub>, PT-C2-(Pn)<sub>2</sub>) and PT-C2-(Pr)<sub>2</sub> obtained by the ground state optimization via b3lyp/6-311+g (d, p) level of theory.

327

**Table S1.** Properties obtained from ground state and excited state optimization of PT derivatives

| Compound                  | <sup>a</sup> HOMO (eV) | <sup>b</sup> LUMO (eV) | $\Delta E$ (eV) | <sup>c</sup> $\phi$ (°) | <sup>d</sup> Dev | <sup>e</sup> $\theta$ (°) | $\mu_g$ (D) | $\mu_e$ (D) |
|---------------------------|------------------------|------------------------|-----------------|-------------------------|------------------|---------------------------|-------------|-------------|
| PT-C2-(Ph) <sub>2</sub>   | -5.35                  | -1.70                  | -3.65           | 175, -8                 | 5,8              | 117                       | 3.46        | 3.80        |
| PT-C12-(Ph) <sub>2</sub>  | -5.33                  | -1.69                  | -3.64           | 175, -8                 | 5,8              | 117                       | 3.55        | 3.92        |
| PT-C2-(Nap) <sub>2</sub>  | -5.33                  | -1.85                  | -3.48           | 174, -8                 | 6,8              | 116                       | 3.54        | 3.97        |
| PT-C12-(Nap) <sub>2</sub> | -5.32                  | -1.84                  | -3.48           | 174, -8                 | 6,8              | 116                       | 3.63        | 4.08        |
| PT-C2-(An) <sub>2</sub>   | -5.31                  | -2.28                  | -3.03           | -172, 8                 | 8,8              | 120                       | 3.55        | 4.24        |
| PT-C2-(Pn) <sub>2</sub>   | -5.38                  | -1.85                  | -3.53           | 169, -4                 | 11,4             | 117                       | 3.60        | 4.0         |
| PT-C2-(Pr) <sub>2</sub>   | -5.31                  | -2.21                  | -3.10           | 172, 9                  | 8,9              | 120                       | 3.13        | 3.93        |

328  
329  
330

Where a, b represents theoretically obtained HOMO and LUMO of the compounds in their ground state; c represents the dihedral angle connecting the phenyl ring of PT unit and the phenyl ring of the Ar unit; d represents the deviation from linearity, and e represents the angle between the two Ar units. Also,  $\mu_g$  and  $\mu_e$  represent the ground and excited state dipole moment of the molecule.

331 **Determination of Fluorescence quantum yields**

332 The fluorescence quantum yield (QY) measurements of the as-synthesized PT derivatives were accomplished  
 333 utilizing freshly distilled nitrogen purged dichloromethane (CH<sub>2</sub>Cl<sub>2</sub>) solutions. The concentrations of PT derivatives  
 334 in dichloromethane solutions were prepared in such a manner that their maximum absorbance at  $\lambda = 372$  nm was ca.  
 335 0.05 to 0.1. The emission spectrum of the solutions was recorded in the right-angle mode (387-800 nm). Coumarin152  
 336 in cyclohexane ( $\Phi_f = 0.97$ ) was taken as the reference for the QY calculation. Both the PT- derivatives and the  
 337 Coumarin152 were excited at 372 nm, keeping both the excitation and emission slit widths at 1nm. Three independent  
 338 determinations were recorded, and the average of the corresponding QY values was reported. The QY for the as-  
 339 synthesized compounds were calculated using the following formula:

$$340 \Phi_f = \Phi_s \times (A_s/A_f) \times (I_f/I_s) \times (\eta_f/\eta_s)^2 \dots\dots\dots (1)$$

341 where the subscripts "s" and "f" refer to standard and PT derivatives, A<sub>s</sub> and A<sub>f</sub> refer to the  
 342 absorbances of the standard and test compounds under considerations at the excitation wavelength 372 nm, I<sub>f</sub> and  
 343 I<sub>s</sub> refer to the integrated emission intensities (i.e., areas under the emission curves) of the test sample and the  
 344 standard, and  $\eta_f$  and  $\eta_s$  to the refractive indexes of the corresponding solutions (pure solvents are assumed).

345  
346  
347  
348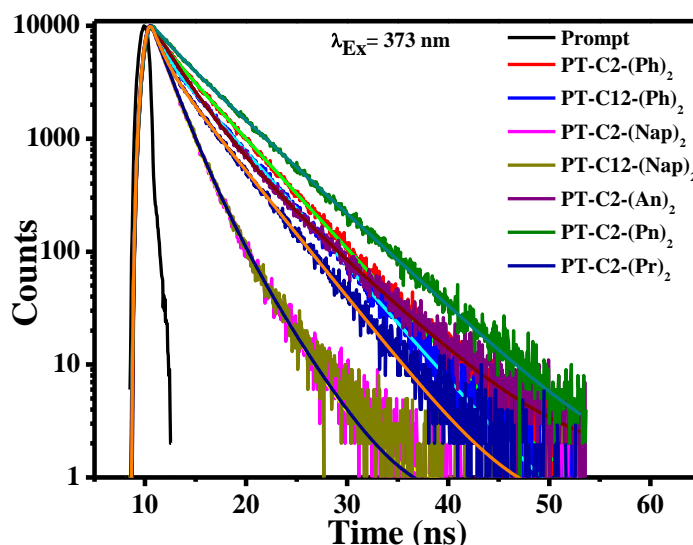

349

350 **Figure S38.** Time resolved fluorescence decay of (a) PT-C2-(Ph)<sub>2</sub>, (b) PT-C12-(Ph)<sub>2</sub>, (c) PT-C2-(Nap)<sub>2</sub>, (d) PT-C12-(Nap)<sub>2</sub>, (e) PT-C2-(An)<sub>2</sub>, (f) PT-C2-(Pn)<sub>2</sub> and (g) PT-  
 351 C2-(Pr)<sub>2</sub> (luminogen conc. ca.10  $\mu$ M) in DCM ( $\lambda_{Ex}$ = 373 nm).

**Table S2.** Time-resolved fluorescence decay parameters of PT derivatives in DCM ( $\lambda_{\text{ex}} = 370$  nm, luminogen concentration ca.  $10 \mu\text{M}$ ).

| Compounds, Em<br>(nm)              | $\alpha_1$ | $\alpha_2$ | $\tau_1$<br>(ns) | $\tau_2$<br>(ns) | $\tau_f$ (ns) | $\chi^2$ | $\varphi_f$ | $\varphi_{nr}$ | $K_r$ | $K_{nr}$ |
|------------------------------------|------------|------------|------------------|------------------|---------------|----------|-------------|----------------|-------|----------|
| PT-C2-(Ph) <sub>2</sub><br>(527)   | 0.099      | 0.901      | 0.993            | 4.460            | 4.377         | 1.167    | 0.410       | 0.590          | 0.094 | 0.135    |
| PT-C2-(Ph) <sub>2</sub><br>(582)   | 0.087      | 0.914      | 1.990            | 4.640            | 4.537         | 1.155    | 0.410       | 0.590          | 0.090 | 0.130    |
| PT-C12-(Ph) <sub>2</sub><br>(527)  | 0.169      | 0.830      | 0.865            | 4.290            | 4.155         | 1.075    | 0.430       | 0.570          | 0.103 | 0.137    |
| PT-C12-(Ph) <sub>2</sub><br>(582)  | 0.066      | 0.934      | 1.070            | 4.420            | 4.363         | 1.200    | 0.430       | 0.570          | 0.099 | 0.131    |
| PT-C2-(Nap) <sub>2</sub><br>(546)  | 0.719      | 0.281      | 1.530            | 2.960            | 2.145         | 1.120    | 0.150       | 0.850          | 0.070 | 0.396    |
| PT-C2-(Nap) <sub>2</sub><br>(582)  | 0.724      | 0.276      | 1.610            | 2.960            | 2.166         | 0.999    | 0.150       | 0.850          | 0.069 | 0.392    |
| PT-C12-(Nap) <sub>2</sub><br>(544) | 0.803      | 0.197      | 1.680            | 3.220            | 2.172         | 1.020    | 0.140       | 0.860          | 0.064 | 0.396    |
| PT-C12-(Nap) <sub>2</sub><br>(587) | 0.717      | 0.283      | 1.660            | 2.840            | 2.135         | 1.190    | 0.140       | 0.860          | 0.066 | 0.403    |
| PT-C2-(An) <sub>2</sub><br>(548)   | 0.589      | 0.411      | 2.560            | 5.420            | 4.264         | 1.180    | 0.070       | 0.930          | 0.016 | 0.218    |
| PT-C2-(An) <sub>2</sub><br>(600)   | 0.530      | 0.470      | 2.560            | 4.790            | 3.952         | 0.991    | 0.070       | 0.930          | 0.018 | 0.235    |
| PT-C2-(Pn) <sub>2</sub><br>(533)   | 0.098      | 0.902      | 2.080            | 5.280            | 5.149         | 1.230    | 0.440       | 0.560          | 0.085 | 0.109    |
| PT-C2-(Pn) <sub>2</sub><br>(580)   | 0.199      | 0.801      | 3.240            | 5.710            | 5.405         | 1.128    | 0.440       | 0.560          | 0.081 | 0.104    |
| PT-C2-(Pr) <sub>2</sub><br>(548)   | 0.249      | 0.751      | 1.010            | 3.880            | 3.652         | 1.023    | 0.170       | 0.830          | 0.047 | 0.227    |
| PT-C2-(Pr) <sub>2</sub><br>(594)   | 0.144      | 0.856      | 1.650            | 3.960            | 3.808         | 1.075    | 0.170       | 0.830          | 0.045 | 0.218    |

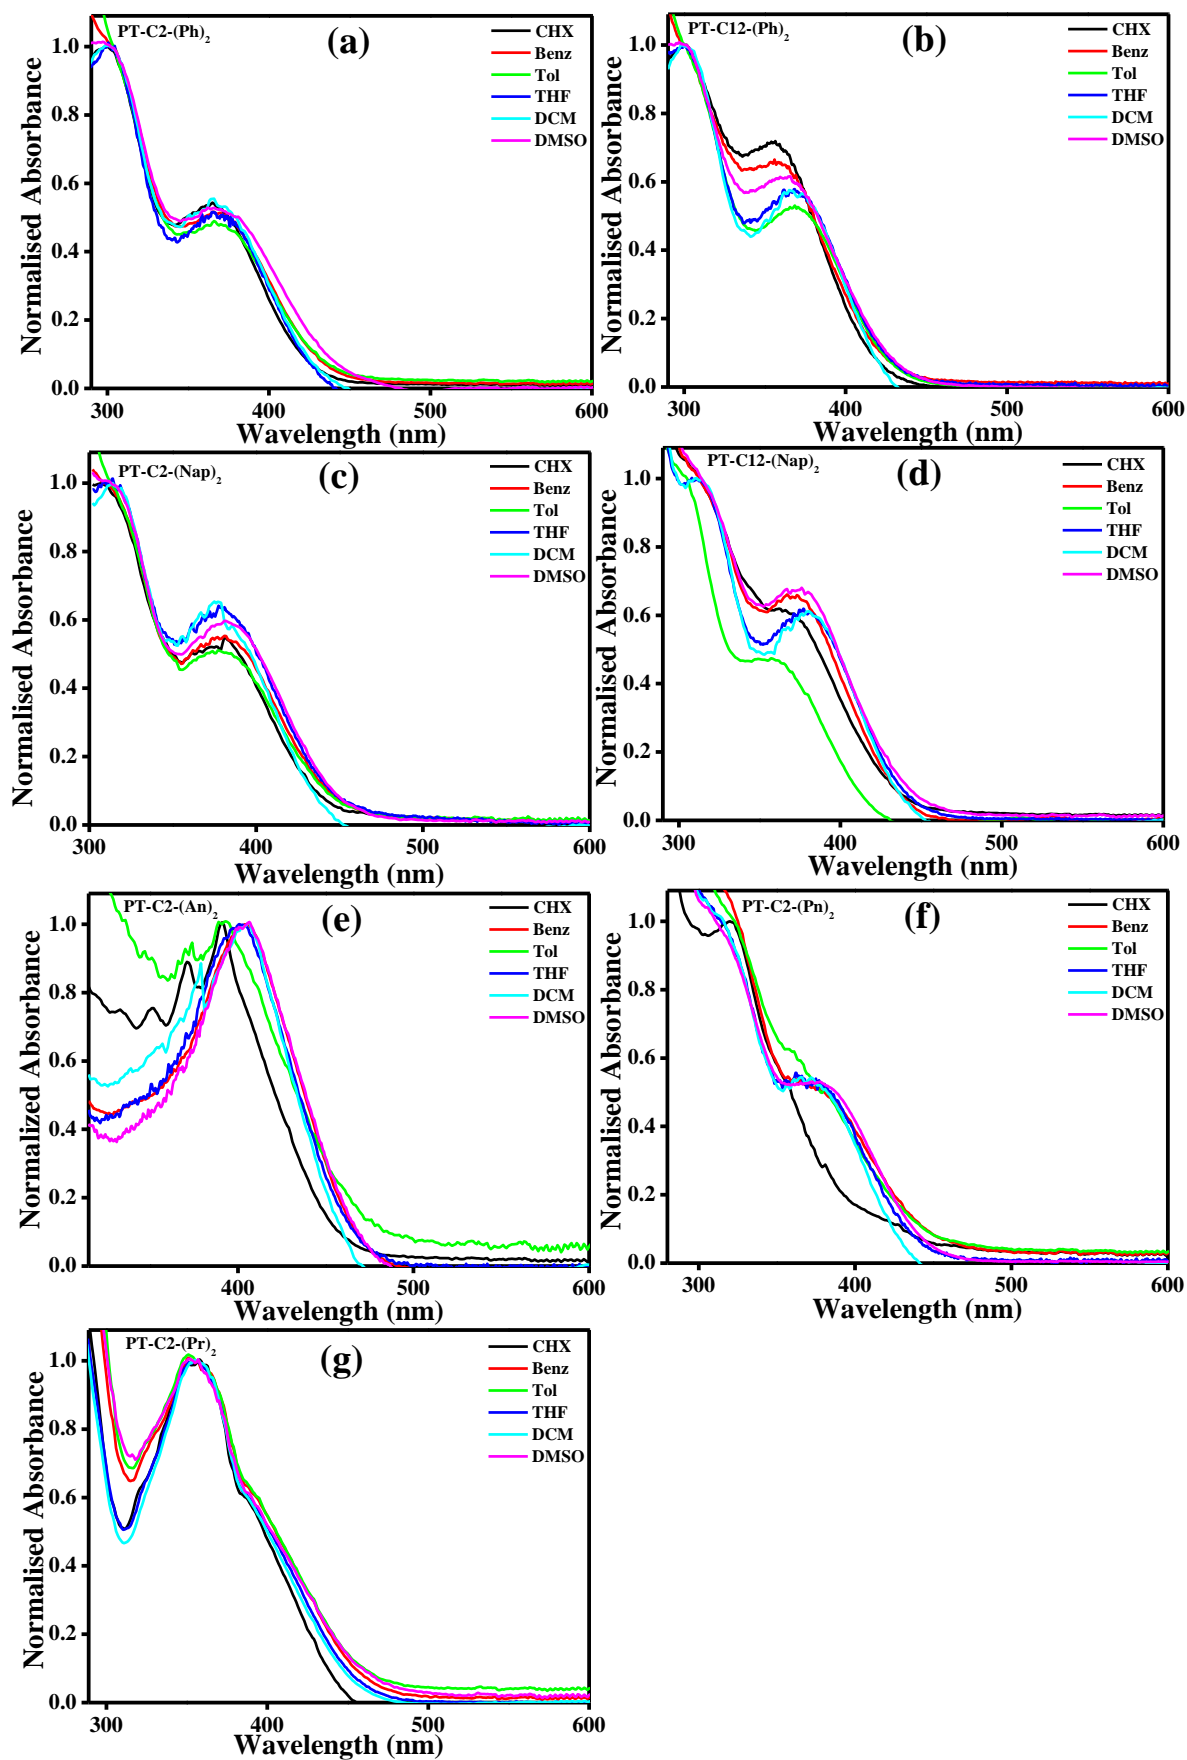

354

355  
356

Figure S39. Absorption spectra of (a) PT-C2-(Ph)<sub>2</sub>, (b) PT-C12-(Ph)<sub>2</sub>, (c) PT-C2-(Nap)<sub>2</sub>, (d) PT-C12-(Nap)<sub>2</sub>, (e) PT-C2-(An)<sub>2</sub> and (f) PT-C2-(Pn)<sub>2</sub> and (g) PT-C2-(Pr)<sub>2</sub> in solvents (Cyclohexane (CHX), Benzene (Benz), Toluene (Tol), DCM, THF, and DMSO) of varying polarity.

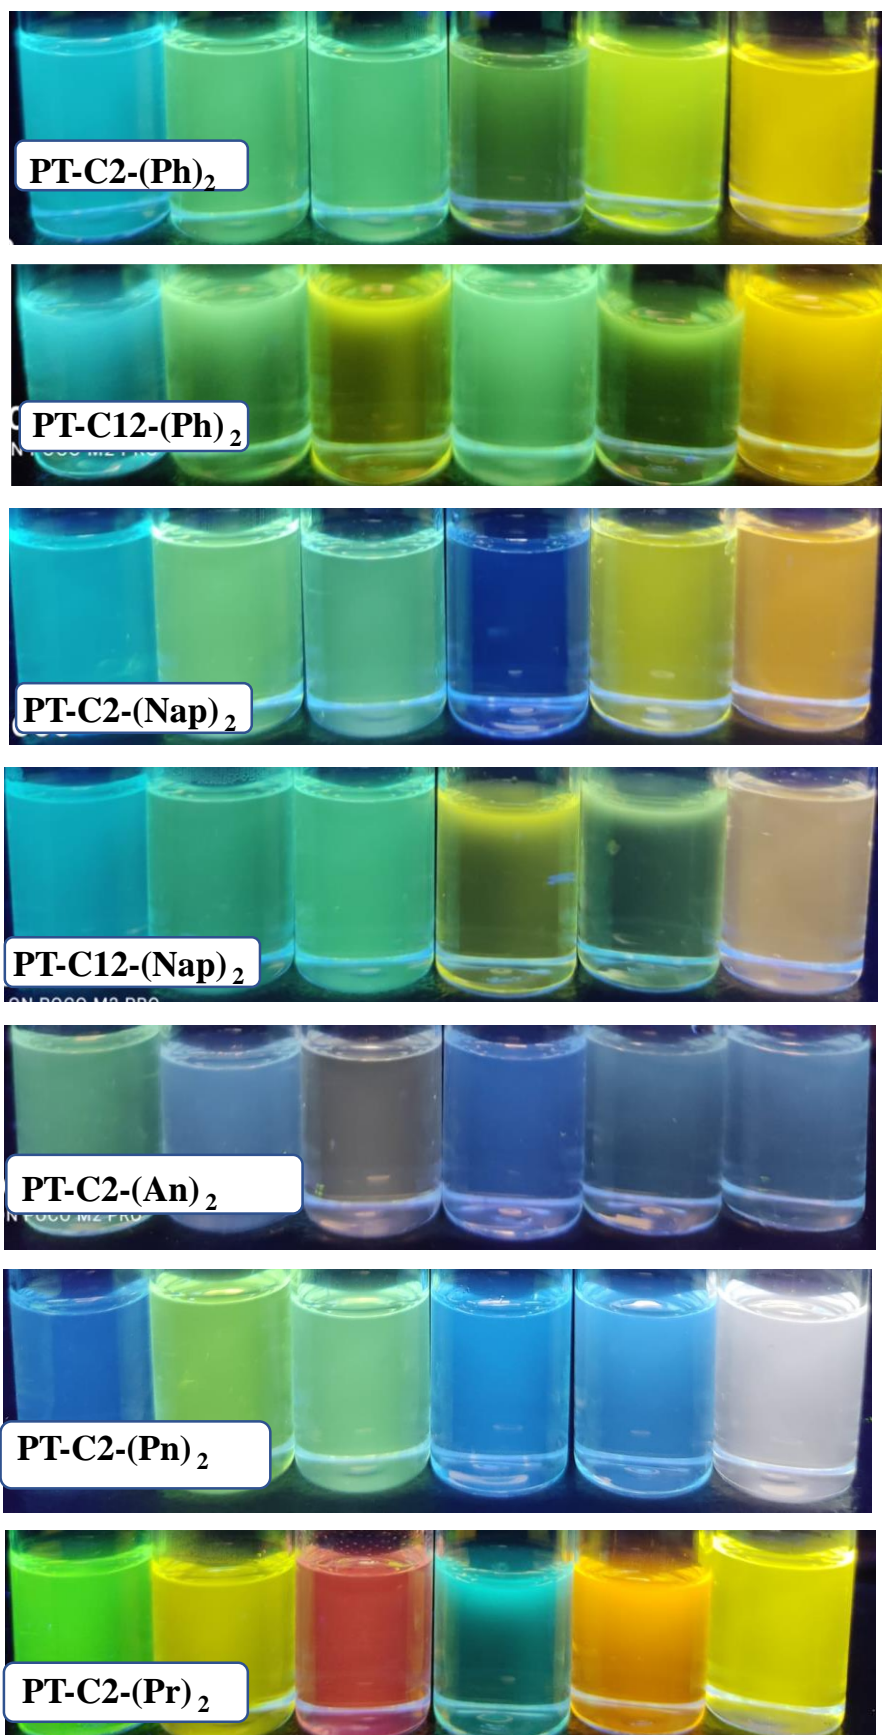

357

358 **Figure S40.** Photographs of PT-C2-(Ph)<sub>2</sub>, PT-C12-(Ph)<sub>2</sub>, PT-C2-(Nap)<sub>2</sub>, PT-C12-(Nap)<sub>2</sub>, PT-C2-(An)<sub>2</sub>, PT-C2-(Pn)<sub>2</sub> and PT-C2-(Pr)<sub>2</sub> (top to bottom) (luminogen  
 359 conc. ca.10 μM) in different solvents with increasing polarity taken under 365 nm UV illumination (Cyclohexane (CHX), Benzene (Benz), Toluene (Tol), DCM,  
 360 THF and DMSO).

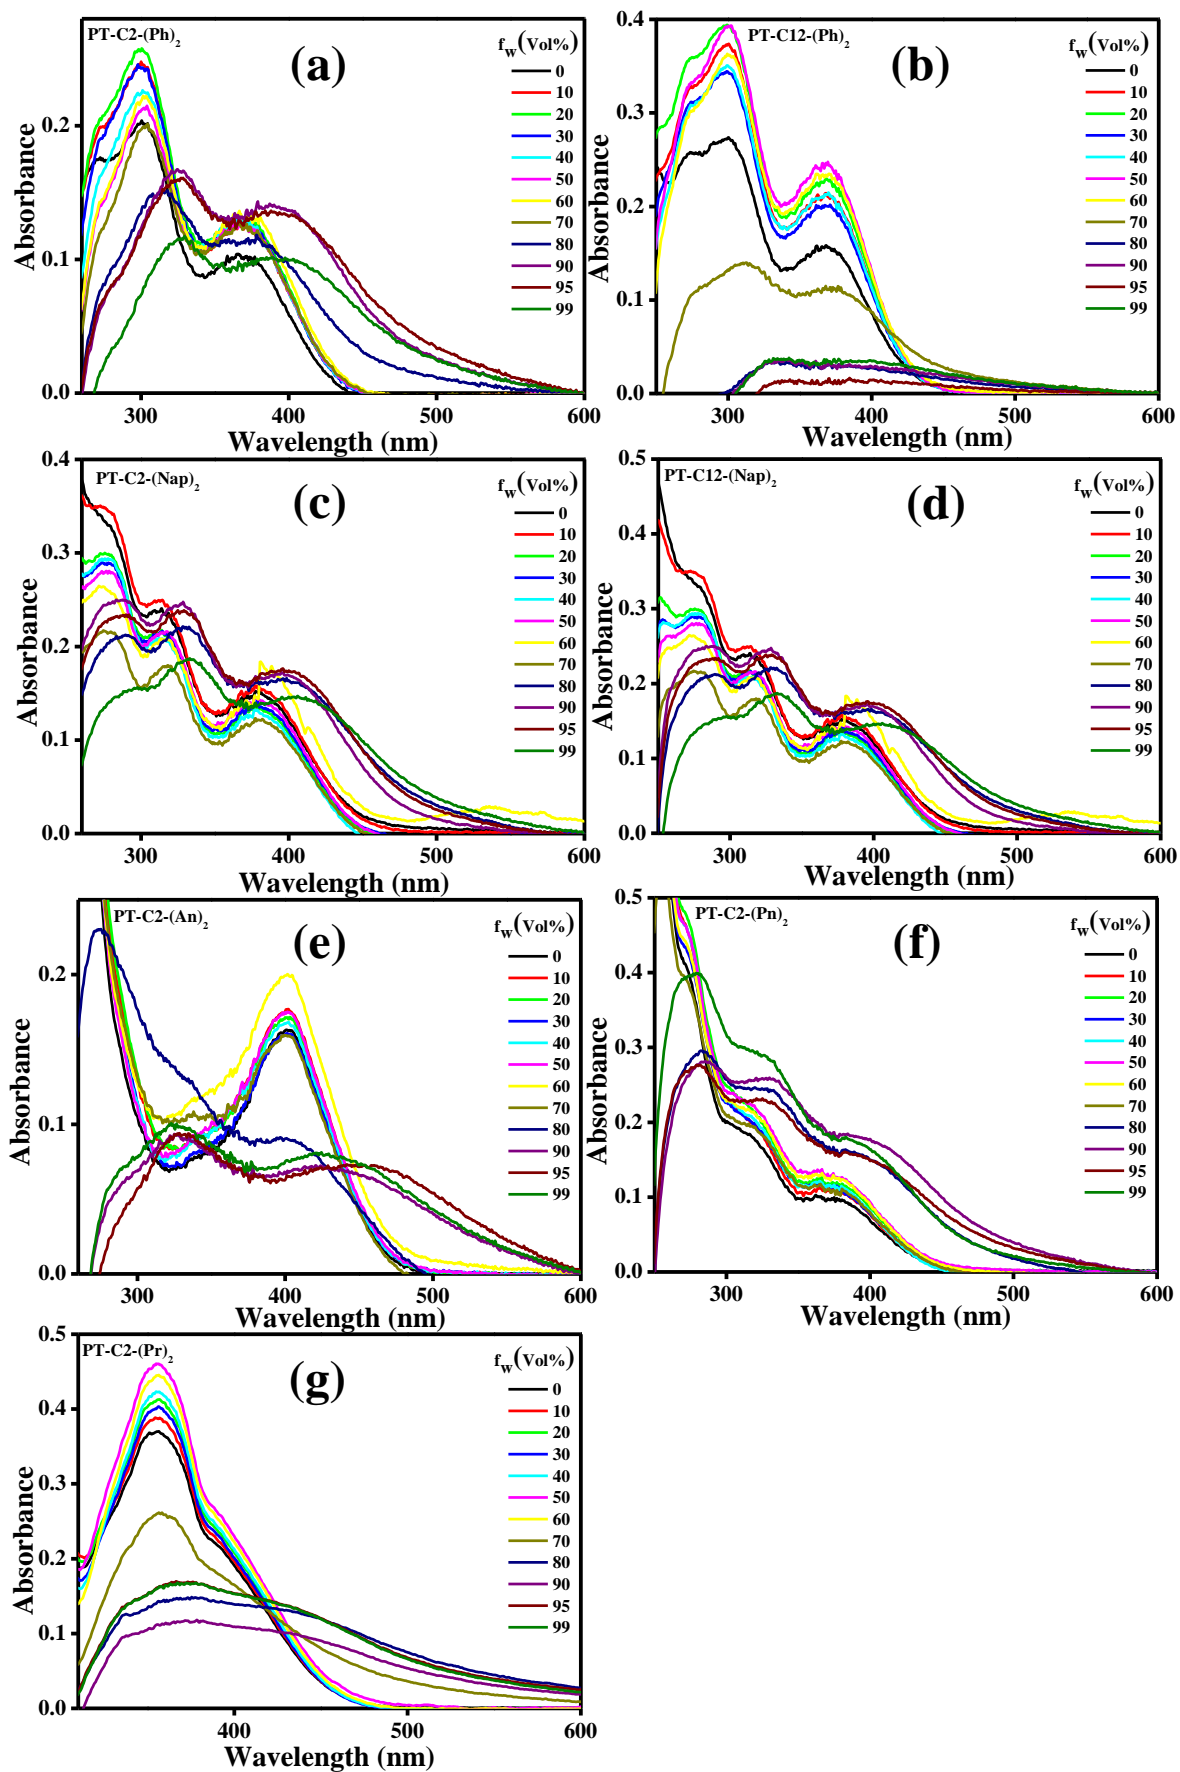

361

362  
363

Figure S41. Absorption spectra of (a) PT-C2-(Ph)<sub>2</sub>, (b) PT-C12-(Ph)<sub>2</sub>, (c) PT-C2-(Nap)<sub>2</sub>, (d) PT-C12-(Nap)<sub>2</sub>, (e) PT-C2-(An)<sub>2</sub>, (f) PT-C2-(Pn)<sub>2</sub> and (g) PT-C2-(Pr)<sub>2</sub> in THF–water mixtures with different water fractions ( $f_w$  (%)) (luminogen conc. 10  $\mu\text{M}$ ).



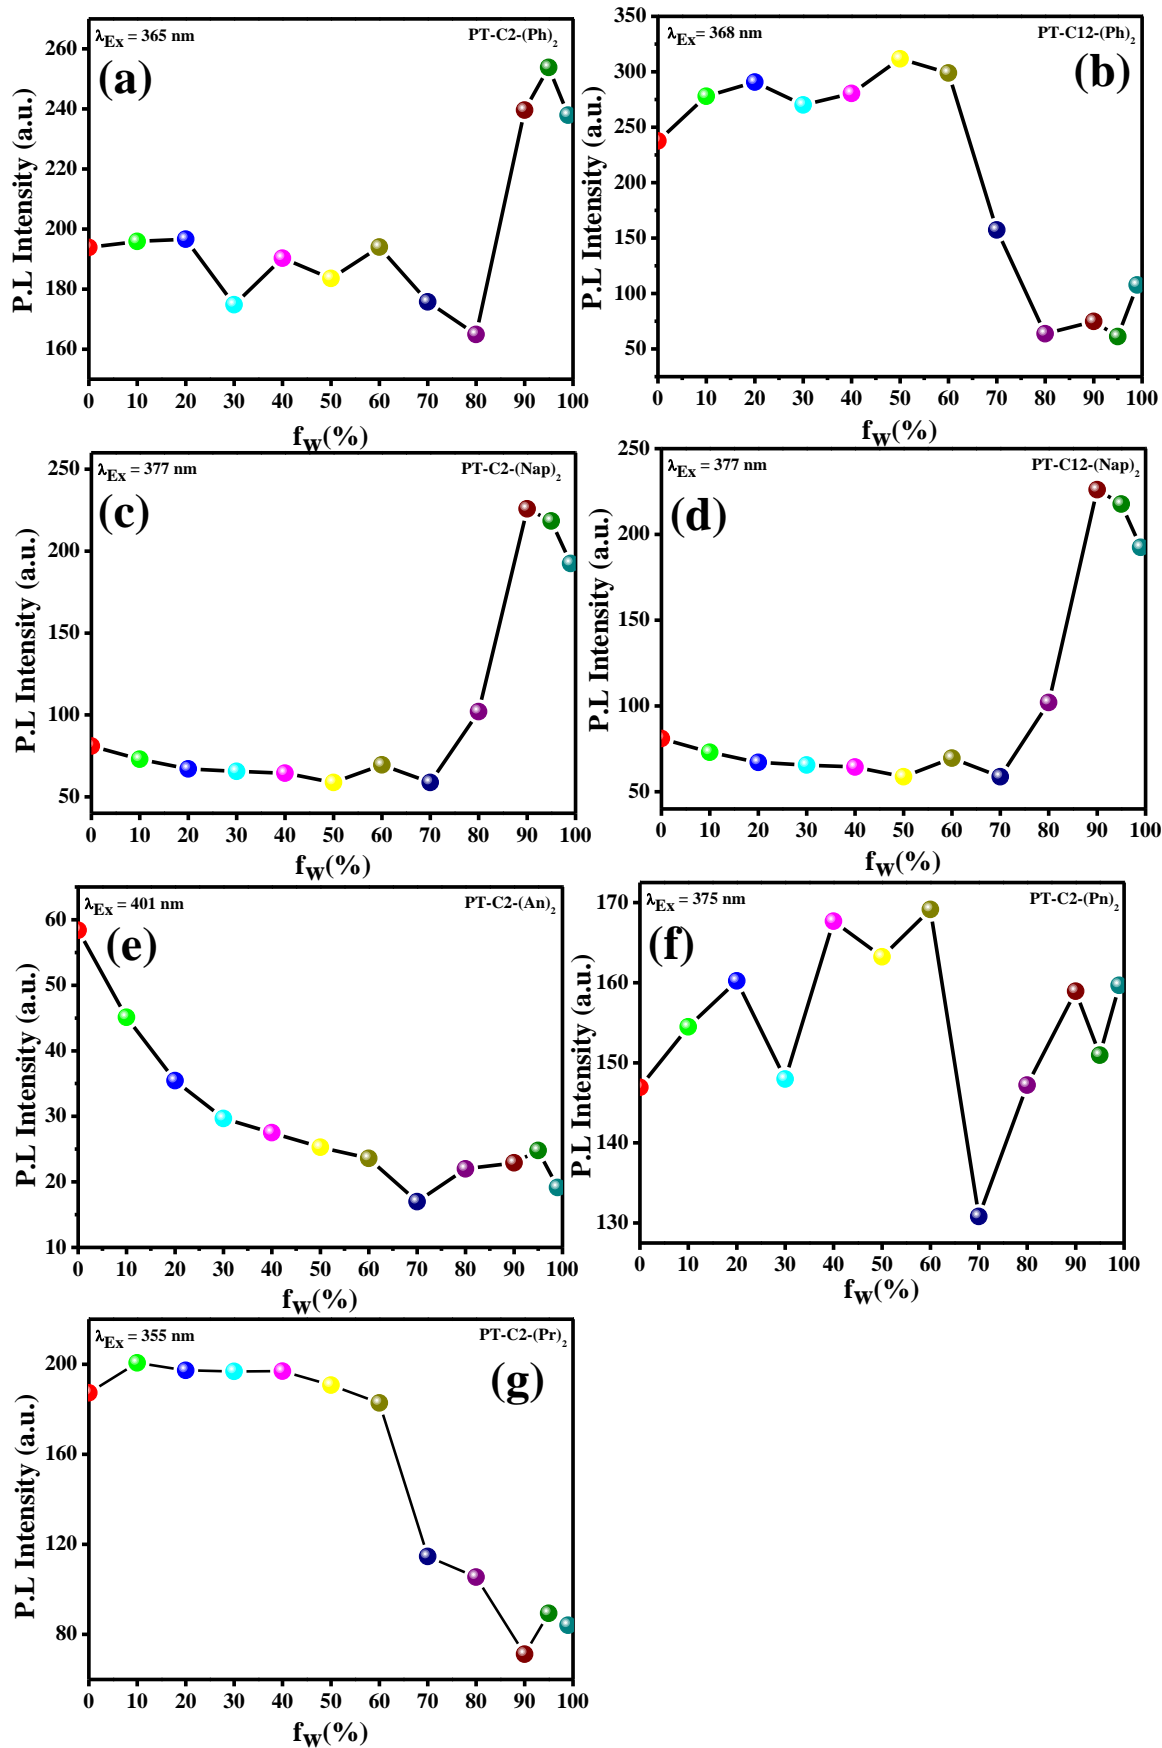

364

365

366

367

**Figure S42.** P.L. intensity ( $I_{max}$ ) vs. water fraction ( $f_W$ ) % [intensity calculated at  $I_{max}$  ( $I_{max}$  with the highest intensity considered for the calculation)] of (a) PT-C2-(Ph)<sub>2</sub>, (b) PT-C12-(Ph)<sub>2</sub>, (c) PT-C2-(Nap)<sub>2</sub>, (d) PT-C12-(Nap)<sub>2</sub>, (e) PT-C2-(An)<sub>2</sub>, (f) PT-C2-(Pn)<sub>2</sub> and (g) PT-C2-(Pr)<sub>2</sub> in THF-water mixtures with different water fractions ( $f_W$  (%)) (luminogen conc. 10  $\mu$ M).

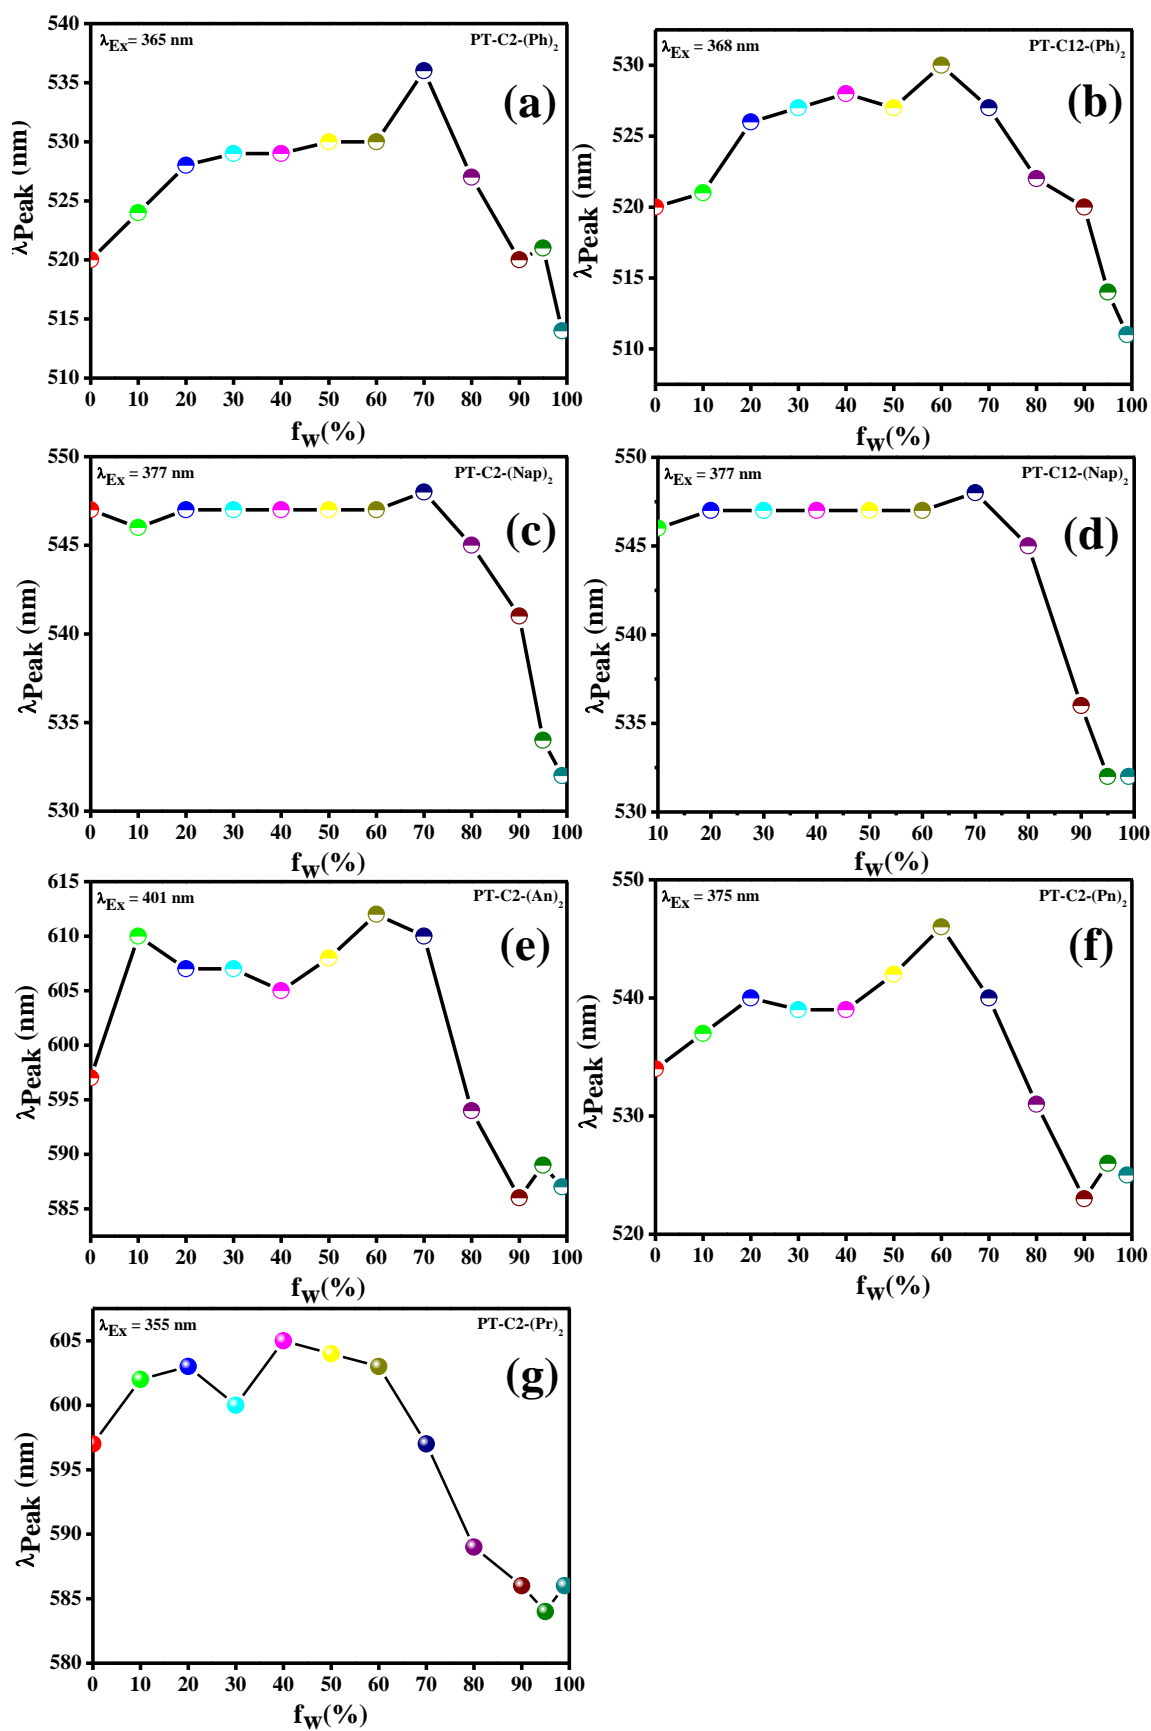

368

369

370

371

**Figure S43.** Emission wavelength ( $\lambda_{\text{Peak}}$ ) vs. water fraction ( $f_{\text{W}}$ ) % [intensity calculated at  $\lambda_{\text{max}}$  ( $\lambda_{\text{max}}$  with the highest intensity considered for the calculation)] of (a) PT-C2-(Ph)<sub>2</sub>, (b) PT-C12-(Ph)<sub>2</sub>, (c) PT-C2-(Nap)<sub>2</sub>, (d) PT-C12-(Nap)<sub>2</sub>, (e) PT-C2-(An)<sub>2</sub> and (f) PT-C2-(Pn)<sub>2</sub> and (g) PT-C2-(Pr)<sub>2</sub> in THF–water mixtures with different water fractions ( $f_{\text{W}}$  (%)) (luminogen conc. 10  $\mu\text{M}$ ).

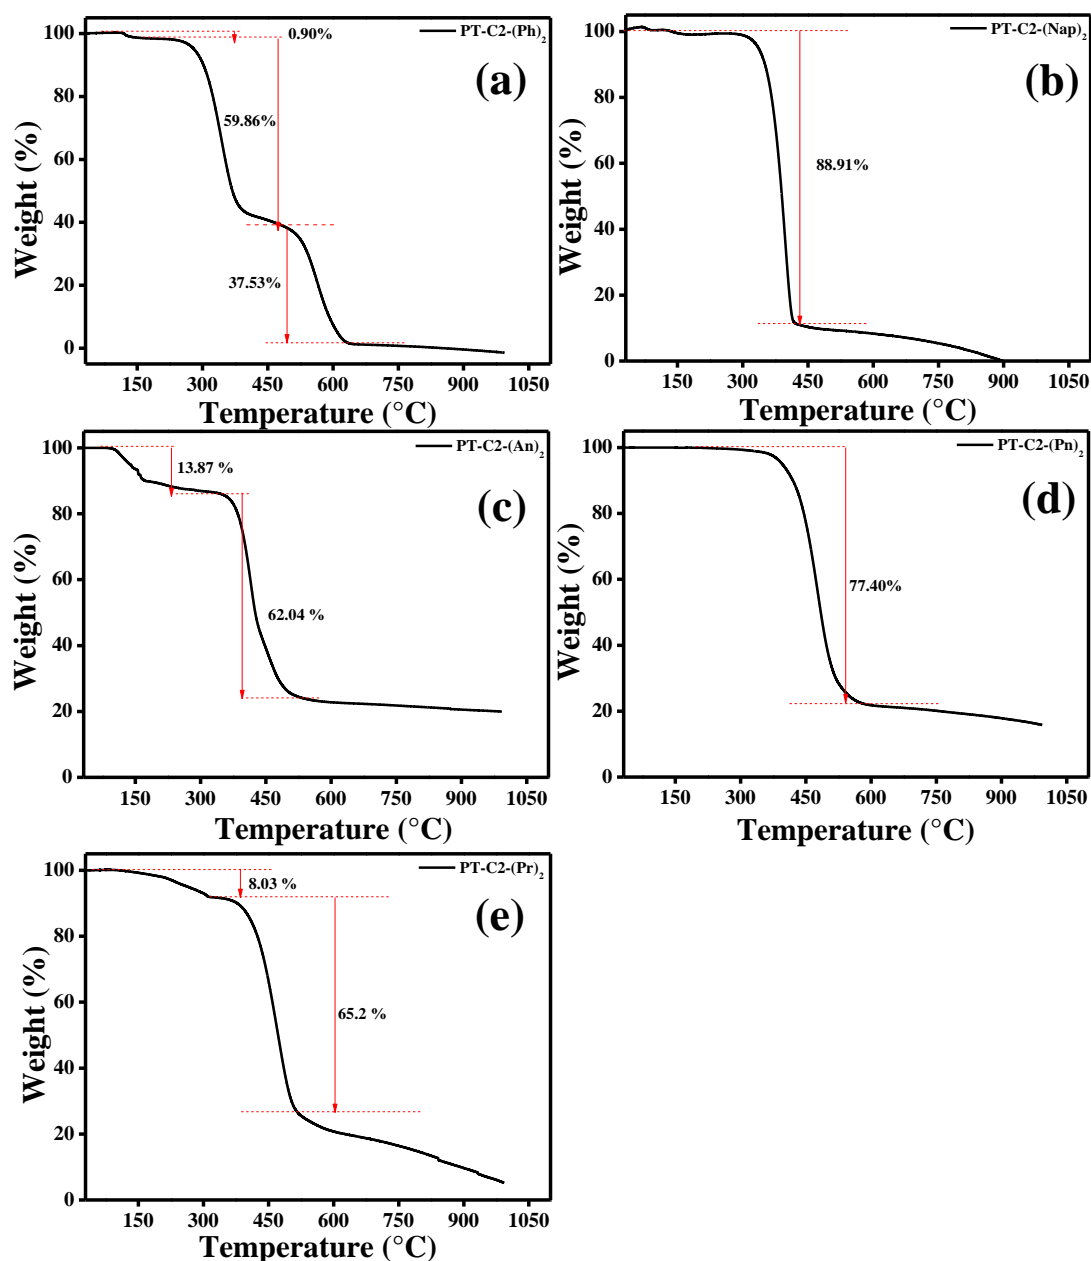

372

373 **Figure S44.** Thermal gravimetric analysis of the five PT-derivatives, and the  $T_d$  of (a) PT-C2-(Ph)<sub>2</sub>, (b) PT-C2-(Nap)<sub>2</sub>, (c)PT-C2-(An)<sub>2</sub>, (d) PT-C2-(Pn)<sub>2</sub> and (e) PT-C2-  
374 (Pr)<sub>2</sub>.

375 **Extraction of HOMO values from the CV data**

376 From the cyclic voltammograms given below, the HOMO values have been calculated by considering the onset  
377 oxidation potential of the ethynyldiaryl- & dodecyldiaryl-phenothiazine derivatives and the compounds with the  
378 ferrocene (FC) using the following equation (2). The tabulated values are documented in **Table S3**. The formula for  
379 the HOMO value calculation from the CV data using the Fc/Fc<sup>+</sup> as the internal standard is:

380 
$$E_{\text{HOMO}} \text{ (eV)} = -(E_{\text{OX}}^{\text{onset}} - E_{\text{Fc/Fc}^+}^{\text{onset}}) - 4.80 \text{ eV} \quad \dots\dots\dots (2)$$

381 The energy values were calculated by using ferrocene as the internal standard with the HOMO value -4.8 eV against  
382 vacuum level as zero. Here,  $E_{\text{OX}}^{\text{onset}}$  and  $E_{\text{Fc/Fc}^+}^{\text{onset}}$  are the onset oxidation potentials of the ethynyldiaryl- &  
383 dodecyldiaryl-phenothiazine derivatives and of the ferrocene against Ag/AgCl electrode. The obtained ferrocene  
384 onset value was found to be in good agreement with the literature value.

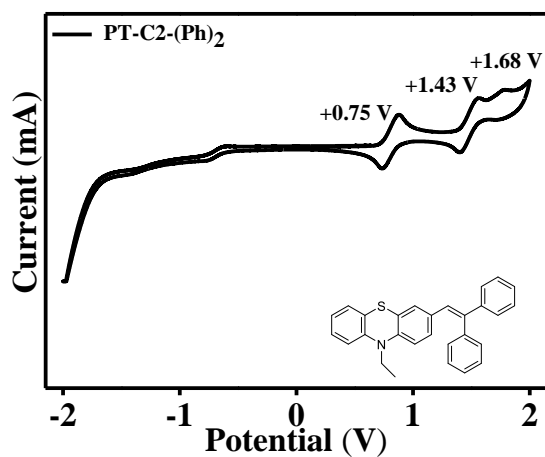

385

386 Figure S45. Cyclic voltammograms of PT-C2-(Ph)<sub>2</sub> in DCM.

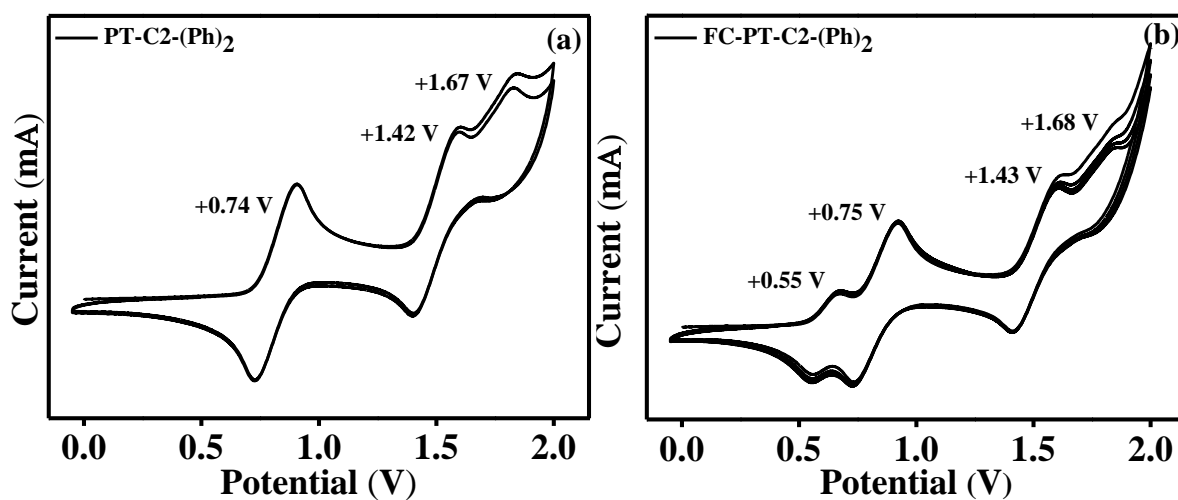

387

388 Figure S46. Cyclic voltammograms (100 mV/sec) of PT-C2-(Ph)<sub>2</sub> without Fc/Fc<sup>+</sup> (a) and with Fc/Fc<sup>+</sup> (b) in DCM.

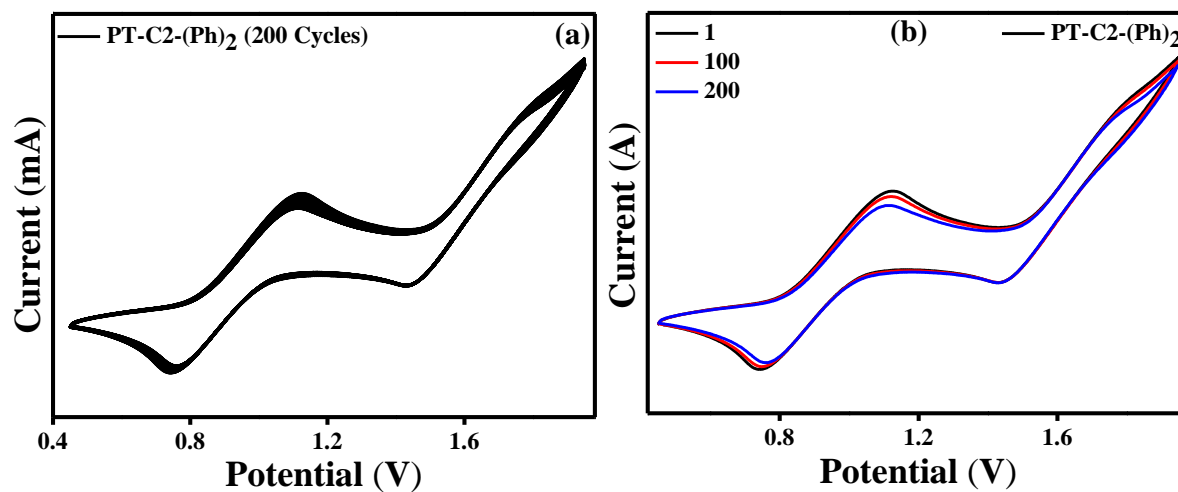

389

390 Figure S47. Cyclic voltammograms (200 mV/sec) of PT-C2-(Ph)<sub>2</sub> (200 cycles) (a) and (1st, 100th and 200th cycles) (b) in DCM.

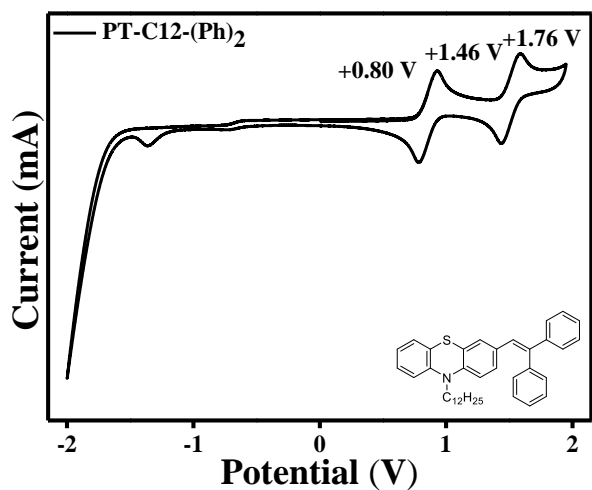

391

392 Figure S48. Cyclic voltammograms of PT-C12-(Ph)<sub>2</sub> in DCM.

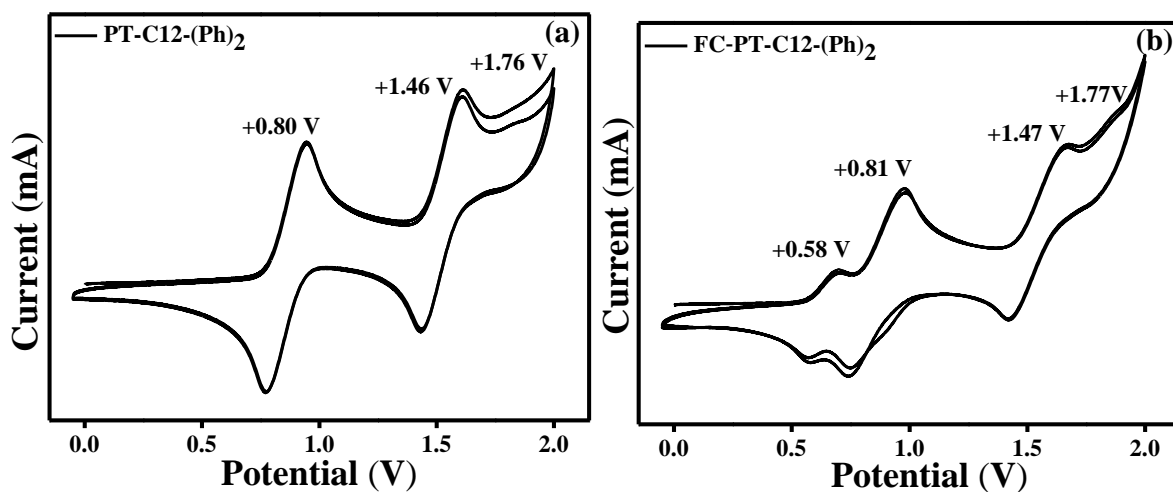

393

394 Figure S49. Cyclic voltammograms (100 mV/sec) of PT-C12-(Ph)<sub>2</sub> without Fc/Fc<sup>+</sup> (a) and with Fc/Fc<sup>+</sup> (b) in DCM.

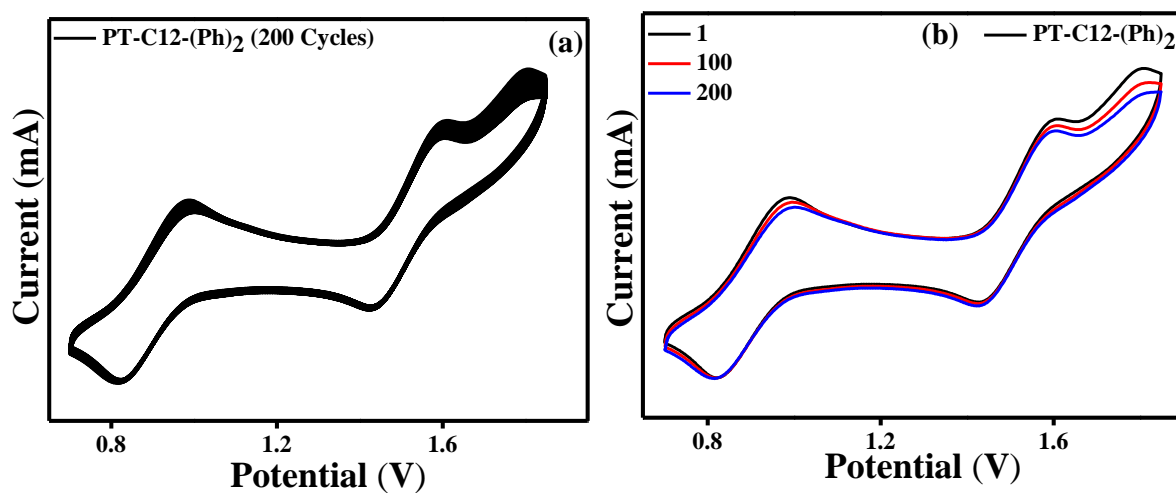

395

396

397 Figure S50. Cyclic voltammograms (200 mV/sec) of PT-C12-(Ph)<sub>2</sub> (200 cycles) (a) and (1st, 100th and 200th cycles) (b) in DCM.

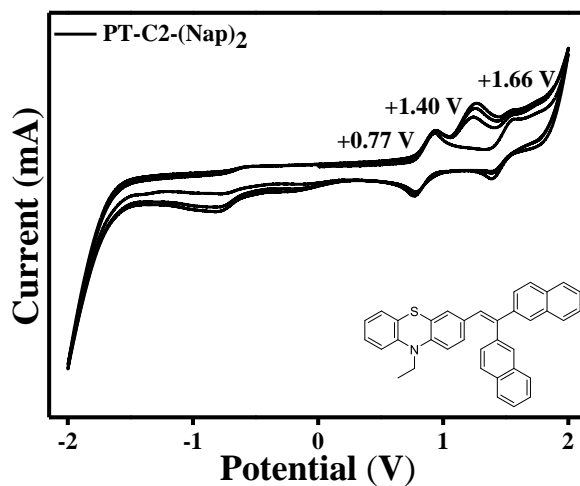

398

399

Figure S51. Cyclic voltammograms of PT-C2-(Nap)<sub>2</sub> in DCM.

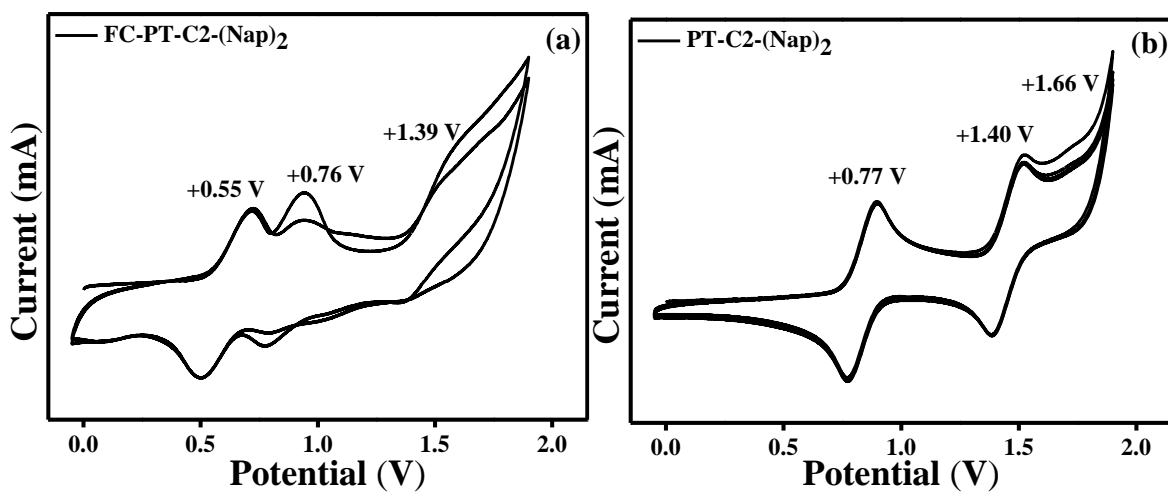

400

401

Figure S52. Cyclic voltammograms (100 mV/sec) of PT-C2-(Nap)<sub>2</sub> without Fc/Fc<sup>+</sup> (a) and with Fc/Fc<sup>+</sup> (b) in DCM.

402

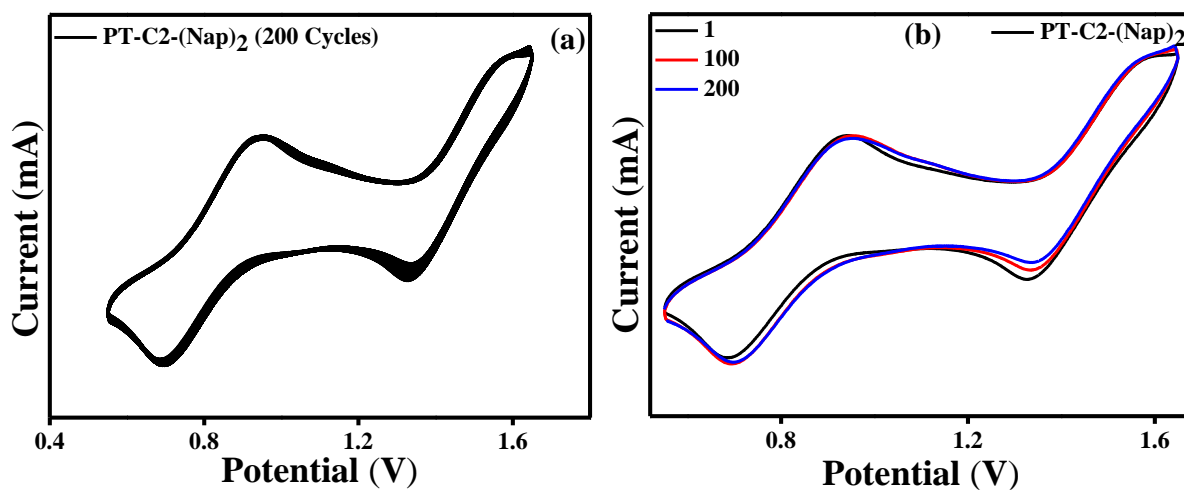

403

404

Figure S53. Cyclic voltammograms (200 mV/sec) of PT-C2-(Nap)<sub>2</sub> (200 cycles) (a) and (1st, 100th and 200th cycles) (b) in DCM.

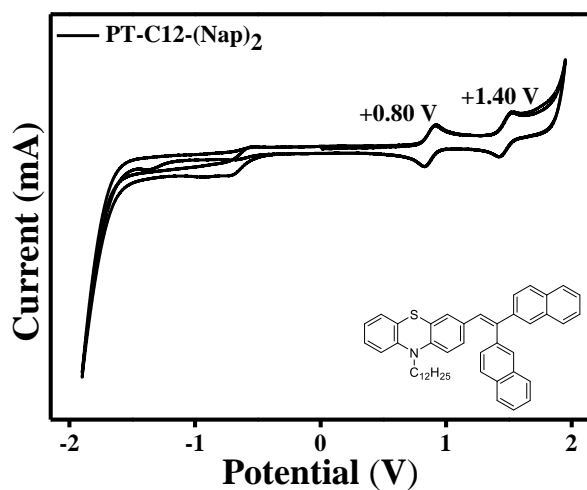

405

406 Figure S54. Cyclic voltammograms of PT-C12-(Nap)<sub>2</sub> in DCM.

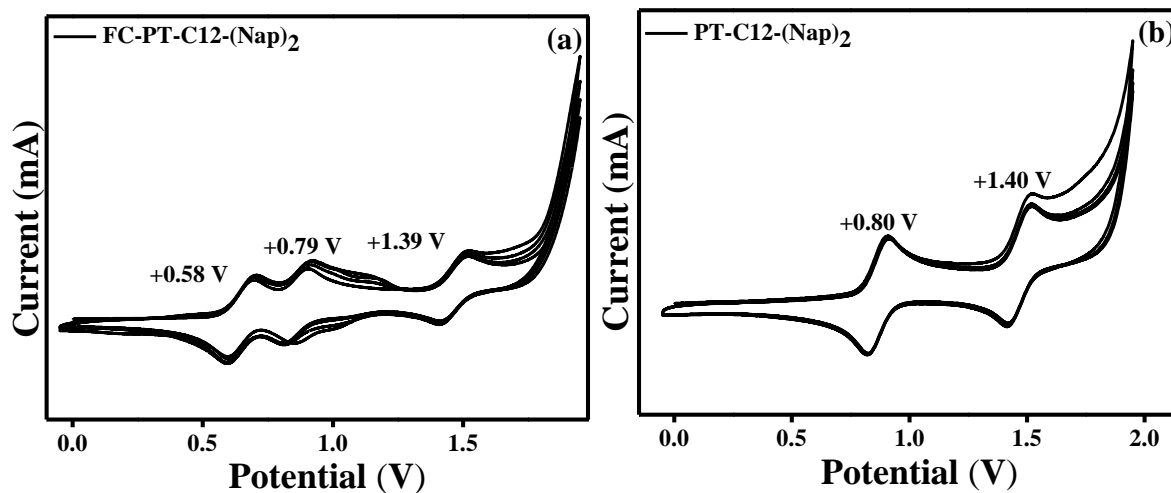

407

408 Figure S55. Cyclic voltammograms (100 mV/sec) of PT-C12-(Nap)<sub>2</sub> without Fc/Fc<sup>+</sup> (a) and with Fc/Fc<sup>+</sup> (b) in DCM.

409

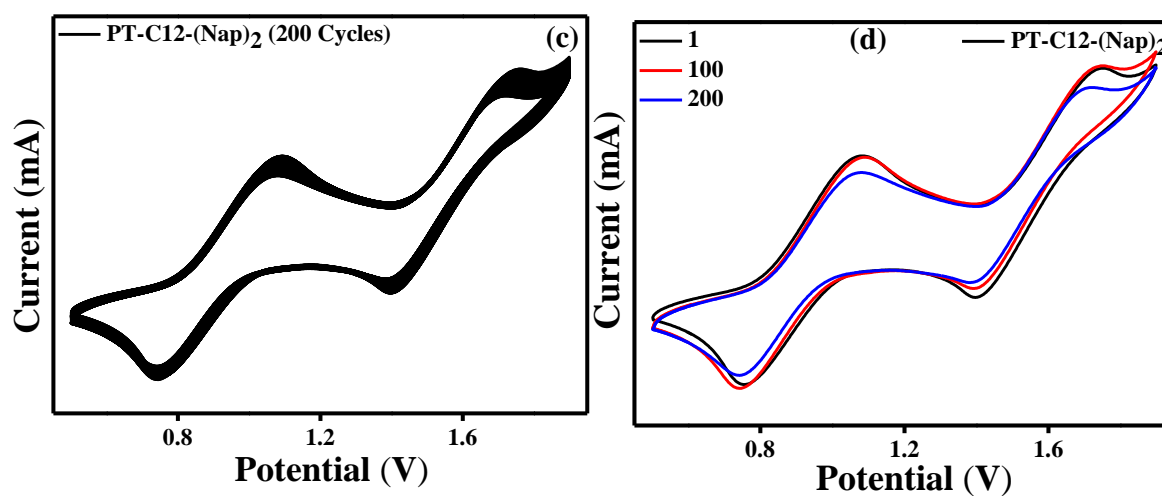

410

411 Figure S56. Cyclic voltammograms (200 mV/sec) of PT-C12-(Nap)<sub>2</sub> (200 cycles) (a) and (1st, 100th and 200th cycles) (b) in DCM.

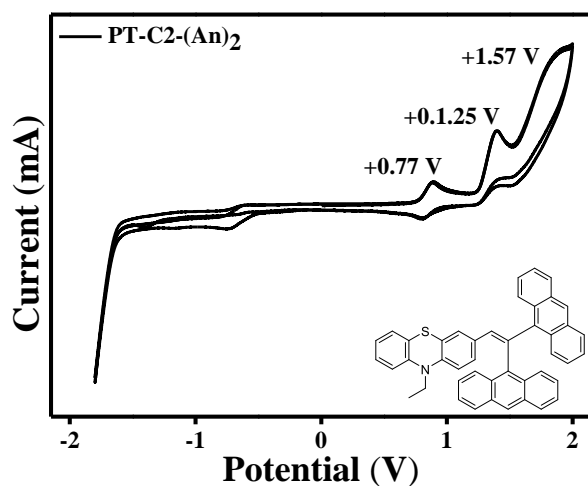

412

413 Figure S57. Cyclic voltammograms of PT-C2-(An)<sub>2</sub> in DCM.

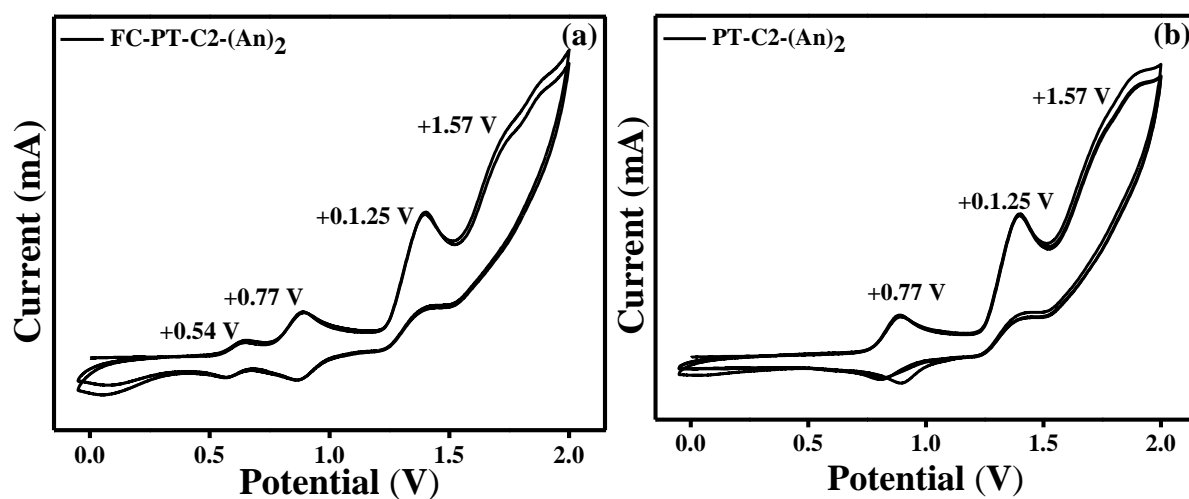

414

415 Figure S58. Cyclic voltammograms (100 mV/sec) of PT-C2-(An)<sub>2</sub> without Fc/Fc<sup>+</sup> (a) and with Fc/Fc<sup>+</sup> (b) in DCM.

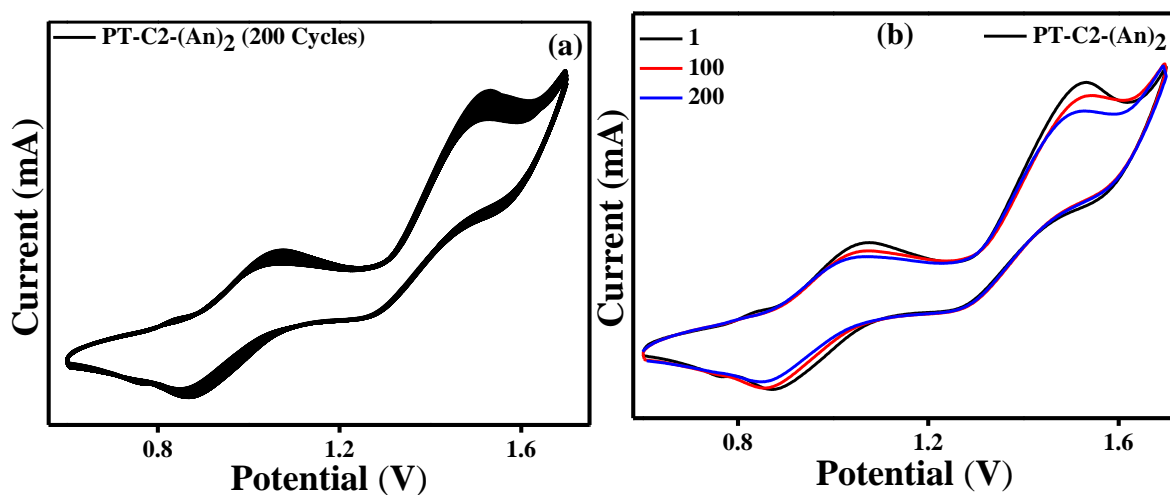

416

417 Figure S59. Cyclic voltammograms (200 mV/sec) of PT-C2-(An)<sub>2</sub> (200 cycles) (a) and (1st, 100th and 200th cycles) (b) in DCM.

418



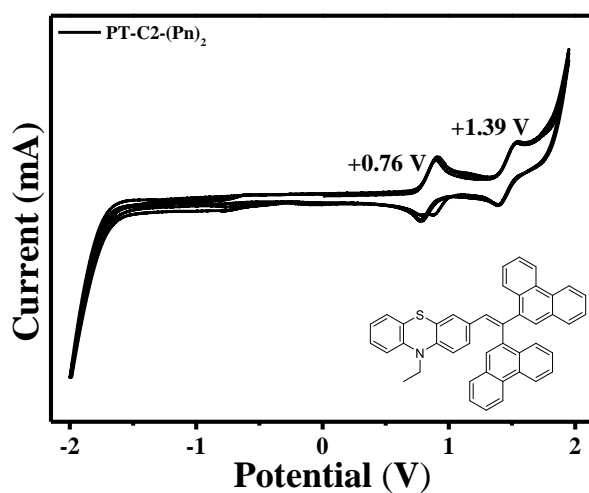

419

420 Figure S60. Cyclic voltammograms of PT-C2-(Pn)<sub>2</sub> in DCM.

421

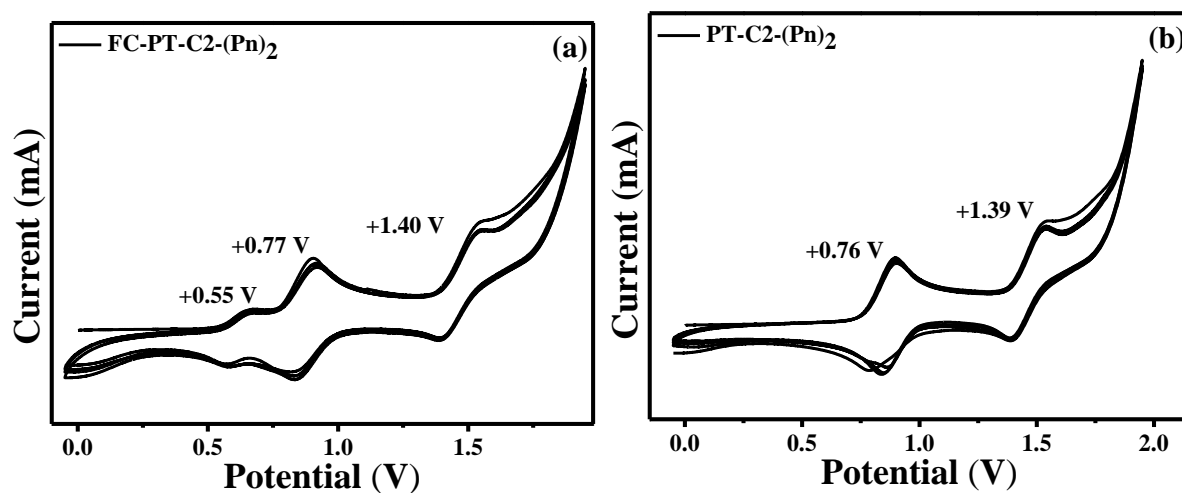

422

423 Figure S61. Cyclic voltammograms (100 mV/sec) of PT-C2-(Pn)<sub>2</sub> without Fc/Fc<sup>+</sup> (a) and with Fc/Fc<sup>+</sup> (b) in DCM.

424

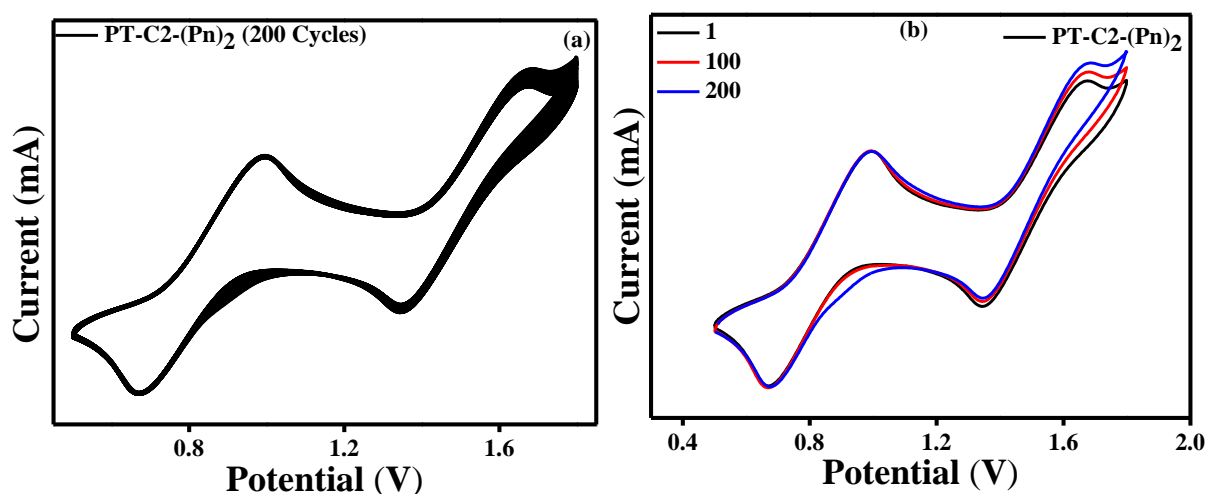

425

426 Figure S62. Cyclic voltammograms (200 mV/sec) of PT-C2-(Pn)<sub>2</sub> (200 cycles) (a) and (1st, 100th and 200th cycles) (b) in DCM.

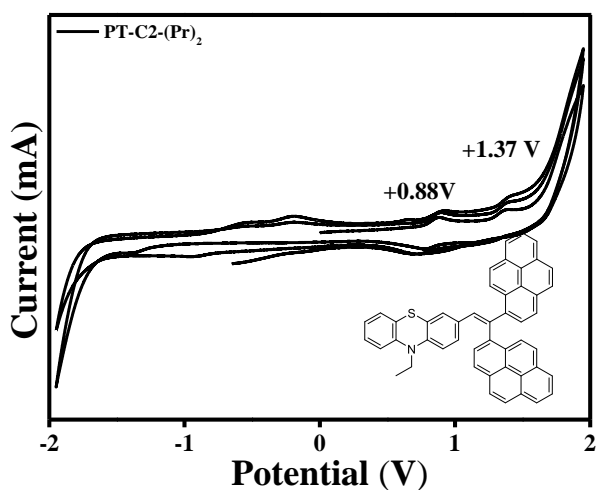

427

428 Figure S63. Cyclic voltammograms of PT-C2-(Pr)<sub>2</sub> in DCM.

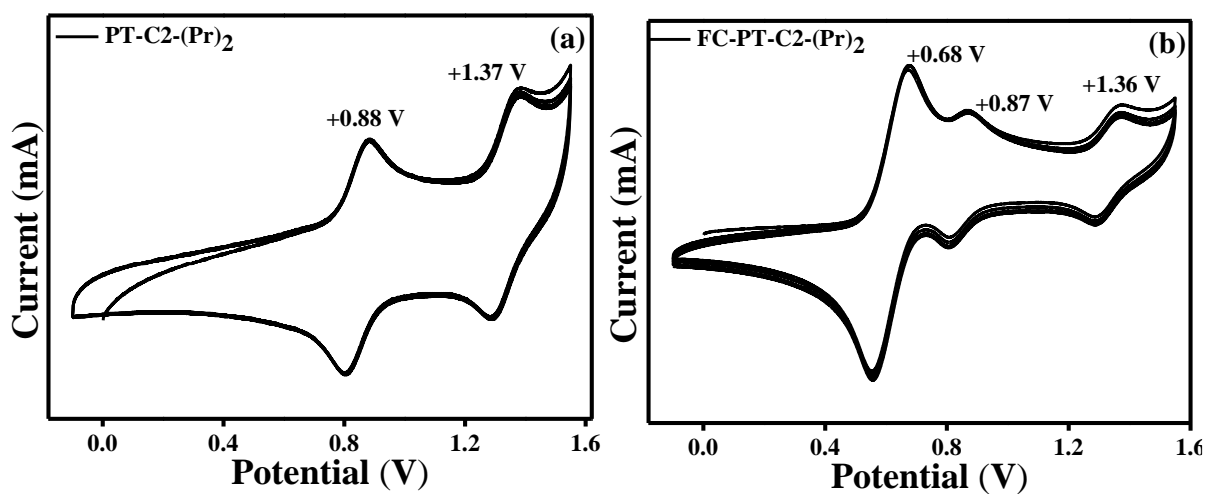

429

430 Figure S64. Cyclic voltammograms (100 mV/sec) of PT-C2-(Pr)<sub>2</sub> without Fc/Fc<sup>+</sup> (a) and with Fc/Fc<sup>+</sup> (b) in DCM.

431

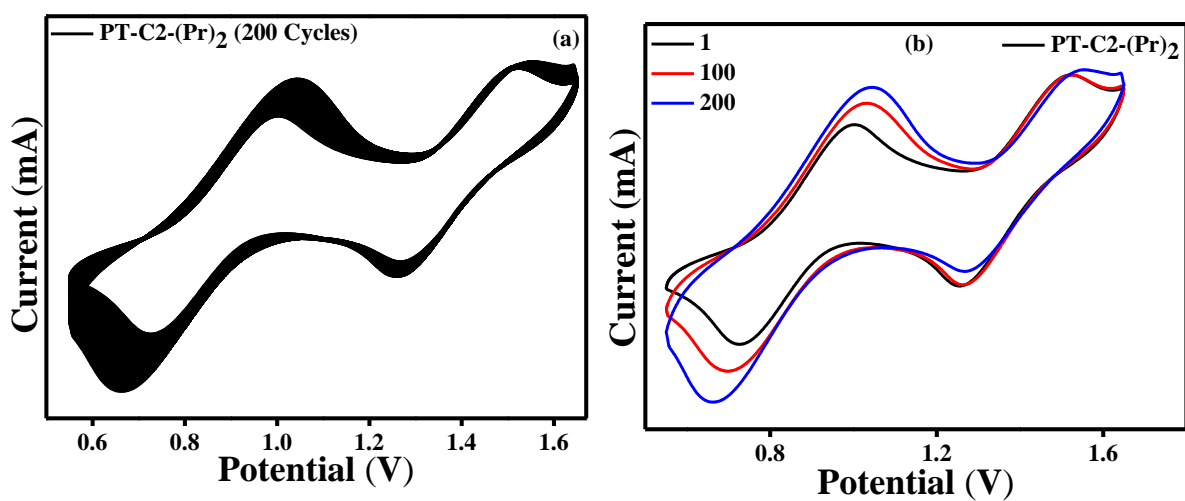

432

433 Figure S65. Cyclic voltammograms (200 mV/sec) of PT-C2-(Pr)<sub>2</sub> (200 cycles) (a) and (1st, 100th and 200th cycles) (b) in DCM.

434 Table S3. Calculated HOMO energy values for the compounds.

| S.No. | Compound                  | Eox (onset, V)       | Fc/Fc+, Eox (onset, V) | EHOMO (eV) |
|-------|---------------------------|----------------------|------------------------|------------|
| 1.    | PT-C2-(Ph) <sub>2</sub>   | +0.75, +1.43, +1.68  | +0.55                  | -5.00      |
| 2.    | PT-C12-(Ph) <sub>2</sub>  | +0.81, +1.47, +1.77  | +0.58                  | -5.03      |
| 3.    | PT-C2-(Nap) <sub>2</sub>  | +0.76, +1.39         | +0.55                  | -5.01      |
| 4.    | PT-C12-(Nap) <sub>2</sub> | +0.79, +1.39         | +0.58                  | -5.01      |
| 5.    | PT-C2-(An) <sub>2</sub>   | +0.77, + 1.25, +1.57 | +0.54                  | -5.03      |
| 6.    | PT-C2-(Pn) <sub>2</sub>   | +0.77, +1.40         | +0.55                  | -5.02      |
| 7.    | PT-C2-(Pr) <sub>2</sub>   | +0.87, +1.36         | +0.68                  | -5.00      |

435

436 **LUMO value calculation from the UV-visible spectra and cyclic voltammogram**

437 The LUMO values<sup>5</sup> were derived by summing up the HOMO values ( $E_{\text{HOMO}}$ , obtained from the first oxidation of  
 438 the cyclic voltammogram, i.e., peak maximum in DPV) with the energy gap ( $E_{\text{g}}$ , obtained from the onset of the UV-  
 439 visible absorption spectrum), which was obtained from the onset of the UV-visible absorption spectrum. The  
 440 equation<sup>5</sup> is as follows, and the values are tabulated in **Table S4**.

441  $E_{\text{LUMO}} = E_{\text{HOMO}} + E_{\text{g}}$  ..... (3)

442 **Table S4.** Calculation of LUMO energy levels of ethynyl-diaryl- & dodecyl-diaryl-phenothiazine derivatives.

| S.No. | Compound                  | $\lambda_{\text{onset}}$ [nm], $E_{\text{g}}$ [eV] | $E_{\text{HOMO}}$ [eV] | $E_{\text{LUMO}}$ [eV] |
|-------|---------------------------|----------------------------------------------------|------------------------|------------------------|
| 1.    | PT-C2-(Ph) <sub>2</sub>   | 381, 2.84                                          | -5.00                  | -2.16                  |
| 2.    | PT-C12-(Ph) <sub>2</sub>  | 370, 2.86                                          | -5.03                  | -2.17                  |
| 3.    | PT-C2-(Nap) <sub>2</sub>  | 381, 2.78                                          | -5.01                  | -2.23                  |
| 4.    | PT-C12-(Nap) <sub>2</sub> | 381, 2.80                                          | -5.01                  | -2.21                  |
| 5.    | PT-C2-(An) <sub>2</sub>   | 405, 2.67                                          | -5.03                  | -2.36                  |
| 6.    | PT-C2-(Pn) <sub>2</sub>   | 365, 2.85                                          | -5.02                  | -2.17                  |
| 7.    | PT-C2-(Pr) <sub>2</sub>   | 460, 2.69                                          | -5.00                  | -2.31                  |

443 Note:  $E_{\text{LUMO}} = E_{\text{HOMO}} + E_{\text{g}}$ .

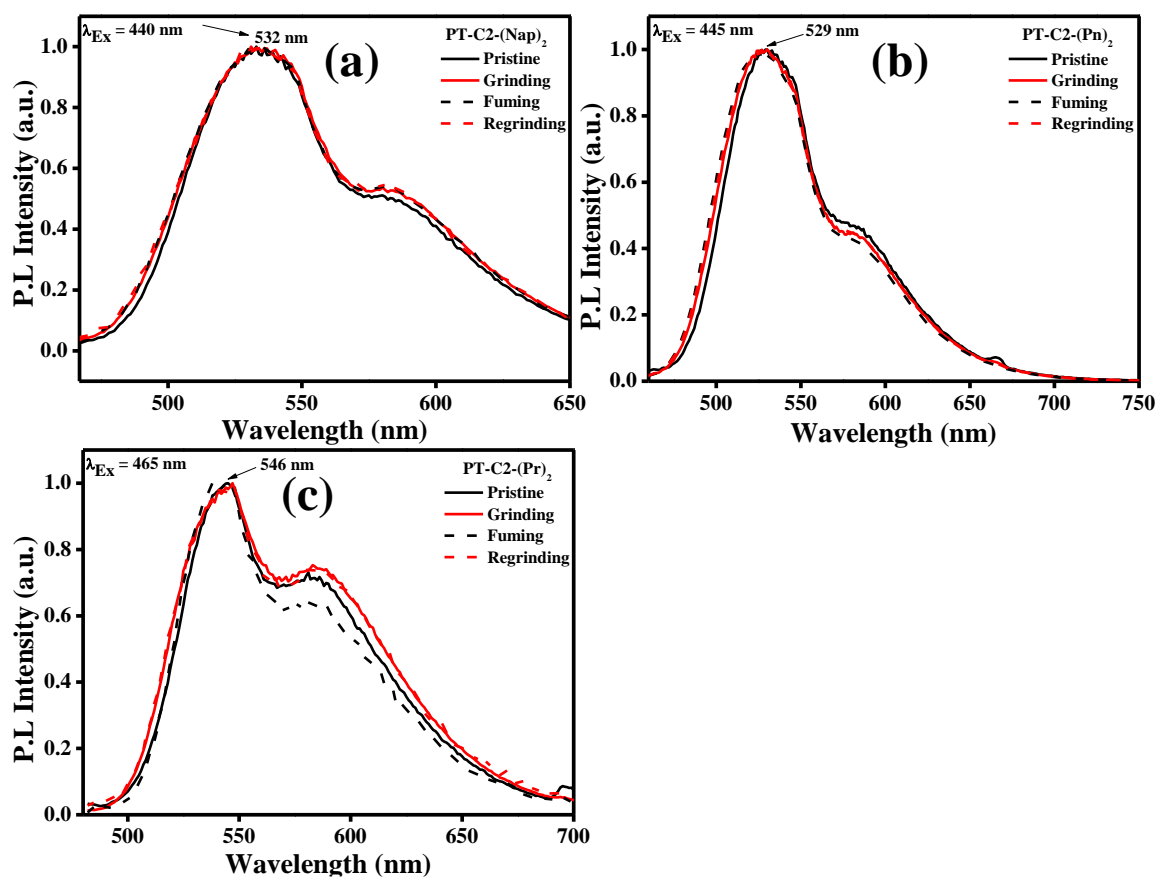

444

445

Figure S66. Fluorescence spectra of PT-derivatives upon grinding–fuming cycles.

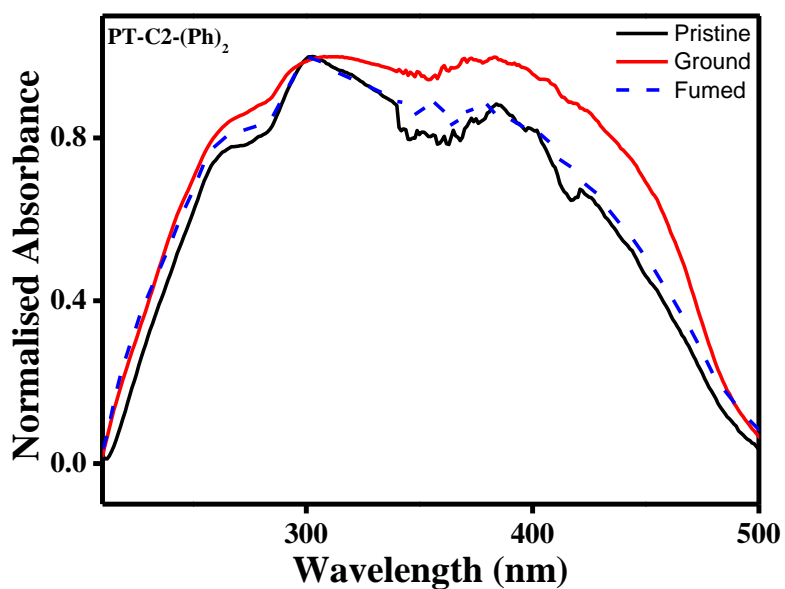

446

447

Figure S67. Absorption spectra of PT-C2-(Ph)<sub>2</sub> upon grinding–fuming cycles.

448 **Table S5.** Time-resolved fluorescence decay parameters of solid PT-C2-(Ph)<sub>2</sub> in its pristine (PT-C2-(Ph)<sub>2</sub>-P) and ground (PT-C2-(Ph)<sub>2</sub>-G) states ( $\lambda_{\text{ex}} = 405$  nm).

| Compounds, $\lambda_{\text{ex}} = 405$<br>(nm) | $\alpha_1$ | $\alpha_2$ | $\alpha_3$ | $\tau_1$<br>(ns) | $\tau_2$<br>(ns) | $\tau_3$<br>(ns) | $\tau_f$ | $\chi^2$ |
|------------------------------------------------|------------|------------|------------|------------------|------------------|------------------|----------|----------|
| PT-C2-(Ph) <sub>2</sub> -P                     | 0.36       | 0.05       | 0.59       | 1.94             | 0.18             | 4.77             | 4.19     | 1.61     |
| PT-C2-(Ph) <sub>2</sub> -G                     | 0.05       | 0.63       | 0.32       | 0.13             | 4.86             | 8.03             | 6.29     | 1.74     |

449

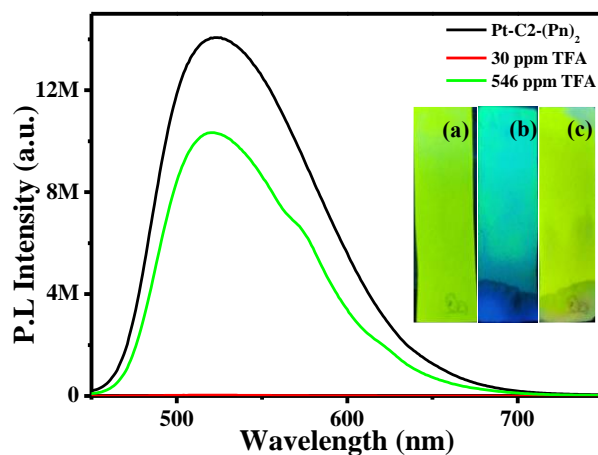

450

451 **Figure S68.** Fluorescence emission spectra of PT-C2-(Pn)<sub>2</sub> thin film, recorded under the saturated vapors of TFA and TEA. Inset showing the color change of PT-  
452 C2-(Pn)<sub>2</sub> thin film (a) before and (b) after addition of TFA followed by the addition of (c) TEA.

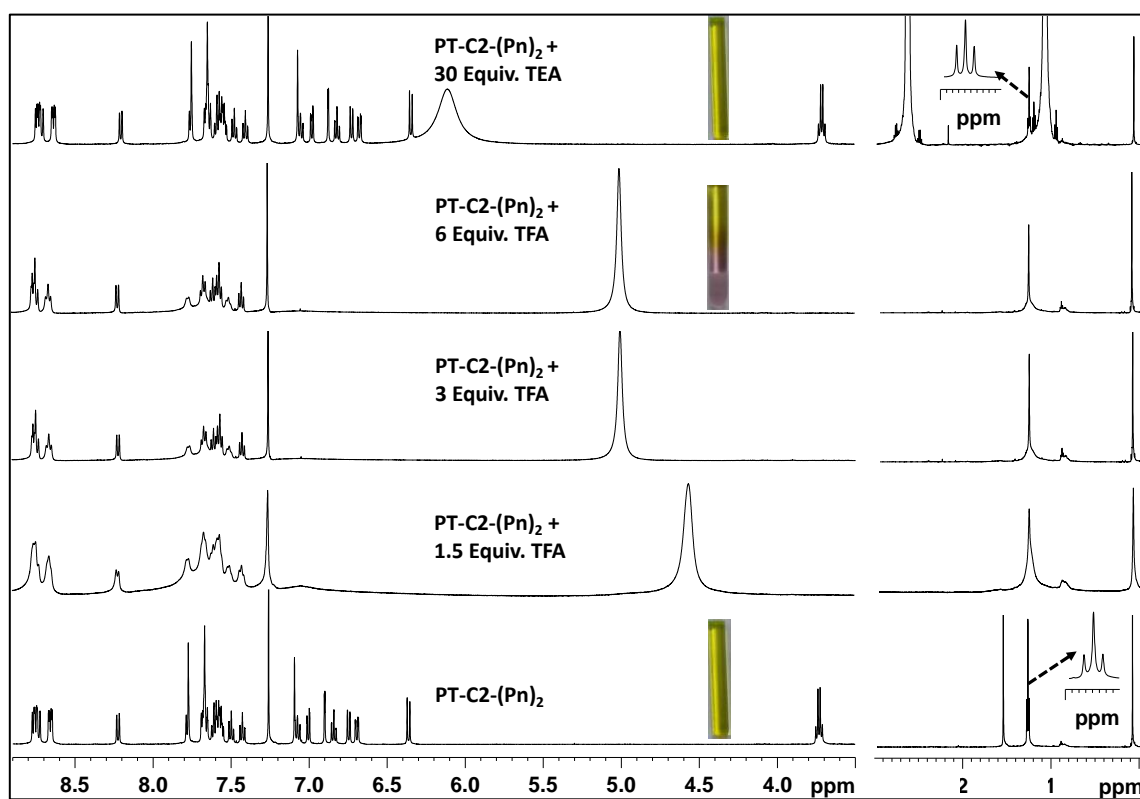

453

454 **Figure S69.** <sup>1</sup>H NMR spectra of PT-C2-(Pn)<sub>2</sub> in CDCl<sub>3</sub> before and after addition of increased amount TFA followed by excess addition of TEA (top). Insets of  
455 each spectrum represent respective photographs taken under normal light.

456

457

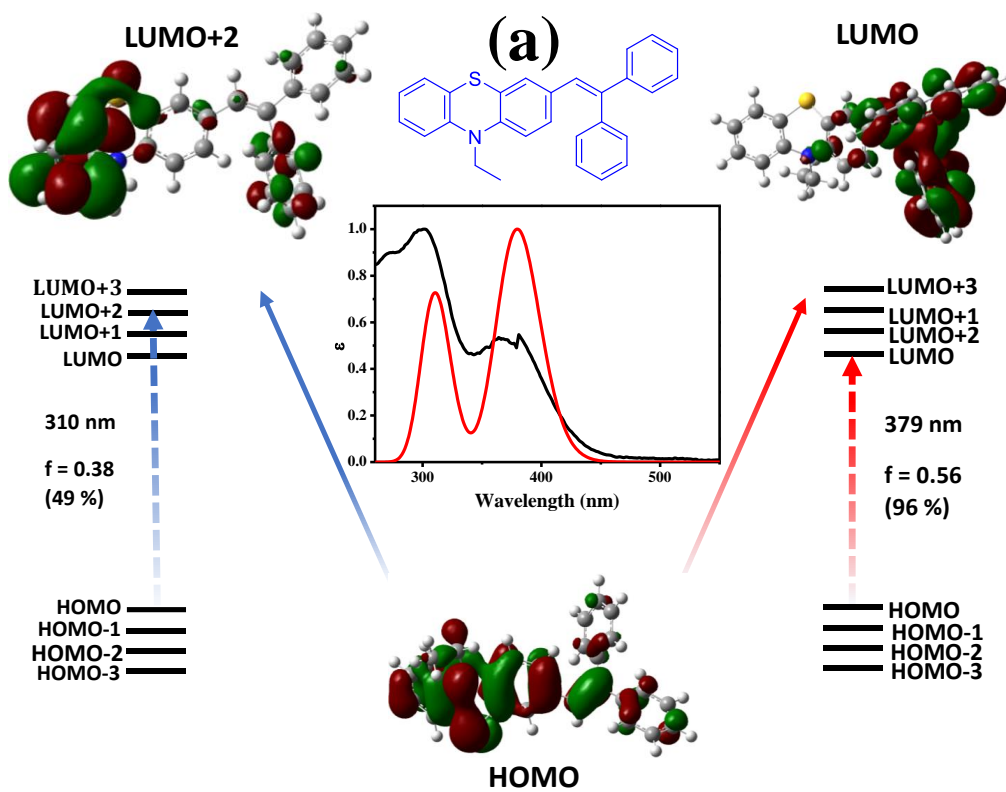

458

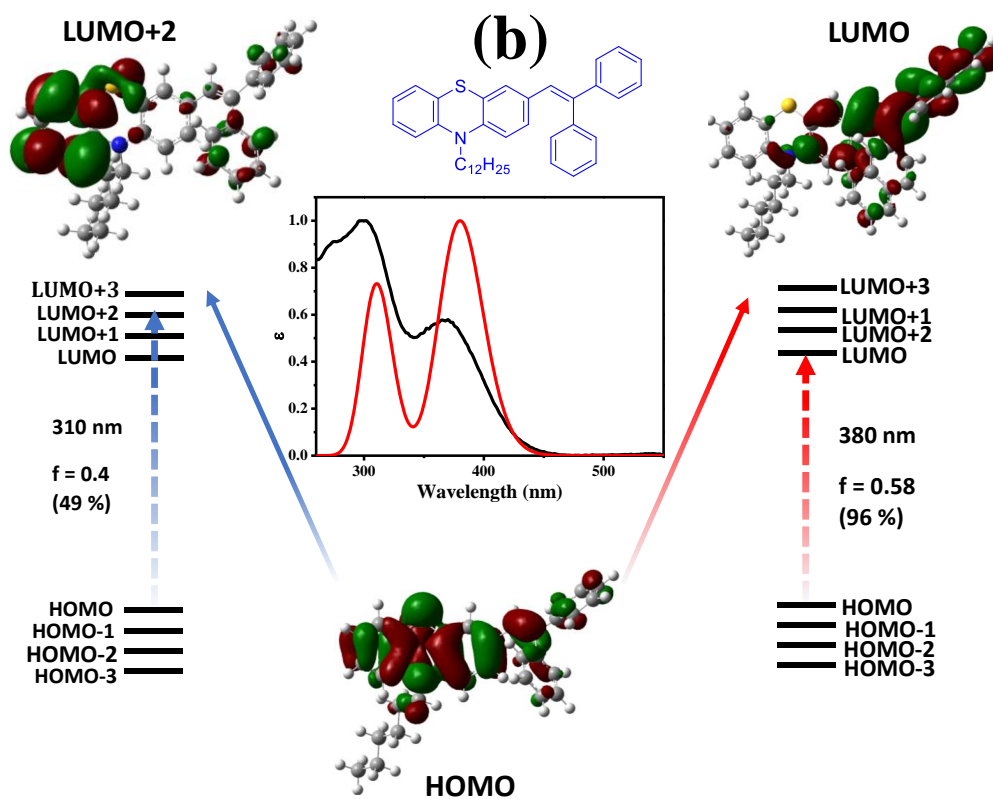

459

460

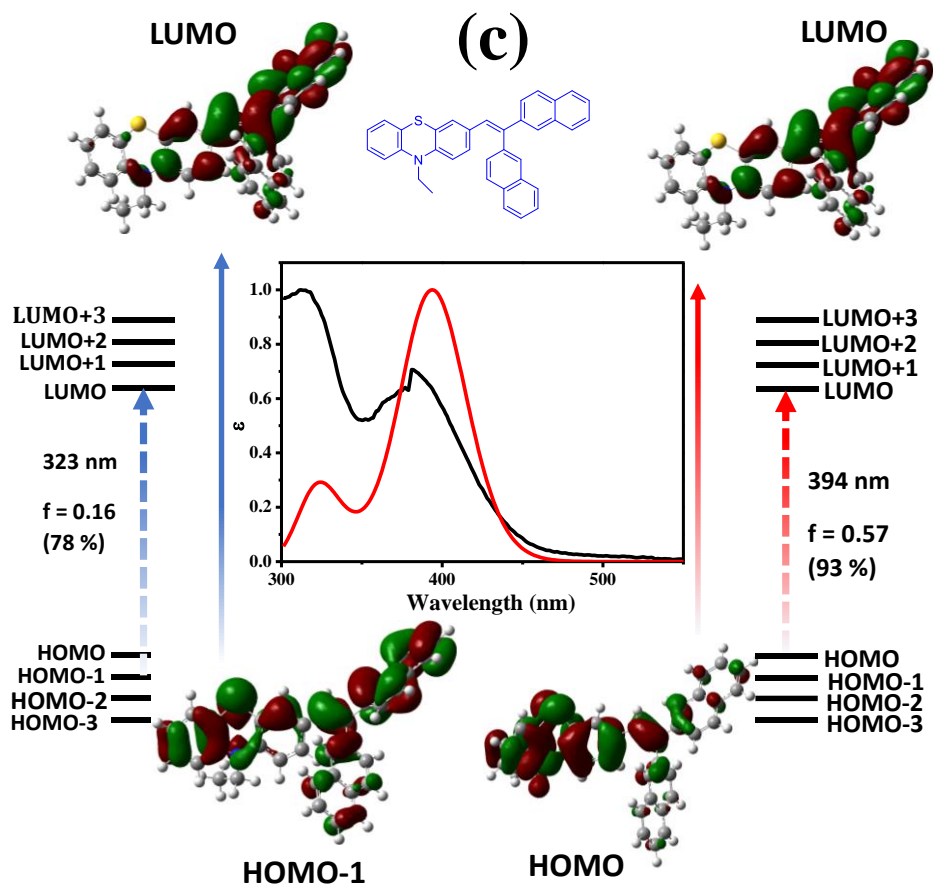

461

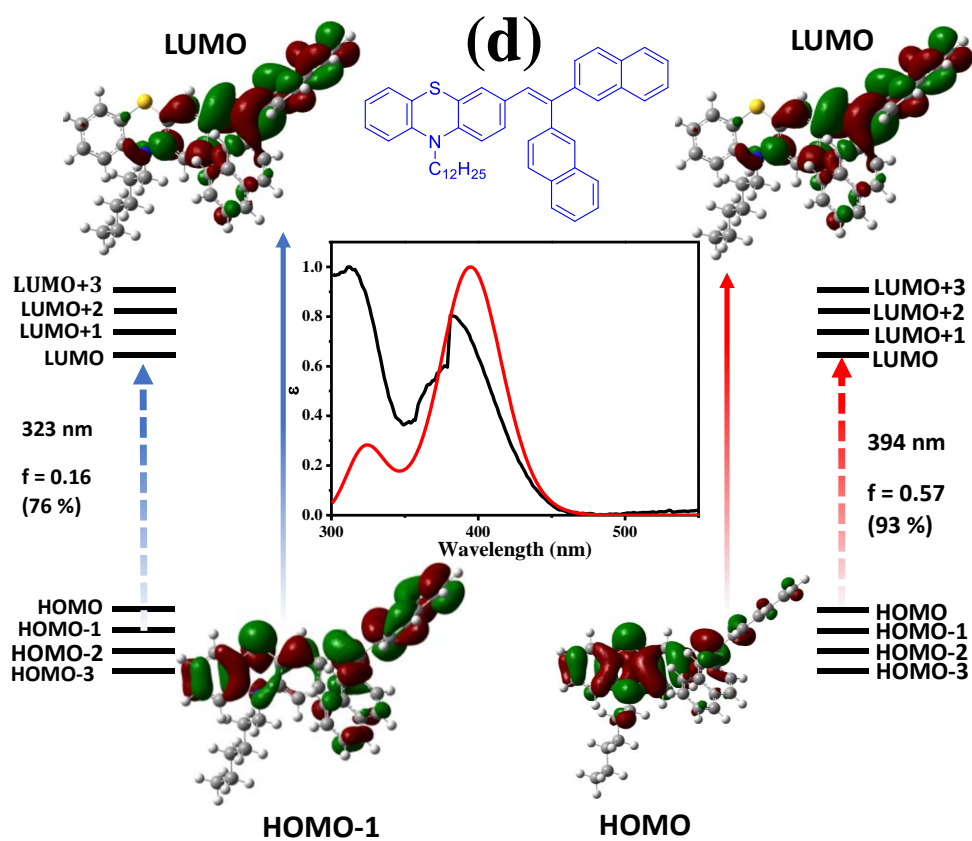

462

463

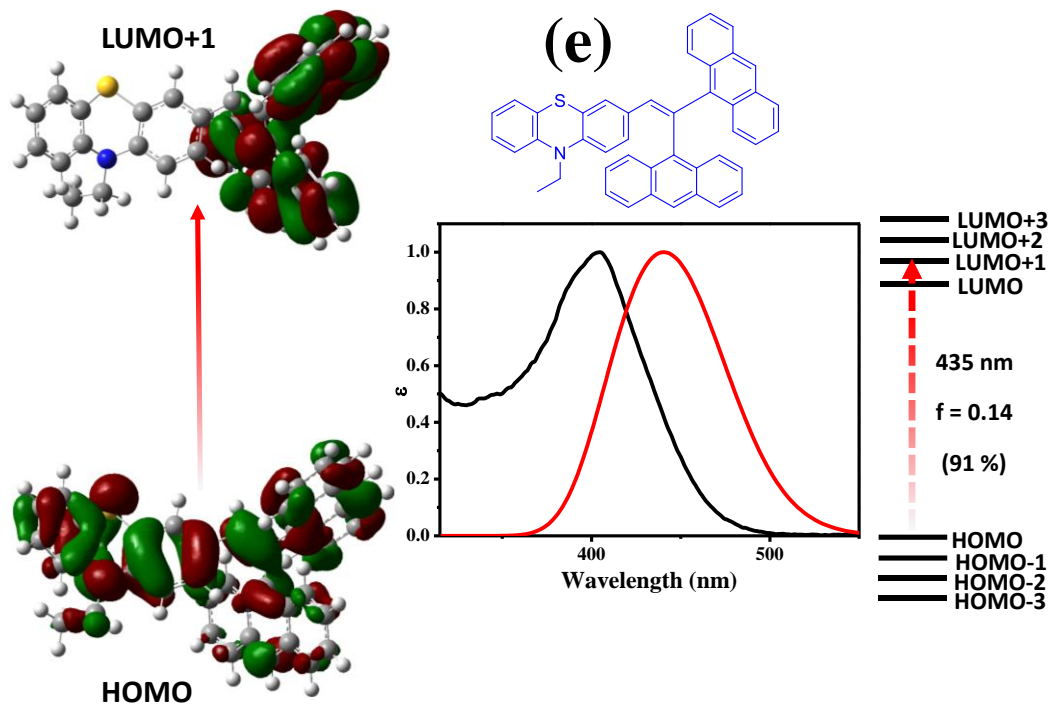

464

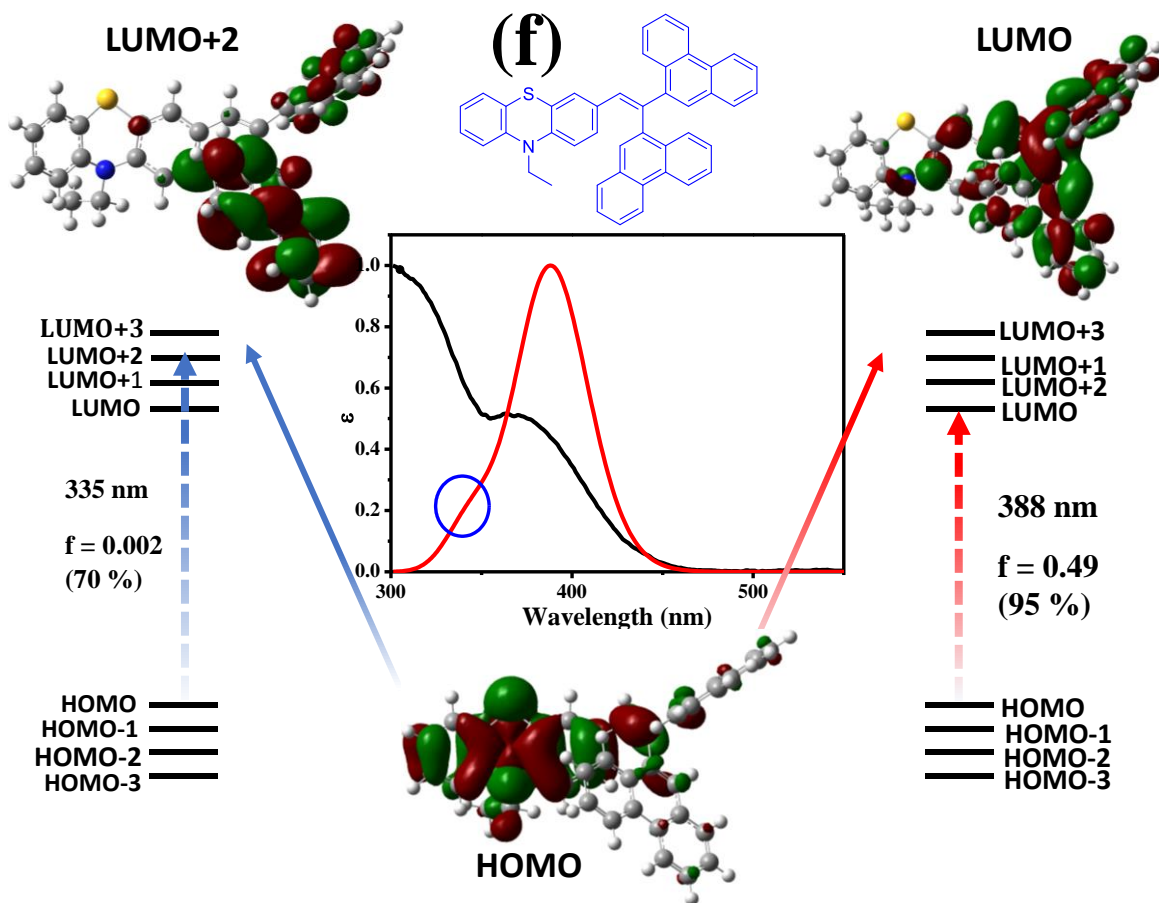

465

466

467



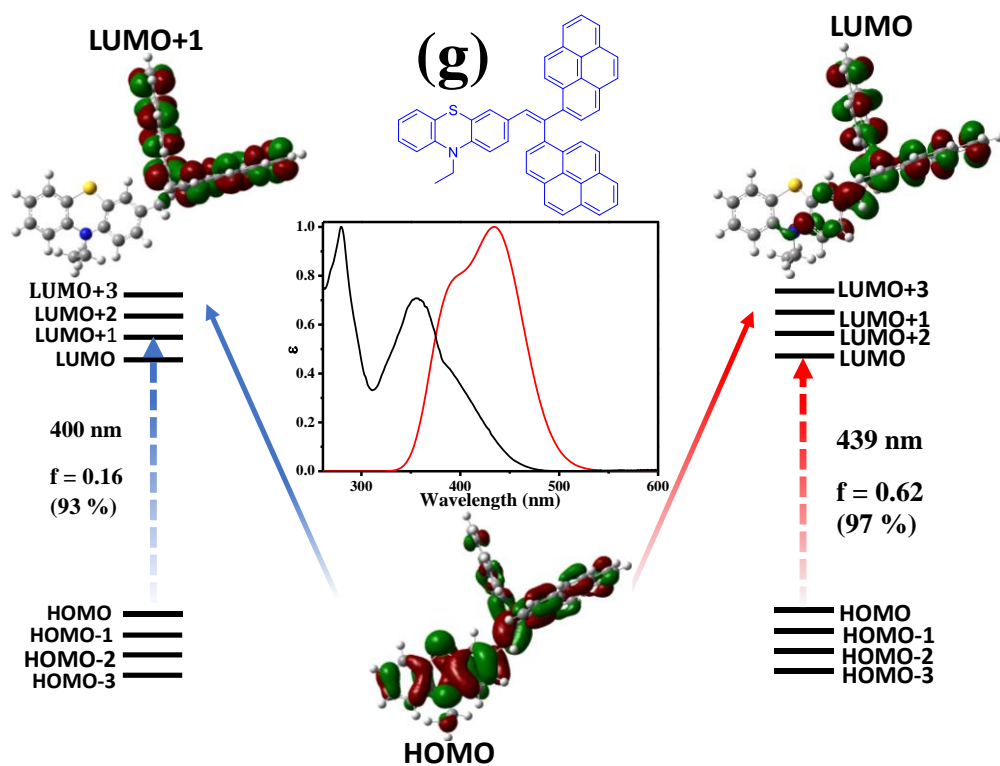

468

469

470 **Figure S70.** Theoretical determined absorption spectra and individual molecular orbital coefficients accountable for CT transition for (a) PT-C2-(Ph)<sub>2</sub>, (b) PT-  
 471 C12-(Ph)<sub>2</sub>, (c) PT-C2-(Nap)<sub>2</sub>, (d) PT-C12-(Nap)<sub>2</sub>, (e) PT-C2-(An)<sub>2</sub>, (f) PT-C2-(Pn)<sub>2</sub> and (g) PT-C2-(Pr)<sub>2</sub> obtained using td PBE1PBE/6-311+g (d, p) level of theory.

472

473 **Table S6.** Excited-state singlet and triplet energy values of the derivatives, obtained via optimizing the geometries of lowest singlet excited state (S<sub>1</sub>) and lowest  
 474 singlet excited state (T<sub>1</sub>) using TDDFT/B3LYP/ 6-311+g (d, p) and unrestricted DFT (UDFT)/B3LYP/ 6-311+g (d, p) respectively in DCM.

| Compd.                   | S (eV)    | T (eV)    | ΔE <sub>ST</sub> (eV) |
|--------------------------|-----------|-----------|-----------------------|
| PT-C2-(Ph) <sub>2</sub>  | -41741.96 | -41742.84 | 0.88                  |
| PT-C12-(Ph) <sub>2</sub> | -46022.25 | -46023.12 | 0.87                  |
| PT-C2-(Na) <sub>2</sub>  | -50105.74 | -50106.51 | 0.77                  |
| PT-C12-(Na) <sub>2</sub> | -54386.03 | -54386.80 | 0.77                  |
| PT-C2-(An) <sub>2</sub>  | -58468.60 | -58469.19 | 0.59                  |
| PT-C2-(Pn) <sub>2</sub>  | -58469.06 | -58469.83 | 0.76                  |
| PT-C2-(Pr) <sub>2</sub>  | -62618.95 | -62619.57 | 0.63                  |

475

476 **References**

- 477 1 S. Mallick, S. Maddala, K. Kollimalayan and P. Venkatakrishnan, *J. Org. Chem.*, 2019, **84**, 73–93.  
478 2 W. L. Mendelson and S. Hayden, *Synthetic Communications*, 1996, **26**, 603–610.  
479 3 W. Yu, L. Chen, J. Tao, T. Wang and J. Fu, *Chem. Commun.*, 2019, **55**, 5918–5921.  
480 4 A. M. Hamdy, N. Eleya, H. H. Mohammed, Z. Khaddour, T. Patonay, A. Villinger and P. Langer, *Tetrahedron Letters*, 2013,  
481 **54**, 3568–3571.  
482 5 I. Seguy, P. Jolinat, P. Destruel, J. Farenc, R. Mamy, H. Bock, J. Ip and T. P. Nguyen, *Journal of Applied Physics*, 2001, **89**,  
483 5442–5448.  
484
